# Supplementary material for: Organocatalytic stereoselective 1,6-addition of thiolacetic acids to alkynyl indole imine methides: access to axially chiral sulfur-containing tetrasubstituted allenes
Source: Royal Society of Chemistry journal article supplement (doi:10.1039/d1qo00394a), 2021-01-01
Supplement: d1qo00394a1.pdf [file d1qo00394a1.pdf]

# Supporting Information

Ziyang Wang,<sup>†</sup> Xiao Lin,<sup>†</sup> Xuling Chen,<sup>‡</sup> Pengfei Li,<sup>‡\*</sup> and Wenjun Li<sup>†\*</sup>

<sup>†</sup> Department of Medicinal Chemistry, School of Pharmacy, Qingdao University, Qingdao, 266021, China

<sup>‡</sup> Shenzhen Grubbs Institute and Department of Chemistry, Guangdong Provincial Key Laboratory of Catalysis, Southern University of Science and Technology (SUSTech), Shenzhen, Guangdong, 518055, China

|                                                     |    |
|-----------------------------------------------------|----|
| A: General Information and Starting Materials ..... | 2  |
| B: General Procedure .....                          | 2  |
| C: Characterization Data.....                       | 3  |
| D: Gram Scale Reaction.....                         | 12 |
| E: Control Experiments.....                         | 12 |
| F: Limitation of The Reaction.....                  | 12 |
| G: ESI-MS Studies.....                              | 13 |
| H: Synthetic Transformations .....                  | 14 |
| I: HPLC Analysis .....                              | 18 |
| J: NMR Analysis.....                                | 41 |
| K: X-ray Analysis .....                             | 76 |
| L: Reference.....                                   | 78 |

## A: General Information and Starting Materials

**General Information.** Proton nuclear magnetic resonance ( $^1\text{H}$  NMR) spectra, carbon nuclear magnetic resonance ( $^{13}\text{C}$  NMR) spectra and fluorine nuclear magnetic resonance ( $^{19}\text{F}$  NMR) spectra were recorded on a Bruker ACF300 spectrometer (500 MHz, 126 MHz and 471 MHz). Chemical shifts for protons are reported in parts per million downfield from tetramethylsilane and are referenced to residual protium in the NMR solvent ( $\text{CDCl}_3$ :  $\delta$  7.26;  $\text{DMSO-}d_6$ :  $\delta$  2.50). Chemical shifts for carbon are reported in parts per million downfield from tetramethylsilane and are referenced to the carbon resonances of the solvent ( $\text{CDCl}_3$ :  $\delta$  77.0;  $\text{DMSO-}d_6$ :  $\delta$  39.50). Data are represented as follows: chemical shift, integration, multiplicity (br = broad, s = singlet, d = doublet, t = triplet, q = quartet, m = multiplet), coupling constants in Hertz (Hz). All high resolution mass spectra were obtained on a Finnigan/MAT 95XL-T mass spectrometer. For thin layer chromatography (TLC), Merck pre-coated TLC plates (Merck 60 F254) were used, and compounds were visualized with a UV light at 254 nm. Flash chromatography separations were performed on Merck 60 (0.040-0.063 mm) mesh silica gel.

**Starting Materials.** All solvents, inorganic reagents were from commercial sources and used without purification unless otherwise noted.  $\alpha$ -indolyl propargylic alcohols were prepared following the literature procedures.<sup>1-2</sup>

## B: General Procedure

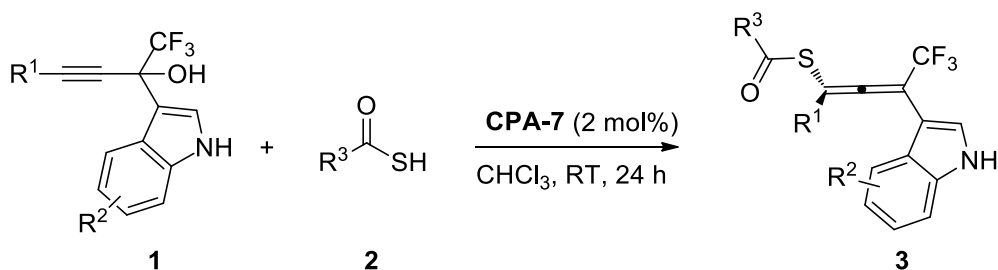

To a solution of  $\text{CHCl}_3$  (0.3 mL) were added  $\alpha$ -indolyl propargylic alcohols **1** (0.05 mmol), thiolacetic acid **2** (0.06 mmol) and CPA-7 (0.001 mmol). The reaction mixture was stirred at room temperature for 24 h and then the solvent was removed under vacuum. The residue was purified by silica gel chromatography to yield the desired product **3**.

## C: Characterization Data

### (*S,S*)-(4,4,4-trifluoro-3-(1*H*-indol-3-yl)-1-phenylbuta-1,2-dien-1-yl) ethanethioate (3aa)

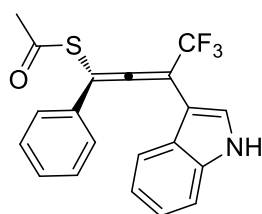

Eluent for flash column chromatography: petroleum ether/ethyl acetate = 50:1. Brown oil, 17.7 mg, 95% yield.  $^1\text{H}$  NMR (DMSO- $d_6$ , 500 MHz):  $\delta$  (ppm) 11.74 (s, 1H), 7.61-7.59 (m, 2H), 7.52-7.50 (m, 2H), 7.44-7.38 (m, 3H), 7.35-7.31 (m, 1H), 7.15-7.11 (m, 1H), 6.98-6.95 (m, 1H), 2.44 (s, 3H).  $^{13}\text{C}$  NMR (DMSO- $d_6$ , 126 MHz):  $\delta$  (ppm) 207.6, 192.0, 136.9, 133.0, 129.6, 127.1, 126.2, 126.1, 125.2, 122.0 (q,  $J = 270.0$  Hz), 122.2, 112.8, 105.5, 100.5, 99.5 (q,  $J = 43.8$  Hz), 30.8.  $^{19}\text{F}$  NMR (DMSO- $d_6$ , 471 MHz):  $\delta$  (ppm) -60.16. HRMS (ESI): exact mass calculated for  $[\text{M}+\text{H}]^+$  ( $\text{C}_{20}\text{H}_{15}\text{F}_3\text{NOS}$ ) requires  $m/z$  374.0821, found  $m/z$  374.08020. The enantiomeric excess was determined to be 92% by HPLC. [OD column, 254 nm, *n*-hexane:IPA = 90:10, 1.0 mL/min]: 8.2 min (minor), 10.3 min (major).  $[\alpha]_D^{22} = +28.4$  ( $c = 1.00$ ,  $\text{CH}_2\text{Cl}_2$ ).

### (*S,S*)-(1-(4-chlorophenyl)-4,4,4-trifluoro-3-(1*H*-indol-3-yl)buta-1,2-dien-1-yl) ethanethioate (3ba)

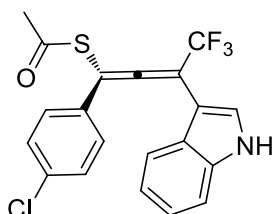

Eluent for flash column chromatography: petroleum ether/ethyl acetate = 50:1. Brown oil, 17.3 mg, 85% yield.  $^1\text{H}$  NMR (DMSO- $d_6$ , 500 MHz):  $\delta$  (ppm) 11.83 (s, 1H), 7.67 (s, 1H), 7.64-7.62 (d,  $J = 10.0$  Hz, 1H), 7.59-7.57 (m, 2H), 7.54-7.52 (m, 2H), 7.51-7.49 (m, 1H), 7.22-7.18 (m, 1H), 7.06-7.02 (m, 1H), 2.51 (s, 3H).  $^{13}\text{C}$  NMR (DMSO- $d_6$ , 126 MHz):  $\delta$  207.8, 191.9, 136.9, 134.3, 132.1, 129.7, 128.8, 126.4, 126.3, 124.8, 122.1 (q,  $J = 263.8$  Hz), 122.0, 112.8, 104.7, 100.4, 100.2, 99.9 (q,  $J = 43.8$  Hz), 30.8.  $^{19}\text{F}$  NMR (DMSO- $d_6$ , 471 MHz):  $\delta$  (ppm) -60.12. HRMS (ESI): exact mass calculated for  $[\text{M}+\text{H}]^+$  ( $\text{C}_{20}\text{H}_{14}\text{ClF}_3\text{NOS}$ ) requires  $m/z$  408.0431, found  $m/z$  408.0431. The enantiomeric excess was determined to be 90% by HPLC. [IA column, 254 nm, *n*-hexane:EtOH = 95:5, 1.0 mL/min]: 9.2 min (minor), 8.4 min (major).  $[\alpha]_D^{22} = +32.2$  ( $c = 1.00$ ,  $\text{CH}_2\text{Cl}_2$ ).

### (*S,S*)-(1-(4-bromophenyl)-4,4,4-trifluoro-3-(1*H*-indol-3-yl)buta-1,2-dien-1-yl) ethanethioate (3ca)

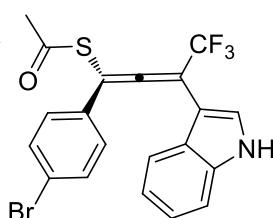

Eluent for flash column chromatography: petroleum ether/ethyl acetate = 50:1. Brown oil, 18.7 mg, 83% yield.  $^1\text{H}$  NMR (DMSO- $d_6$ , 500 MHz):  $\delta$  (ppm) 11.83 (s, 1H), 7.68-7.62 (m, 4H), 7.52-7.49 (m, 3H), 7.22-7.18 (m, 1H), 7.06-7.02 (m, 1H), 2.51 (s, 3H).  $^{13}\text{C}$  NMR (DMSO- $d_6$ , 126 MHz): 207.8, 191.9, 136.9, 132.6, 132.5, 129.1, 126.4, 126.3, 124.8, 123.0, 122.1 (q,  $J = 263.8$  Hz), 121.0, 112.8, 104.9, 100.16, 99.9 (q,  $J = 43.8$  Hz), 30.8.  $^{19}\text{F}$

NMR (DMSO-*d*<sub>6</sub>, 471 MHz):  $\delta$  (ppm) -60.12. HRMS (ESI): exact mass calculated for  $[M+H]^+$  (C<sub>20</sub>H<sub>14</sub>BrF<sub>3</sub>NOS) requires  $m/z$  451.9926, found  $m/z$  451.9922. The enantiomeric excess was determined to be 92% by HPLC. [IA column, 254 nm, *n*-hexane:EtOH = 95:5, 1.0 mL/min]: 9.5 min (minor), 8.6 min (major).  $[\alpha]_D^{22} = +32.5$  ( $c = 1.00$ , CH<sub>2</sub>Cl<sub>2</sub>).

**(*S,S*)-(4,4,4-trifluoro-3-(1*H*-indol-3-yl)-1-(*p*-tolyl)buta-1,2-dien-1-yl)ethanethioate (3da)**

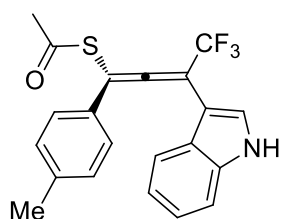

Eluent for flash column chromatography: petroleum ether/ethyl acetate = 50:1. Brown oil, 17.6 mg, 91% yield. <sup>1</sup>H NMR (DMSO-*d*<sub>6</sub>, 500 MHz):  $\delta$  (ppm) 11.78 (s, 1H), 7.68-7.65 (m, 2H), 7.50-7.45 (m, 3H), 7.27-7.25 (d,  $J = 10.0$  Hz, 2H), 7.21-7.17 (m, 1H), 7.04-7.01 (m, 1H), 2.49 (s, 3H), 2.31 (s, 3H). <sup>13</sup>C NMR (DMSO-*d*<sub>6</sub>, 126 MHz):  $\delta$  (ppm) 207.2, 192.0, 139.4, 136.9, 130.2, 130.1, 127.0, 126.0, 126.0, 124.9, 122.2, 122.0 (q,  $J = 271.3$  Hz), 119.3, 112.7, 105.4, 100.7, 99.4 (q,  $J = 43.8$  Hz), 30.8, 21.2. <sup>19</sup>F NMR (DMSO-*d*<sub>6</sub>, 471 MHz):  $\delta$  (ppm) -60.20. HRMS (ESI): exact mass calculated for  $[M+H]^+$  (C<sub>21</sub>H<sub>17</sub>F<sub>3</sub>NOS) requires  $m/z$  388.0977, found  $m/z$  388.0975. The enantiomeric excess was determined to be 91% by HPLC. [OD column, 254 nm, *n*-hexane:IPA = 95:5, 1.0 mL/min]: 7.3 min (minor), 8.1 min (major).  $[\alpha]_D^{22} = +119.1$  ( $c = 1.00$ , CH<sub>2</sub>Cl<sub>2</sub>).

**(*S,S*)-(4,4,4-trifluoro-3-(1*H*-indol-3-yl)-1-(4-methoxyphenyl)buta-1,2-dien-1-yl)ethanethioate (3ea)**

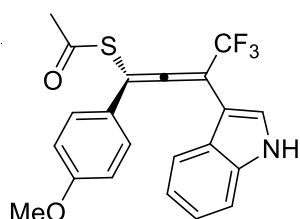

Eluent for flash column chromatography: petroleum ether/ethyl acetate = 20:1. Brown oil, 19.8 mg, 98% yield. <sup>1</sup>H NMR (DMSO-*d*<sub>6</sub>, 500 MHz):  $\delta$  (ppm) 11.77 (s, 1H), 7.68-7.64 (m, 2H), 7.50-7.48 (d,  $J = 10.0$  Hz, 3H), 7.21-7.17 (m, 1H), 7.05-7.01 (m, 3H), 3.78 (s, 3H), 2.49 (s, 3H). <sup>13</sup>C NMR (DMSO-*d*<sub>6</sub>, 126 MHz):  $\delta$  (ppm) 206.8, 192.0, 160.5, 136.9, 128.6, 126.0, 125.9, 125.2, 122.2, 122.1 (q,  $J = 270.0$  Hz), 115.1, 112.7, 105.1, 100.9, 99.2 (q,  $J = 43.8$  Hz), 55.8, 30.8. <sup>19</sup>F NMR (DMSO-*d*<sub>6</sub>, 471 MHz):  $\delta$  (ppm) -60.23. HRMS (ESI): exact mass calculated for  $[M+H]^+$  (C<sub>21</sub>H<sub>17</sub>F<sub>3</sub>NO<sub>2</sub>S) requires  $m/z$  404.0927, found  $m/z$  404.0925. The enantiomeric excess was determined to be 90% by HPLC. [OD column, 254 nm, *n*-hexane:IPA = 90:10, 1.0 mL/min]: 10.6 min (minor), 11.6 min (major).  $[\alpha]_D^{22} = +139.9$  ( $c = 1.00$ , CH<sub>2</sub>Cl<sub>2</sub>).

**(*S,S*)-(4,4,4-trifluoro-1-(3-fluorophenyl)-3-(1*H*-indol-3-yl)buta-1,2-dien-1-yl)ethanethioate (3fa)**

Eluent for flash column chromatography: petroleum ether/ethyl acetate = 50:1. Brown oil, 18.5 mg, 95% yield. <sup>1</sup>H NMR (DMSO-*d*<sub>6</sub>, 500 MHz):  $\delta$  (ppm) 11.85 (s, 1H), 7.69 (s, 1H), 7.65-7.63 (d,  $J = 10.0$  Hz, 1H), 7.55-7.50 (m, 2H), 7.43-7.41 (m, 1H),

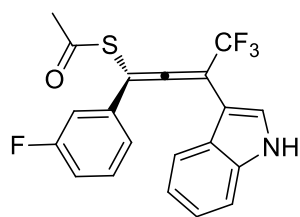

7.36-7.32 (m, 1H), 7.29-7.23 (m, 1H), 7.23-7.19 (m, 1H), 7.07-7.03 (m, 1H) 2.52 (s, 3H).  $^{13}\text{C}$  NMR (DMSO- $d_6$ , 126 MHz):  $\delta$  (ppm) 208.1, 191.9, 163.0 (d,  $J = 307.4$  Hz), 136.9, 135.9 (d,  $J = 8.8$  Hz), 131.7 (d,  $J = 8.8$  Hz), 126.5, 126.4, 124.8, 123.4, 123.3, 122.1 (q,  $J = 263.8$  Hz), 122.0, 116.5 (d,  $J = 26.3$  Hz), 113.7 (d,  $J = 28.8$  Hz), 112.8, 104.7, 104.6, 100.1, 100.0 (q,  $J = 43.8$  Hz), 30.8.  $^{19}\text{F}$  NMR (DMSO- $d_6$ , 471 MHz):  $\delta$  (ppm) -60.11, -112.15. HRMS (ESI): exact mass calculated for  $[\text{M}+\text{H}]^+$  ( $\text{C}_{20}\text{H}_{14}\text{F}_4\text{NOS}$ ) requires  $m/z$  392.0727, found  $m/z$  392.0725. The enantiomeric excess was determined to be 88% by HPLC. [OD column, 254 nm,  $n$ -hexane:IPA = 90:10, 1.0 mL/min]: 7.7 min (minor), 8.7 min (major).  $[\alpha]_D^{22} = +61.5$  ( $c = 1.00$ ,  $\text{CH}_2\text{Cl}_2$ ).

**(S)-S-(1-(3-chlorophenyl)-4,4,4-trifluoro-3-(1H-indol-3-yl)buta-1,2-dien-1-yl)ethanethioate (3ga)**

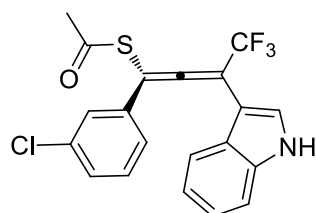

Eluent for flash column chromatography: petroleum ether/ethyl acetate = 50:1. Brown oil, 17.3 mg, 85% yield.  $^1\text{H}$  NMR (DMSO- $d_6$ , 500 MHz):  $\delta$  (ppm) 11.86 (s, 1H), 7.69 (s, 1H), 7.65-7.63 (d,  $J = 10.0$  Hz, 1H), 7.54-7.49 (m, 5H), 7.23-7.19 (m, 1H), 7.08-7.04 (m, 1H), 2.53 (s, 3H).  $^{13}\text{C}$  NMR (DMSO- $d_6$ , 126 MHz):  $\delta$  (ppm) 208.1, 191.9, 172.5, 136.9, 135.6, 134.4, 131.6, 129.5, 126.5, 126.4, 125.9, 124.8, 122.1 (q,  $J = 263.8$  Hz), 122.0, 112.9, 104.5, 100.1 (q,  $J = 43.8$  Hz), 100.0, 30.8.  $^{19}\text{F}$  NMR (DMSO- $d_6$ , 471 MHz):  $\delta$  (ppm) -60.08. HRMS (ESI): exact mass calculated for  $[\text{M}+\text{H}]^+$  ( $\text{C}_{20}\text{H}_{14}\text{ClF}_3\text{NOS}$ ) requires  $m/z$  408.0431, found  $m/z$  408.0429. The enantiomeric excess was determined to be 86% by HPLC. [OD column, 254 nm,  $n$ -hexane:IPA = 90:10, 1.0 mL/min]: 7.8 min (minor), 8.4 min (major).  $[\alpha]_D^{22} = +145.5$  ( $c = 1.00$ ,  $\text{CH}_2\text{Cl}_2$ ).

**(S)-S-(4,4,4-trifluoro-3-(1H-indol-3-yl)-1-(*m*-tolyl)buta-1,2-dien-1-yl)ethanethioate (3ha)**

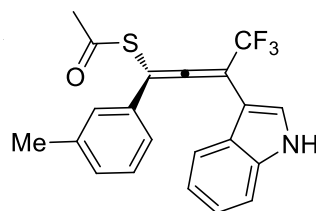

Eluent for flash column chromatography: petroleum ether/ethyl acetate = 50:1. Brown oil, 18.8 mg, 97% yield.  $^1\text{H}$  NMR (DMSO- $d_6$ , 500 MHz):  $\delta$  (ppm) 11.80 (s, 1H), 7.68-7.66 (m, 2H), 7.51-7.49 (d,  $J = 10.0$  Hz, 1H), 7.38-7.32 (m, 3H), 7.22-7.17 (m, 2H), 7.06-7.02 (m, 1H), 2.50 (s, 3H), 2.32 (s, 3H).  $^{13}\text{C}$  NMR (DMSO- $d_6$ , 126 MHz):  $\delta$  (ppm) 207.6, 192.0, 139.0, 137.0, 133.1, 130.4, 129.6, 127.5, 126.2, 124.5, 124.4, 122.7, 122.0 (q,  $J = 263.8$  Hz), 112.8, 105.5, 100.6, 99.4 (q,  $J = 28.8$  Hz), 30.9, 21.5.  $^{19}\text{F}$  NMR (DMSO- $d_6$ , 471 MHz):  $\delta$  (ppm) -60.05. HRMS (ESI): exact mass calculated for  $[\text{M}+\text{H}]^+$  ( $\text{C}_{21}\text{H}_{17}\text{F}_3\text{NOS}$ ) requires  $m/z$  388.0977, found  $m/z$  388.0975. The enantiomeric excess was determined to be 91% by HPLC. [OD column, 254 nm,  $n$ -hexane:IPA = 95:5, 1.0 mL/min]: 11.3 min (minor), 12.9 min (major).  $[\alpha]_D^{22} = +109.7$  ( $c = 1.00$ ,  $\text{CH}_2\text{Cl}_2$ ).

**(S)-S-(4,4,4-trifluoro-3-(1H-indol-3-yl)-1-(3-methoxyphenyl)buta-1,2-dien-1-yl)ethanethioate (3ia)**

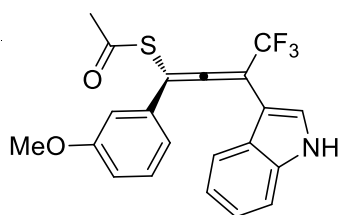

Eluent for flash column chromatography: petroleum ether/ethyl acetate = 20:1. Brown oil, 18.1 mg, 90% yield.  $^1\text{H}$  NMR (DMSO- $d_6$ , 500 MHz):  $\delta$  (ppm) 11.80 (s, 1H), 7.67-7.65 (m, 2H), 7.51-7.49 (d,  $J = 10.0$  Hz, 1H), 7.41-7.37 (m, 1H), 7.21-7.14 (m, 2H), 7.06-6.99 (m, 3H), 3.75 (s, 3H), 2.50 (s, 3H).  $^{13}\text{C}$  NMR (DMSO- $d_6$ , 126 MHz):  $\delta$  (ppm) 207.7, 191.9, 160.2, 136.9, 134.6, 130.8, 126.2, 126.1, 124.9, 122.1, 122.0 (q,  $J = 268.8$  Hz), 119.5, 114.6, 113.0, 112.8, 105.2, 100.4, 99.5 (q,  $J = 43.8$  Hz), 55.7, 30.8.  $^{19}\text{F}$  NMR (DMSO- $d_6$ , 471 MHz):  $\delta$  (ppm) -60.05. HRMS (ESI): exact mass calculated for  $[\text{M}+\text{H}]^+$  ( $\text{C}_{21}\text{H}_{17}\text{F}_3\text{NO}_2\text{S}$ ) requires  $m/z$  404.0927, found  $m/z$  404.0927. The enantiomeric excess was determined to be 89% by HPLC. [OD column, 254 nm, *n*-hexane:IPA = 90:10, 1.0 mL/min]: 9.3 min (minor), 10.5 min (major).  $[\alpha]_{\text{D}}^{22} = +174.8$  ( $c = 1.00$ ,  $\text{CH}_2\text{Cl}_2$ ).

**(S)-S-(4,4,4-trifluoro-1-(2-fluorophenyl)-3-(1H-indol-3-yl)buta-1,2-dien-1-yl)ethanethioate (3ja)**

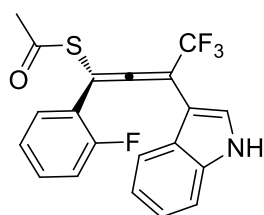

Eluent for flash column chromatography: petroleum ether/ethyl acetate = 50:1. Brown oil, 15.8 mg, 81% yield.  $^1\text{H}$  NMR (DMSO- $d_6$ , 500 MHz):  $\delta$  (ppm) 11.77 (s, 1H), 7.69-7.61 (m, 3H), 7.49-7.44 (m, 2H), 7.34-7.26 (m, 2H), 7.21-7.17 (m, 1H), 7.06-7.03 (m, 1H), 2.49 (s, 3H).  $^{13}\text{C}$  NMR (DMSO- $d_6$ , 126 MHz):  $\delta$  (ppm) 210.0, 192.0, 160.0 (d,  $J = 315.0$  Hz), 136.9, 131.7 (d,  $J = 11.3$  Hz), 130.0, 126.1, 126.0, 125.5, 125.4, 124.9, 122.2, 121.9 (q,  $J = 278.8$  Hz), 121.3 (d,  $J = 12.5$  Hz), 116.8 (d,  $J = 26.3$  Hz), 112.7, 100.4, 99.0, 97.5 (q,  $J = 43.8$  Hz), 30.7.  $^{19}\text{F}$  NMR (DMSO- $d_6$ , 471 MHz):  $\delta$  (ppm) -60.33, -111.97. HRMS (ESI): exact mass calculated for  $[\text{M}+\text{H}]^+$  ( $\text{C}_{20}\text{H}_{14}\text{F}_4\text{NOS}$ ) requires  $m/z$  392.0727, found  $m/z$  392.0724. The enantiomeric excess was determined to be 90% by HPLC. [OD column, 254 nm, *n*-hexane:IPA = 90:10, 1.0 mL/min]: 8.8 min (minor), 10.7 min (major).  $[\alpha]_{\text{D}}^{22} = +36.4$  ( $c = 1.00$ ,  $\text{CH}_2\text{Cl}_2$ ).

**(S)-S-(1-(2-chlorophenyl)-4,4,4-trifluoro-3-(1H-indol-3-yl)buta-1,2-dien-1-yl)ethanethioate (3ka)**

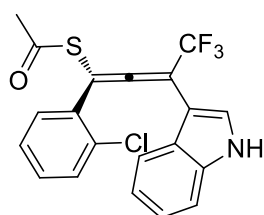

Eluent for flash column chromatography: petroleum ether/ethyl acetate = 50:1. Brown oil, 17.3 mg, 85% yield.  $^1\text{H}$  NMR (DMSO- $d_6$ , 500 MHz):  $\delta$  (ppm) 11.79 (s, 1H), 7.81-7.79 (d,  $J = 10.0$  Hz, 1H), 7.68-7.65 (m, 1H), 7.61 (s, 1H), 7.55-7.53 (m, 1H), 7.50-7.48 (m, 1H), 7.45-7.41 (m, 2H), 7.23-7.19 (m, 1H), 7.12-7.08 (m, 1H), 2.45 (s, 3H).  $^{13}\text{C}$  NMR (DMSO- $d_6$ , 126 MHz):  $\delta$  (ppm) 208.3, 191.8, 136.9, 132.7, 132.3, 131.1, 131.0, 130.8, 128.2, 126.3, 126.2, 125.0, 122.2, 121.9 (q,  $J = 265.0$  Hz), 112.8, 102.3, 100.3, 98.2 (q,  $J = 43.8$

Hz), 30.7.  $^{19}\text{F}$  NMR (DMSO- $d_6$ , 471 MHz):  $\delta$  (ppm) -59.91. HRMS (ESI): exact mass calculated for  $[\text{M}+\text{H}]^+$  ( $\text{C}_{20}\text{H}_{14}\text{ClF}_3\text{NOS}$ ) requires  $m/z$  408.0431, found  $m/z$  408.0430. The enantiomeric excess was determined to be 90% by HPLC. [OD column, 254 nm, *n*-hexane:IPA = 90:10, 1.0 mL/min]: 8.5 min (minor), 9.4 min (major).  $[\alpha]_{\text{D}}^{22} = -4.0$  ( $c = 1.00$ ,  $\text{CH}_2\text{Cl}_2$ ).

**(*S*)-*S*-(4,4,4-trifluoro-3-(1*H*-indol-3-yl)-1-(thiophen-3-yl)buta-1,2-dien-1-yl) ethanethioate (3la)**

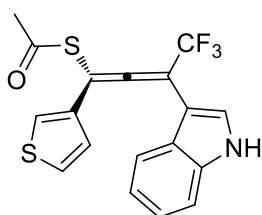

Eluent for flash column chromatography: petroleum ether/ethyl acetate = 50:1. Brown oil, 18.3 mg, 97% yield.  $^1\text{H}$  NMR (DMSO- $d_6$ , 500 MHz):  $\delta$  (ppm) 11.77 (s, 1H), 7.75-7.74 (m, 1H), 7.68-7.64 (m, 3H), 7.50-7.48 (d,  $J = 10.0$  Hz, 1H), 7.21-7.17 (m, 1H), 7.12-7.11 (m, 1H), 7.06-7.02 (m, 1H), 2.50 (s, 3H).  $^{13}\text{C}$  NMR (DMSO- $d_6$ , 126 MHz):  $\delta$  (ppm) 207.3, 191.8, 136.8, 134.7, 128.8, 126.3, 126.1, 126.0, 125.7, 124.8, 122.0, 121.9 (q,  $J = 272.5$  Hz), 112.7, 100.8, 100.7, 99.1 (q,  $J = 43.8$  Hz), 30.8.  $^{19}\text{F}$  NMR (DMSO- $d_6$ , 471 MHz):  $\delta$  (ppm) -60.15. HRMS (ESI): exact mass calculated for  $[\text{M}+\text{H}]^+$  ( $\text{C}_{18}\text{H}_{12}\text{F}_3\text{NOS}_2$ ) requires  $m/z$  380.0385, found  $m/z$  380.0383. The enantiomeric excess was determined to be 89% by HPLC. [OD column, 254 nm, *n*-hexane:IPA = 95:5, 1.0 mL/min]: 15.6 min (minor), 20.9 min (major).  $[\alpha]_{\text{D}}^{22} = +41.8$  ( $c = 1.00$ ,  $\text{CH}_2\text{Cl}_2$ ).

**(*S*)-*S*-(1,1,1-trifluoro-2-(1*H*-indol-3-yl)hepta-2,3-dien-4-yl) ethanethioate (3ma)**

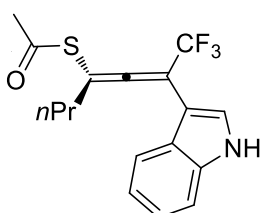

Eluent for flash column chromatography: petroleum ether/ethyl acetate = 50:1. Yellow oil, 10.1 mg, 60% yield.  $^1\text{H}$  NMR (DMSO- $d_6$ , 500 MHz):  $\delta$  (ppm) 11.68 (s, 1H), 7.74-7.72 (d,  $J = 10.0$  Hz, 1H), 7.54 (s, 1H), 7.49-7.47 (d,  $J = 8.0$  Hz, 1H), 7.22-7.18 (m, 1H), 7.12-7.08 (m, 1H), 2.55-2.47 (m, 2H), 2.43 (s, 3H), 1.56-1.51 (m, 2H), 0.91 (t,  $J = 10.0$  Hz, 3H).  $^{13}\text{C}$  NMR (DMSO- $d_6$ , 126 MHz):  $\delta$  (ppm) 204.3, 192.8, 136.9, 125.6, 125.5, 125.1, 121.8 (q,  $J = 280.0$  Hz), 122.4, 112.6, 104.8, 101.2, 97.7 (q,  $J = 43.8$  Hz), 36.9, 30.8, 20.9, 13.6.  $^{19}\text{F}$  NMR (DMSO- $d_6$ , 471 MHz):  $\delta$  (ppm) -60.59. HRMS (ESI): exact mass calculated for  $[\text{M}+\text{H}]^+$  ( $\text{C}_{17}\text{H}_{17}\text{F}_3\text{NOS}$ ) requires  $m/z$  340.0977, found  $m/z$  340.0978. The enantiomeric excess was determined to be 77% by HPLC. [OD column, 254 nm, *n*-hexane:IPA = 95:5, 1.0 mL/min]: 9.4 min (minor), 10.3 min (major).  $[\alpha]_{\text{D}}^{22} = -333.0$  ( $c = 1.00$ ,  $\text{CH}_2\text{Cl}_2$ ).

**(*S*)-*S*-(1,1,1-trifluoro-2-(1*H*-indol-3-yl)octa-2,3-dien-4-yl) ethanethioate (3na)**

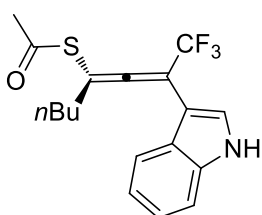

Eluent for flash column chromatography: petroleum ether/ethyl acetate = 50:1. Yellow oil, 12.4 mg, 70% yield.  $^1\text{H}$  NMR (DMSO- $d_6$ , 500 MHz):  $\delta$  (ppm) 11.67 (s, 1H), 7.73-7.71 (m, 1H), 7.53 (s, 1H), 7.49-7.47 (d,  $J = 10.0$  Hz, 1H), 7.22-7.18 (m, 1H), 7.11-7.07 (m, 1H), 2.57-2.54 (m, 1H), 2.49-2.45 (m, 1H),

2.42 (s, 3H), 1.51-1.46 (m, 2H), 1.36-1.30 (m, 2H), 0.85-0.81 (t,  $J = 10.0$  Hz, 3H).  $^{13}\text{C}$  NMR (DMSO- $d_6$ , 126 MHz):  $\delta$  (ppm) 204.2, 192.8, 136.9, 125.6, 125.5, 125.1, 122.4, 121.8 (q,  $J = 282.5$  Hz), 112.6, 104.9, 101.2, 97.8 (q,  $J = 43.8$  Hz), 34.6, 30.8, 29.6, 21.7, 14.0.  $^{19}\text{F}$  NMR (DMSO- $d_6$ , 471 MHz):  $\delta$  (ppm) -60.64. HRMS (ESI): exact mass calculated for  $[\text{M}+\text{H}]^+$  ( $\text{C}_{18}\text{H}_{19}\text{F}_3\text{NOS}$ ) requires  $m/z$  354.1134, found  $m/z$  354.1134. The enantiomeric excess was determined to be 87% by HPLC. [OD column, 254 nm,  $n$ -hexane:IPA = 98:2, 0.5 mL/min]: 27.4 min (minor), 30.2 min (major).  $[\alpha]_{\text{D}}^{22} = -286.6$  ( $c = 1.00$ ,  $\text{CH}_2\text{Cl}_2$ ).

**(S)-S-(1-cyclopropyl-4,4,4-trifluoro-3-(1H-indol-3-yl)buta-1,2-dien-1-yl)ethanethioate (30a)**

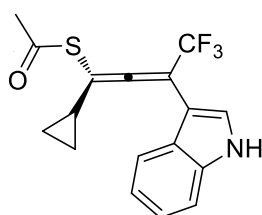

Eluent for flash column chromatography: petroleum ether/ethyl acetate = 50:1. Brown oil, 13.4 mg, 80% yield.  $^1\text{H}$  NMR (DMSO- $d_6$ , 500 MHz):  $\delta$  (ppm) 11.69 (s, 1H), 7.73-7.71 (d,  $J = 10.0$  Hz, 1H), 7.54 (s, 1H), 7.50-7.48 (m, 1H), 7.23-7.19 (m, 1H), 7.13-7.10 (m, 1H), 2.44 (s, 3H), 1.81-1.77 (m, 1H), 0.92-0.90 (m, 2H), 0.63-0.51 (m, 2H).  $^{13}\text{C}$  NMR (DMSO- $d_6$ , 126 MHz):  $\delta$  (ppm) 204.0, 192.4, 136.8, 125.6, 125.5, 124.9, 122.2, 121.8 (q,  $J = 282.5$  Hz), 112.6, 107.7, 101.3, 98.5 (q,  $J = 43.8$  Hz), 30.7, 15.2, 8.2, 7.4.  $^{19}\text{F}$  NMR (DMSO- $d_6$ , 471 MHz):  $\delta$  (ppm) -60.63. HRMS (ESI): exact mass calculated for  $[\text{M}+\text{H}]^+$  ( $\text{C}_{17}\text{H}_{15}\text{F}_3\text{NOS}$ ) requires  $m/z$  338.0821, found  $m/z$  338.0819. The enantiomeric excess was determined to be 80% by HPLC. [OD column, 254 nm,  $n$ -hexane:IPA = 95:5, 1.0 mL/min]: 12.2 min (minor), 14.2 min (major).  $[\alpha]_{\text{D}}^{22} = -336.7$  ( $c = 1.00$ ,  $\text{CH}_2\text{Cl}_2$ ).

**(S)-S-(4,4,4-trifluoro-3-(5-fluoro-1H-indol-3-yl)-1-phenylbuta-1,2-dien-1-yl)ethanethioate (3pa)**

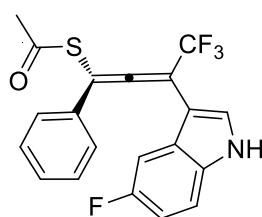

Eluent for flash column chromatography: petroleum ether/ethyl acetate = 50:1. Brown oil, 17.6 mg, 90% yield.  $^1\text{H}$  NMR (DMSO- $d_6$ , 500 MHz):  $\delta$  (ppm) 11.92 (s, 1H), 7.74 (s, 1H), 7.59-7.57 (m, 2H), 7.53-7.46 (m, 3H), 7.43-7.36 (m, 2H), 7.08-7.03 (m, 1H), 2.51 (s, 3H).  $^{13}\text{C}$  NMR (DMSO- $d_6$ , 126 MHz):  $\delta$  (ppm) 207.3, 192.0, 158.1 (d,  $J = 195.3$  Hz), 133.6, 132.9, 129.8, 129.7, 128.1, 127.1, 125.5 (d,  $J = 8.8$  Hz), 123.5 (q,  $J = 230.6$  Hz), 114.0 (d,  $J = 7.5$  Hz), 111.4 (d,  $J = 21.3$  Hz), 105.9, 104.3 (d,  $J = 20.2$  Hz), 100.7, 99.3 (q,  $J = 43.8$  Hz), 30.9.  $^{19}\text{F}$  NMR (DMSO- $d_6$ , 471 MHz):  $\delta$  (ppm) -60.22, -122.08. HRMS (ESI): exact mass calculated for  $[\text{M}+\text{H}]^+$  ( $\text{C}_{20}\text{H}_{14}\text{F}_4\text{NOS}$ ) requires  $m/z$  392.0727, found  $m/z$  392.0724. The enantiomeric excess was determined to be 90% by HPLC. [AS column, 254 nm,  $n$ -hexane:IPA = 95:5, 0.8 mL/min]: 18.9 min (minor), 21.1 min (major).  $[\alpha]_{\text{D}}^{22} = +95.8$  ( $c = 1.00$ ,  $\text{CH}_2\text{Cl}_2$ ).

**(S)-S-(3-(5-chloro-1H-indol-3-yl)-4,4,4-trifluoro-1-phenylbuta-1,2-dien-1-yl)ethanethioate (3qa)**



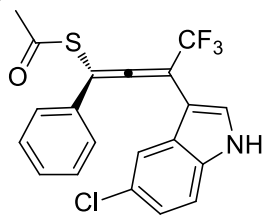

Eluent for flash column chromatography: petroleum ether/ethyl acetate = 50:1. Yellow solid, 15.7 mg, 77% yield.  $^1\text{H}$  NMR (DMSO- $d_6$ , 500 MHz):  $\delta$  (ppm) 11.98 (s, 1H), 7.74 (s, 1H), 7.62 (s, 1H), 7.58-7.55 (m, 2H), 7.52-7.46 (m, 3H), 7.44-7.40 (m, 1H), 7.22-7.19 (m, 1H), 2.52 (s, 3H).  $^{13}\text{C}$  NMR (DMSO- $d_6$ , 126 MHz):  $\delta$  (ppm) 207.4, 191.8, 135.4, 132.8, 129.9, 129.8, 127.8, 127.1, 126.3, 124.3, 122.5, 120.9 (q,  $J$  = 308.8 Hz), 114.4, 105.9, 100.4, 99.0 (q,  $J$  = 30.0 Hz), 30.9.  $^{19}\text{F}$  NMR (DMSO- $d_6$ , 471 MHz):  $\delta$  (ppm) -60.31. HRMS (ESI): exact mass calculated for  $[\text{M}-\text{H}]^-$  ( $\text{C}_{20}\text{H}_{12}\text{ClF}_3\text{NOS}$ ) requires  $m/z$  406.0275, found  $m/z$  406.0286. The enantiomeric excess was determined to be 86% by HPLC. [AS column, 254 nm, *n*-hexane:IPA = 95:5, 1.0 mL/min]: 14.9 min (minor), 18.5 min (major).  $[\alpha]_{\text{D}}^{22} = +219.1$  ( $c$  = 1.00,  $\text{CH}_2\text{Cl}_2$ ).

**(S)-S-(3-(5-bromo-1H-indol-3-yl)-4,4,4-trifluoro-1-phenylbuta-1,2-dien-1-yl) ethanethioate (3ra)**

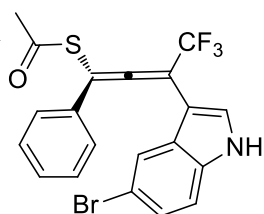

Eluent for flash column chromatography: petroleum ether/ethyl acetate = 50:1. Yellow solid, 18.0 mg, 80% yield. mp 100.7-102.5 °C.  $^1\text{H}$  NMR (DMSO- $d_6$ , 500 MHz):  $\delta$  (ppm) 11.99 (s, 1H), 7.76-7.72 (m, 2H), 7.57-7.55 (d,  $J$  = 10.0 Hz, 2H), 7.50-7.46 (m, 3H), 7.43-7.39 (m, 1H), 7.33-7.30 (m, 1H), 2.52 (s, 3H).  $^{13}\text{C}$  NMR (DMSO- $d_6$ , 126 MHz):  $\delta$  (ppm) 207.4, 191.7, 135.7, 129.8, 128.4 (q,  $J$  = 330.1 Hz), 127.6, 127.0, 124.3, 122.5, 121.6, 114.8, 113.6, 105.9, 100.4, 99.0 (q,  $J$  = 28.8 Hz), 30.9.  $^{19}\text{F}$  NMR (DMSO- $d_6$ , 471 MHz):  $\delta$  (ppm) -60.35. HRMS (ESI): exact mass calculated for  $[\text{M}-\text{H}]^-$  ( $\text{C}_{20}\text{H}_{12}\text{BrF}_3\text{NOS}$ ) requires  $m/z$  449.9770, found  $m/z$  449.9782. The enantiomeric excess was determined to be 90% by HPLC. [AS column, 254 nm, *n*-hexane:IPA = 95:5, 1.0 mL/min]: 15.4 min (minor), 20.3 min (major).  $[\alpha]_{\text{D}}^{22} = +255.2$  ( $c$  = 1.00,  $\text{CH}_2\text{Cl}_2$ ).

**(S)-S-(4,4,4-trifluoro-3-(5-methyl-1H-indol-3-yl)-1-phenylbuta-1,2-dien-1-yl) ethanethioate (3sa)**

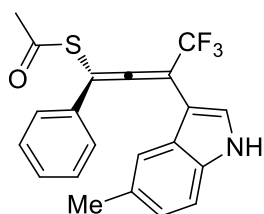

Eluent for flash column chromatography: petroleum ether/ethyl acetate = 50:1. Yellow solid, 16.6 mg, 86% yield. mp 129.1-131.0 °C.  $^1\text{H}$  NMR (DMSO- $d_6$ , 500 MHz):  $\delta$  (ppm) 11.66 (s, 1H), 7.59-7.55 (m, 3H), 7.49-7.45 (m, 3H), 7.42-7.36 (m, 2H), 7.03-7.00 (m, 1H), 2.51 (s, 3H), 2.27 (s, 3H).  $^{13}\text{C}$  NMR (DMSO- $d_6$ , 126 MHz):  $\delta$  (ppm) 207.7, 192.1, 135.2, 133.3, 129.6, 129.5, 127.1, 126.1, 126.0, 124.9, 122.3 (q,  $J$  = 285.0 Hz) 122.2, 112.4, 105.5, 99.9, 99.5 (q,  $J$  = 42.5 Hz), 30.8, 21.6.  $^{19}\text{F}$  NMR (DMSO- $d_6$ , 471 MHz):  $\delta$  (ppm) -60.14. HRMS (ESI): exact mass calculated for  $[\text{M}+\text{H}]^+$  ( $\text{C}_{21}\text{H}_{17}\text{F}_3\text{NOS}$ ) requires  $m/z$  388.0977, found  $m/z$  388.0976. The enantiomeric excess was determined to be 88% by HPLC. [AS column, 254 nm, *n*-hexane:IPA = 97:3, 0.5 mL/min]: 30.1 min (minor), 31.9 min (major).  $[\alpha]_{\text{D}}^{22} = +182.8$  ( $c$  = 1.00,  $\text{CH}_2\text{Cl}_2$ ).

**(S)-S-(4,4,4-trifluoro-3-(6-fluoro-1H-indol-3-yl)-1-phenylbuta-1,2-dien-1-yl)ethanethioate (3ta)**

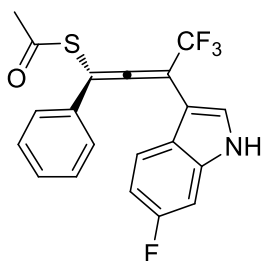

Eluent for flash column chromatography: petroleum ether/ethyl acetate = 50:1. Yellow oil, 15.6 mg, 80% yield.  $^1\text{H}$  NMR (DMSO- $d_6$ , 500 MHz):  $\delta$  (ppm) 11.85 (s, 1H), 7.67-7.62 (m, 2H), 7.58-7.56 (m, 2H), 7.49-7.38 (m, 3H), 7.30-7.27 (m, 1H), 6.94-6.89 (m, 1H), 2.51 (s, 3H).  $^{13}\text{C}$  NMR (DMSO- $d_6$ , 126 MHz):  $\delta$  (ppm) 207.4, 192.0, 159.9 (d,  $J = 197.8$  Hz), 137.1 (d,  $J = 10.0$  Hz), 132.8, 129.8, 129.7, 127.2, 126.9, 123.5 (q,  $J = 228.8$  Hz), 122.0, 120.4 (d,  $J = 7.0$  Hz), 109.5 (d,  $J = 20.0$  Hz), 105.7, 100.8, 98.9 (q,  $J = 28.8$  Hz), 30.9.  $^{19}\text{F}$  NMR (DMSO- $d_6$ , 471 MHz):  $\delta$  (ppm) -60.16, -119.83. HRMS (ESI): exact mass calculated for  $[\text{M}+\text{H}]^+$  ( $\text{C}_{20}\text{H}_{14}\text{F}_4\text{NOS}$ ) requires  $m/z$  392.0727, found  $m/z$  392.0727. The enantiomeric excess was determined to be 89% by HPLC. [IA column, 254 nm, *n*-hexane:IPA = 97:3, 0.5 mL/min]: 26.8 min (minor), 27.9 min (major).  $[\alpha]_D^{22} = +117.4$  ( $c = 1.00$ ,  $\text{CH}_2\text{Cl}_2$ ).

**(S)-S-(4,4,4-trifluoro-3-(6-methyl-1H-indol-3-yl)-1-phenylbuta-1,2-dien-1-yl)ethanethioate (3ua)**

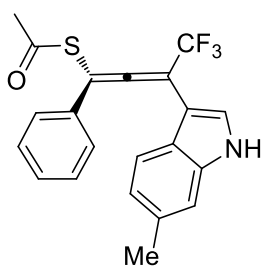

Eluent for flash column chromatography: petroleum ether/ethyl acetate = 50:1. Yellow oil, 16.6 mg, 86% yield.  $^1\text{H}$  NMR (DMSO- $d_6$ , 500 MHz):  $\delta$  (ppm) 11.64 (s, 1H), 7.57-7.53 (m, 4H), 7.48-7.44 (m, 2H), 7.42-7.38 (m, 1H), 7.27 (s, 1H), 6.87-6.85 (m, 1H), 2.50 (s, 3H), 2.37 (s, 3H).  $^{13}\text{C}$  NMR (DMSO- $d_6$ , 126 MHz):  $\delta$  (ppm) 207.6, 192.0, 137.4, 133.1, 132.4, 129.6, 129.6, 127.6, 127.1, 125.5, 125.4, 122.2, 121.9 (q,  $J = 232.5$  Hz), 112.4, 105.4, 100.3, 99.6 (q,  $J = 43.8$  Hz), 30.8, 21.7.  $^{19}\text{F}$  NMR (DMSO- $d_6$ , 471 MHz):  $\delta$  (ppm) -60.02. HRMS (ESI): exact mass calculated for  $[\text{M}+\text{H}]^+$  ( $\text{C}_{21}\text{H}_{17}\text{F}_3\text{NOS}$ ) requires  $m/z$  388.0977, found  $m/z$  388.0977. The enantiomeric excess was determined to be 90% by HPLC. [AS column, 254 nm, *n*-hexane:IPA = 95:5, 1.0 mL/min]: 12.8 min (minor), 13.6 min (major).  $[\alpha]_D^{22} = +93.2$  ( $c = 1.00$ ,  $\text{CH}_2\text{Cl}_2$ ).

**(S)-S-(4,4,4-trifluoro-3-(7-methyl-1H-indol-3-yl)-1-phenylbuta-1,2-dien-1-yl)ethanethioate (3va)**

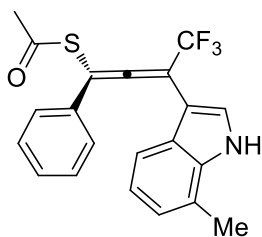

Eluent for flash column chromatography: petroleum ether/ethyl acetate = 50:1. Yellow oil, 16.1 mg, 83% yield.  $^1\text{H}$  NMR (DMSO- $d_6$ , 500 MHz):  $\delta$  (ppm) 11.80 (s, 1H), 7.61-7.56 (m, 3H), 7.50-7.44 (m, 3H), 7.41-7.37 (m, 1H), 7.00-6.92 (m, 2H), 2.50 (s, 6H).  $^{13}\text{C}$  NMR (DMSO- $d_6$ , 126 MHz):  $\delta$  (ppm) 207.7, 192.0, 136.4, 133.1, 129.7, 127.6, 127.1, 125.0, 124.5, 122.7, 122.4 (q,  $J = 260.0$  Hz), 122.1, 105.5, 101.0, 99.6 (q,  $J = 28.8$  Hz) 30.9, 17.2.  $^{19}\text{F}$  NMR (DMSO- $d_6$ , 471 MHz):  $\delta$  (ppm) -60.03. HRMS (ESI): exact mass calculated for

$[M+H]^+$  ( $C_{21}H_{17}F_3NOS$ ) requires  $m/z$  388.0977, found  $m/z$  388.0976. The enantiomeric excess was determined to be 91% by HPLC. [IA column, 254 nm, *n*-hexane:IPA = 95:5, 1.0 mL/min]: 15.6 min (minor), 12.9 min (major).  $[\alpha]_D^{22} = +57.1$  ( $c = 1.00$ ,  $CH_2Cl_2$ ).

**(S)-S-(4,4,4-trifluoro-3-(1*H*-indol-3-yl)-1-phenylbuta-1,2-dien-1-yl) benzothioate (3ab)**

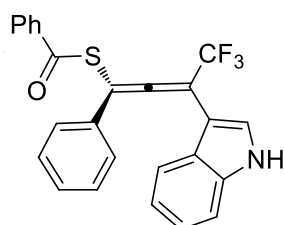

Eluent for flash column chromatography: petroleum ether/ethyl acetate = 50:1. Yellow oil, 16.3 mg, 75% yield.  $^1H$  NMR ( $DMSO-d_6$ , 500 MHz):  $\delta$  (ppm) 11.84 (s, 1H), 8.02-8.00 (m, 2H), 7.78-7.73 (m, 2H), 7.69 (s, 1H), 7.65-7.58 (m, 4H), 7.52-7.46 (m, 3H), 7.43-7.41 (m, 1H), 7.23-7.19 (m, 1H), 7.08-7.04 (m, 1H).  $^{13}C$  NMR ( $DMSO-d_6$ , 126 MHz):  $\delta$  (ppm) 208.0, 187.8, 137.0, 135.8, 135.2, 133.2, 129.9, 129.7, 127.9, 127.1, 126.4, 126.3, 124.9, 122.2, 122.1 (q,  $J = 267.5$  Hz), 112.8, 105.0, 100.4, 99.7 (q,  $J = 43.8$  Hz).  $^{19}F$  NMR ( $DMSO-d_6$ , 471 MHz):  $\delta$  (ppm) -60.10. HRMS (ESI): exact mass calculated for  $[M-H]^-$  ( $C_{25}H_{15}F_3NOS$ ) requires  $m/z$  434.8021, found  $m/z$  434.0832. The enantiomeric excess was determined to be 70% by HPLC. [IA column, 254 nm, *n*-hexane:IPA = 90:10, 1.0 mL/min]: 10.2 min (minor), 12.1 min (major).  $[\alpha]_D^{22} = -152.5$  ( $c = 1.00$ ,  $CH_2Cl_2$ ).

## D: Gram Scale Reaction

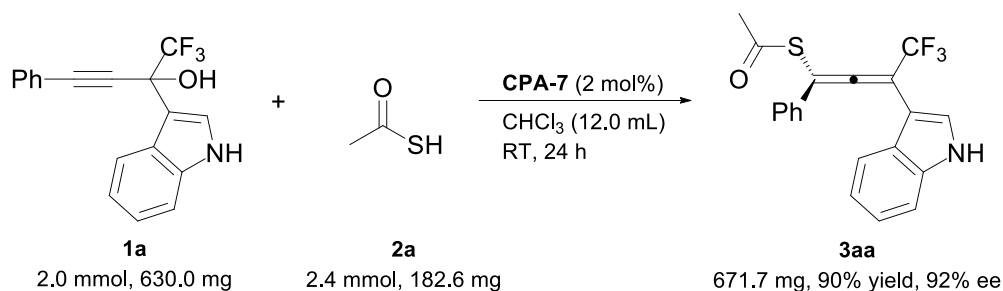

To a solution of  $\text{CHCl}_3$  (12.0 mL) were added  $\alpha$ -indolyl- $\alpha$ -trifluoromethyl propargylic alcohol **1a** (630.0 mg, 2.0 mmol), thiolacetic acid **2a** (182.6 mg, 2.4 mmol) and **CPA-7** (28.7 mg, 0.04 mmol). The reaction mixture was stirred at room temperature  $^\circ\text{C}$  for 24 h. The solvent was evaporated to give the crude product, which was purified by silica gel chromatography (PE/EA = 50:1) to provide the desired product **3aa** as a brown oil (671.7 mg, 90% yield, 92% ee).

## E: Control Experiments

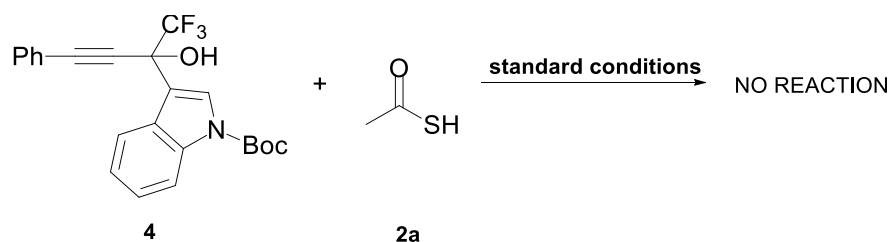

When *t*-butyloxy carbonyl protected substrate **4** was used, no desired products were observed under the optimized conditions.

## F: Limitation of The Reaction

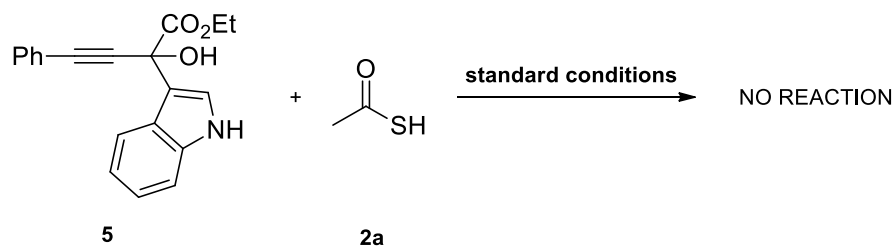

When  $\text{CF}_3$  group was replaced with ester group, substrate **5** didn't get the desired products under the optimized conditions.

## G: ESI-MS Studies

a) ESI(+)-MS spectra for the reaction of catalyst **CPA-7** and  $\alpha$ -indolyl propargylic alcohol **1a** for 1 h; b) ESI(+)-MS spectra for the 1,6-conjugate addition of  $\alpha$ -indolyl propargylic alcohol **1a** and thiolacetic acid **2a** catalyzed by catalyst **CPA-7** for 24 h. Other unidentified ions are likely to correspond to either impurities or side-reaction products.

a)

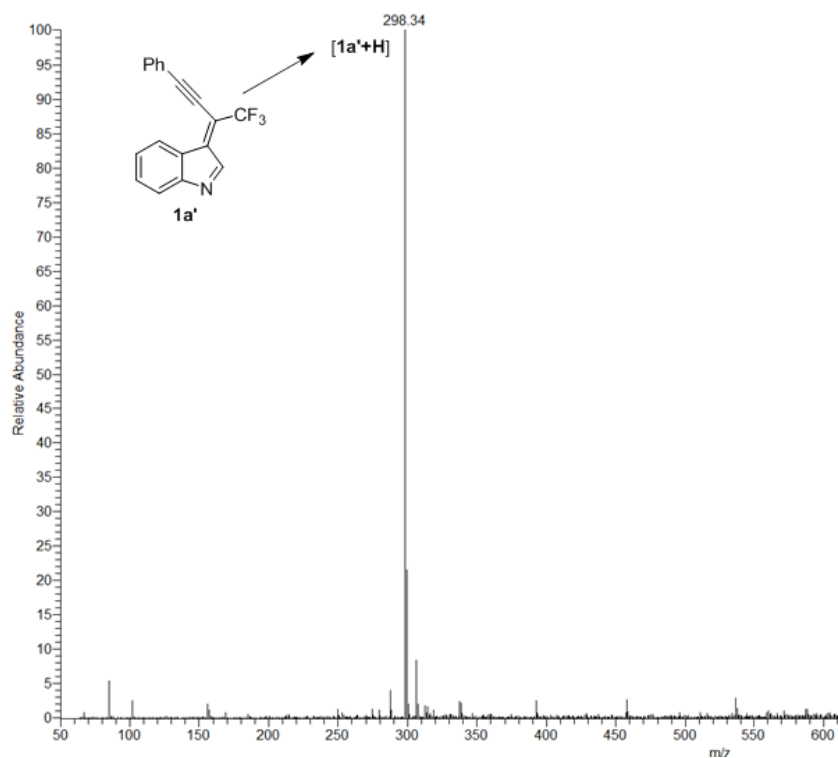

b)

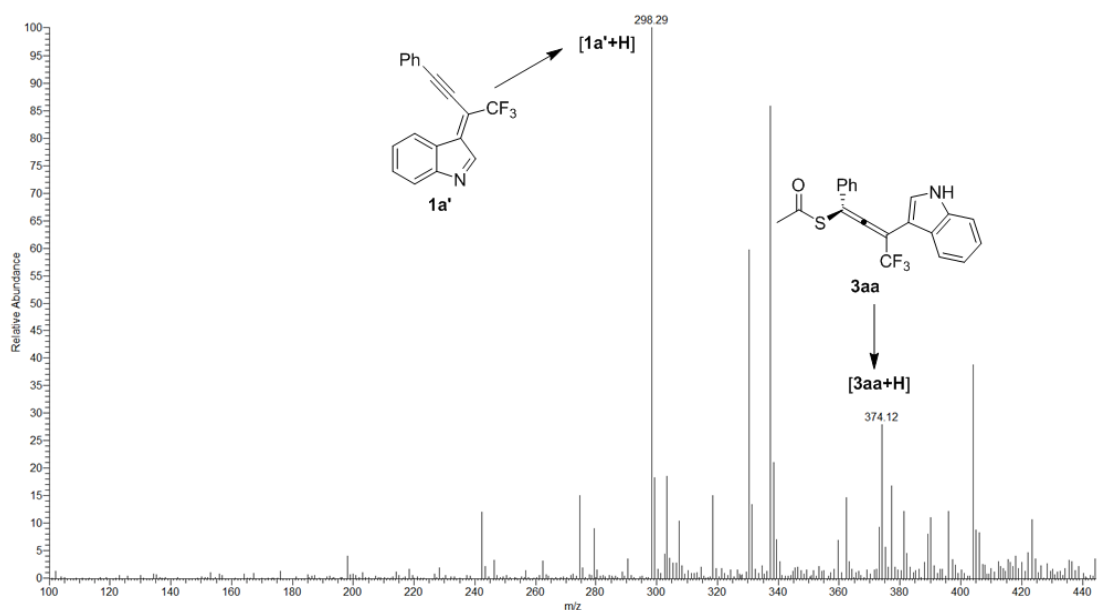

## H: Synthetic Transformations

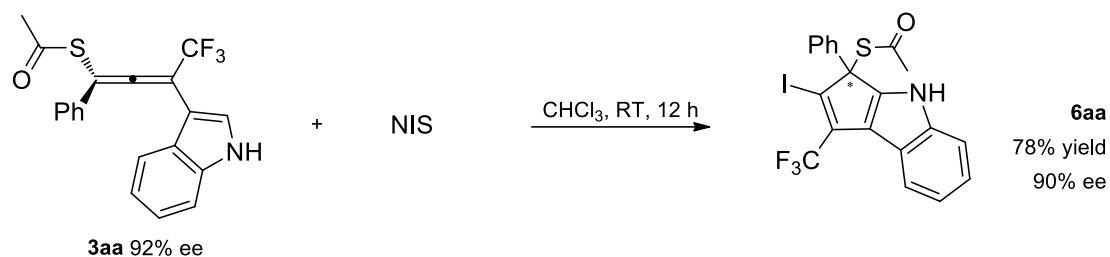

To a solution of **3aa** (37.3 mmol, 0.1 mmol) in  $\text{CHCl}_3$  (1.0 mL) was added dropwise the solution of NIS (24.7 mmol, 0.11 mmol) in  $\text{CHCl}_3$  (0.5 mL). The mixture was further stirred at room temperature for 12 h. The crude product was purified directly by flash column chromatography on silica gel to give the desired compound **6aa** as a brown oil (39.1 mg, 78% yield, 90% ee).

### **S**-(2-iodo-3-phenyl-1-(trifluoromethyl)-3,4-dihydrocyclopenta[*b*]indol-3-yl) ethanethioate (**6aa**)

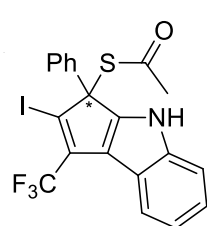

Eluent for flash column chromatography: petroleum ether/ethyl acetate = 70:1. Brown oil, 39.1 mg, 78% yield.  $^1\text{H}$  NMR ( $\text{DMSO}-d_6$ , 500 MHz):  $\delta$  (ppm) 11.45 (s, 1H), 7.56-7.54 (d,  $J = 10.0$  Hz, 2H), 7.35-7.34 (m, 3H), 7.21-7.16 (m, 2H), 7.13-7.11 (m, 2H), 2.44 (s, 3H).  $^{13}\text{C}$  NMR ( $\text{DMSO}-d_6$ , 126 MHz):  $\delta$  (ppm) 194.3, 150.9, 140.4, 134.7, 134.5, 134.2, 129.3, 128.9, 127.1, 121.6, 120.0 (q,  $J = 322.5$  Hz), 119.1, 119.0, 117.8, 114.1, 100.8 (d,  $J = 6.3$  Hz), 65.0, 30.9.  $^{19}\text{F}$  NMR ( $\text{DMSO}-d_6$ , 471 MHz):  $\delta$  (ppm) -59.68. HRMS (ESI): exact mass calculated for  $[\text{M}-\text{H}]^-$  ( $\text{C}_{20}\text{H}_{12}\text{F}_3\text{INOS}$ ) requires  $m/z$  497.9631, found  $m/z$  497.9630. The enantiomeric excess was determined to be 90% by HPLC. [OD column, 254 nm, *n*-hexane:IPA = 90:10, 0.8 mL/min]: 17.2 min (minor), 19.3 min (major).  $[\alpha]_D^{22} = +1440$  ( $c = 1.00$ ,  $\text{CH}_2\text{Cl}_2$ ).

**S-(2-iodo-3-phenyl-1-(trifluoromethyl)-3,4-dihydrocyclopenta[b]indol-3-yl) ethanethioate (6aa)**

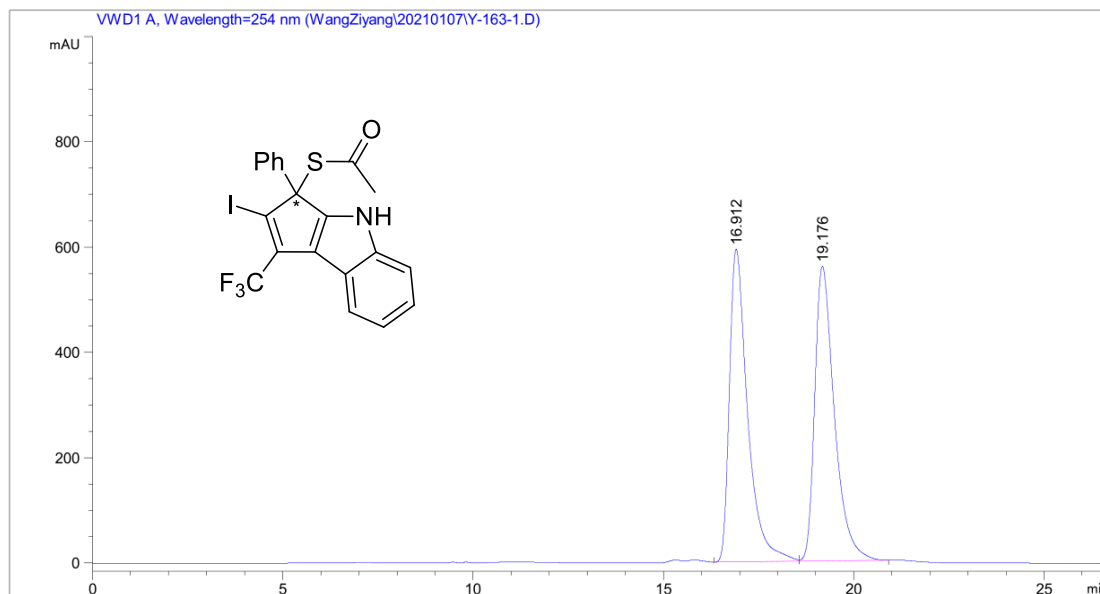

| # | Time   | Area    | Height | Width  | Symmetry | Area % |
|---|--------|---------|--------|--------|----------|--------|
| 1 | 16.912 | 19769.1 | 594.1  | 0.4962 | 0.539    | 49.589 |
| 2 | 19.176 | 20096.7 | 559.6  | 0.541  | 0.591    | 50.411 |

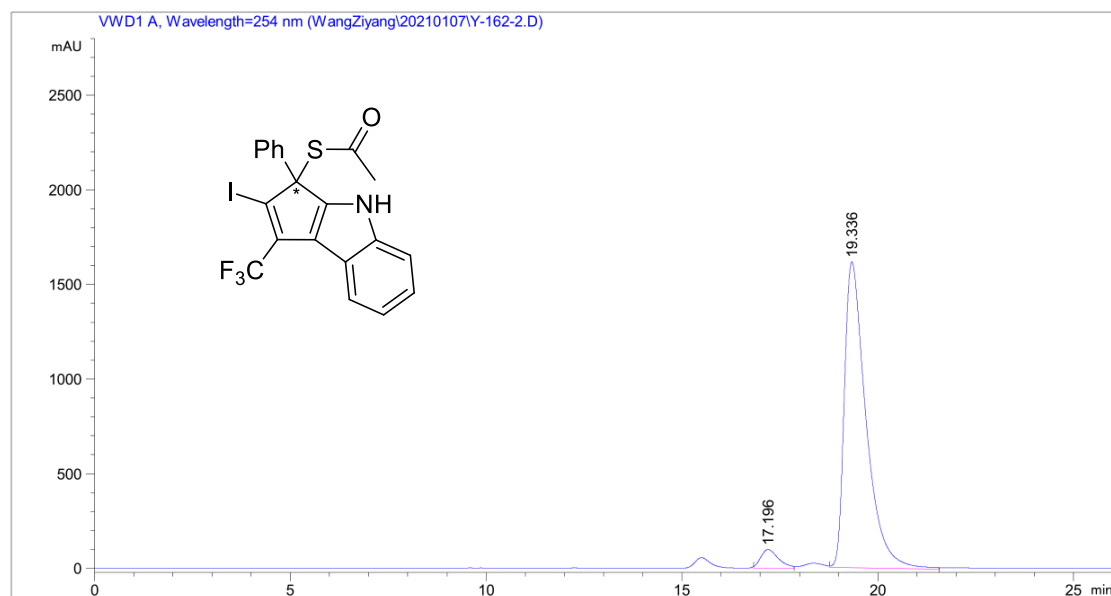

| # | Time   | Area    | Height | Width  | Symmetry | Area % |
|---|--------|---------|--------|--------|----------|--------|
| 1 | 17.196 | 3158.1  | 99.6   | 0.5287 | 0.677    | 4.844  |
| 2 | 19.336 | 62045.4 | 1615.5 | 0.6401 | 0.504    | 95.156 |

**S-(2-iodo-3-phenyl-1-(trifluoromethyl)-3,4-dihydrocyclopenta[b]indol-3-yl) ethanethioate (6aa)**

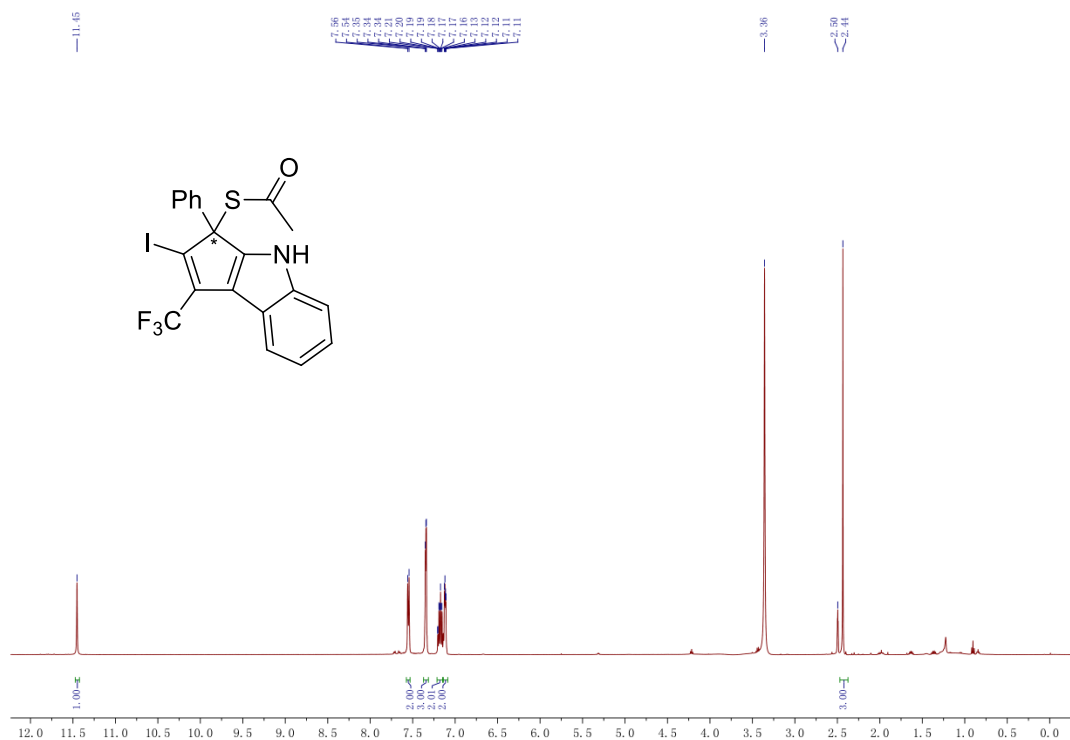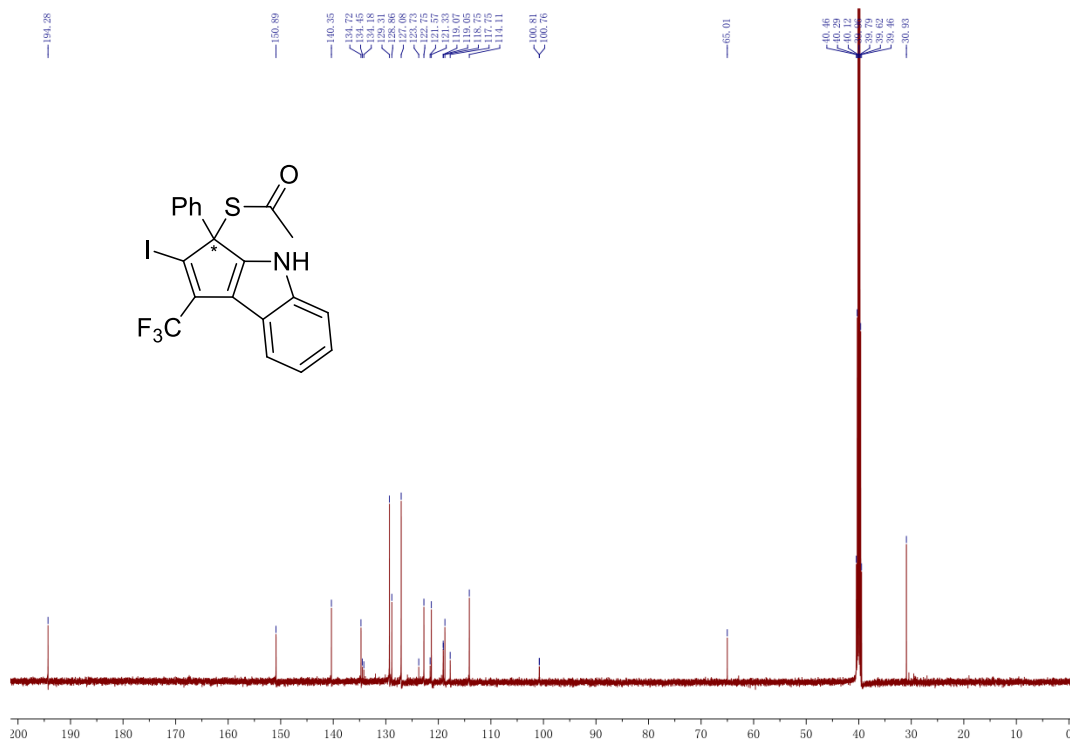



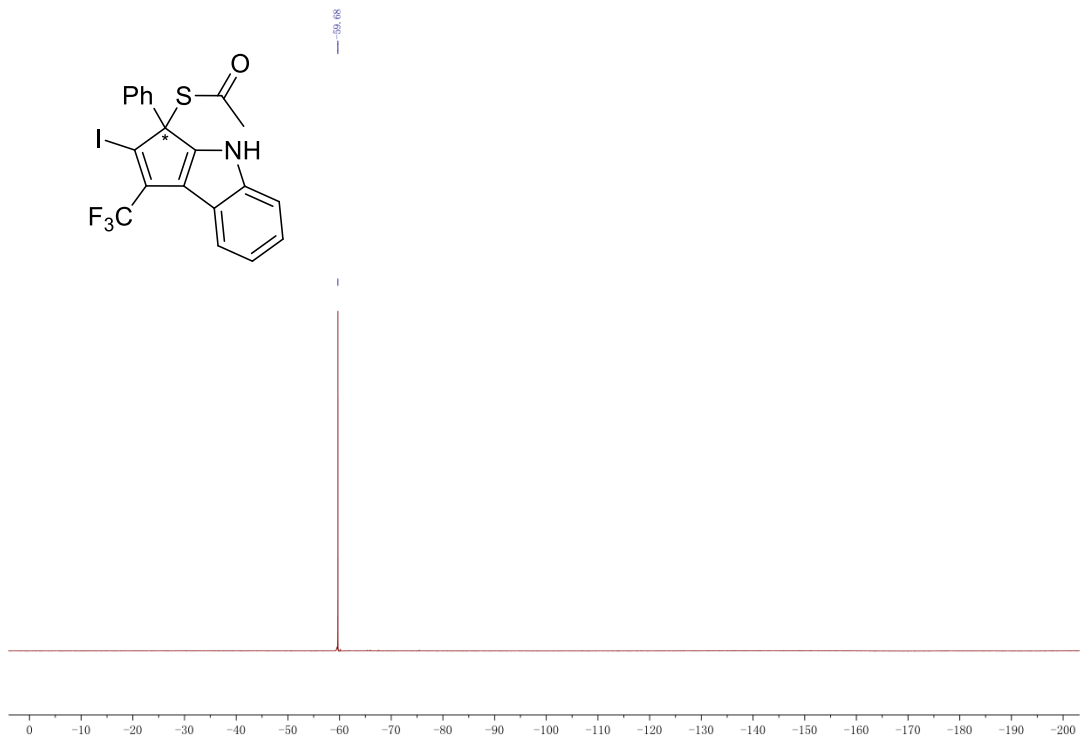

## I: HPLC Analysis

### (S)-S-(4,4,4-trifluoro-3-(1H-indol-3-yl)-1-phenylbuta-1,2-dien-1-yl) ethanethioate (3aa)

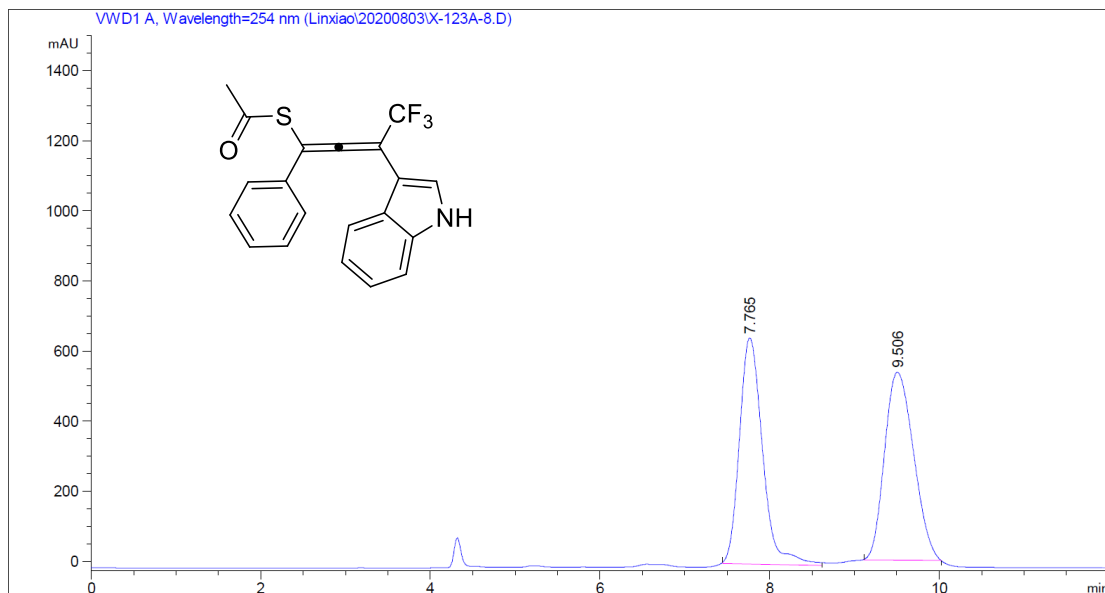

| # | Time  | Area    | Height | Width  | Symmetry | Area % |
|---|-------|---------|--------|--------|----------|--------|
| 1 | 7.765 | 12246.4 | 644.7  | 0.3166 | 0.766    | 49.021 |
| 2 | 9.506 | 12735.3 | 535.8  | 0.3962 | 0.771    | 50.979 |

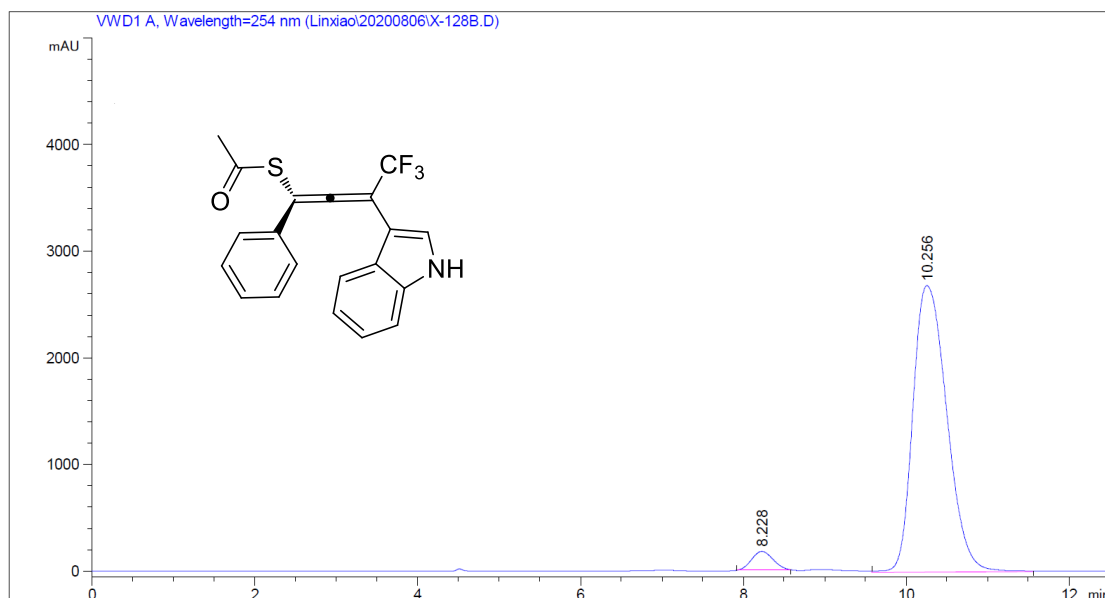

| # | Time   | Area    | Height | Width  | Symmetry | Area % |
|---|--------|---------|--------|--------|----------|--------|
| 1 | 8.228  | 3102.8  | 172.6  | 0.2995 | 0.874    | 3.834  |
| 2 | 10.256 | 77828.4 | 2685.7 | 0.483  | 0.684    | 96.166 |

**(S)-S-(1-(4-chlorophenyl)-4,4,4-trifluoro-3-(1H-indol-3-yl)buta-1,2-dien-1-yl) ethanethioate (3ba)**

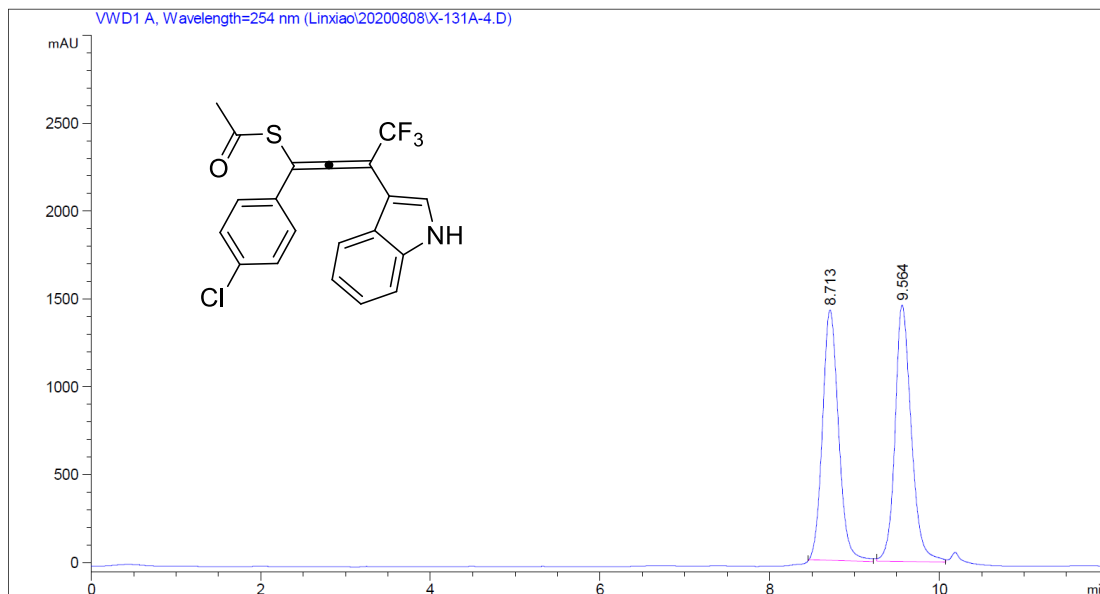

| # | Time  | Area    | Height | Width | Symmetry | Area % |
|---|-------|---------|--------|-------|----------|--------|
| 1 | 8.713 | 19069.8 | 1437.9 | 0.221 | 0.869    | 50.024 |
| 2 | 9.564 | 19051.6 | 1450.2 | 0.219 | 0.735    | 49.976 |

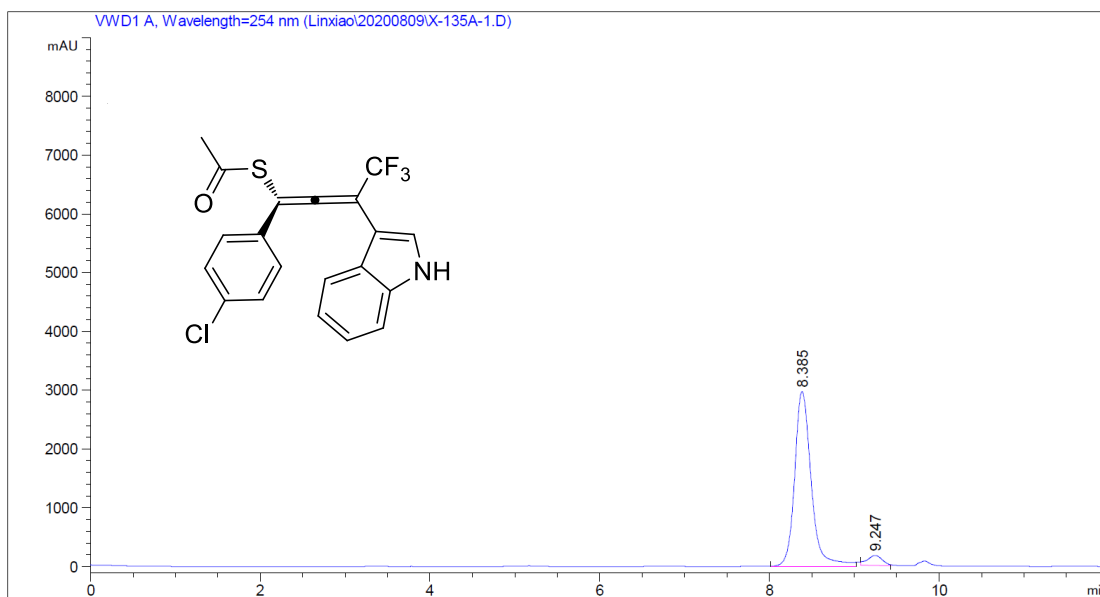

| # | Time  | Area    | Height | Width  | Symmetry | Area % |
|---|-------|---------|--------|--------|----------|--------|
| 1 | 8.385 | 40262.2 | 2971.6 | 0.2258 | 0.768    | 94.870 |
| 2 | 9.247 | 2176.9  | 173.5  | 0.2091 | 1.068    | 5.130  |

**(S)-S-(1-(4-bromophenyl)-4,4,4-trifluoro-3-(1H-indol-3-yl)buta-1,2-dien-1-yl) ethanethioate (3ca)**

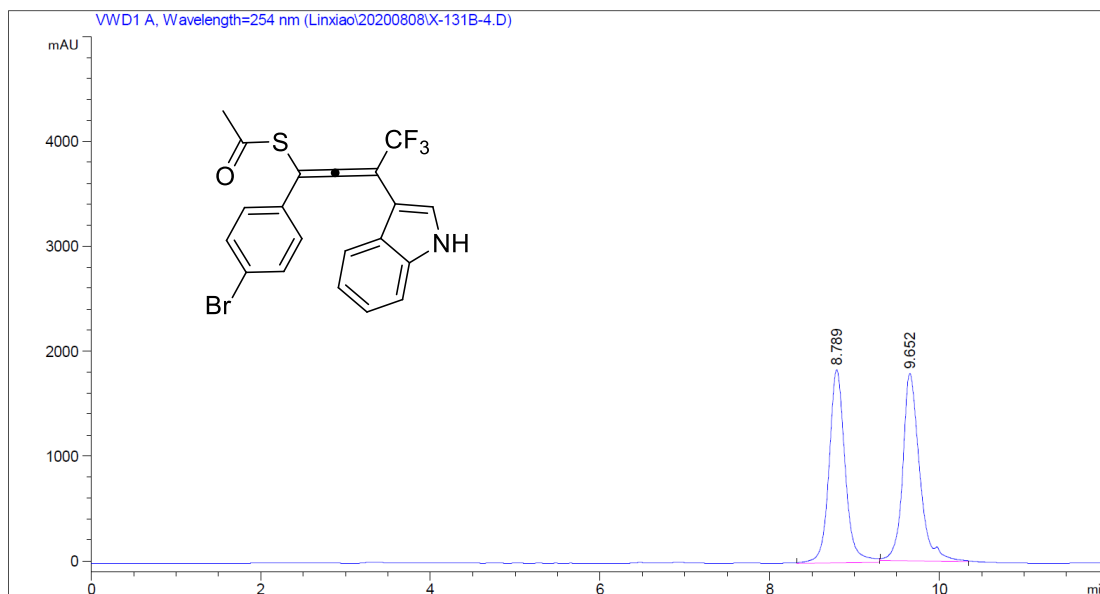

| # | Time  | Area    | Height | Width  | Symmetry | Area % |
|---|-------|---------|--------|--------|----------|--------|
| 1 | 8.789 | 24326.1 | 1842.3 | 0.2201 | 0.864    | 49.673 |
| 2 | 9.652 | 24646.2 | 1785.9 | 0.23   | 0.704    | 50.327 |

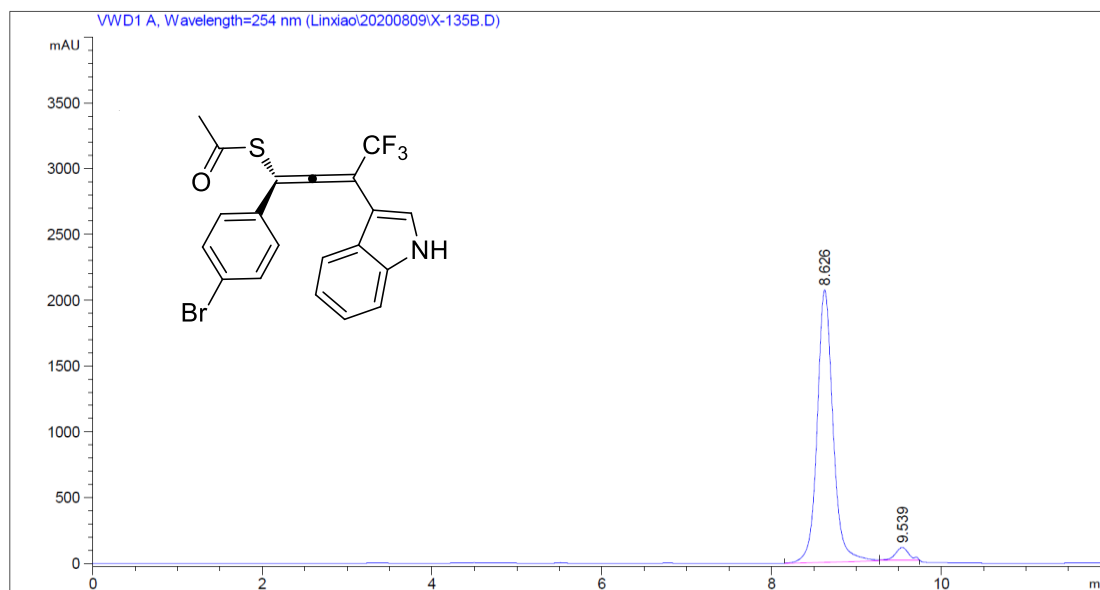

| # | Time  | Area    | Height | Width  | Symmetry | Area % |
|---|-------|---------|--------|--------|----------|--------|
| 1 | 8.626 | 26845.9 | 2070.7 | 0.2161 | 0.863    | 96.056 |
| 2 | 9.539 | 1102.2  | 97.7   | 0.188  | 0.976    | 3.944  |

**(S)-S-(4,4,4-trifluoro-3-(1H-indol-3-yl)-1-(p-tolyl)buta-1,2-dien-1-yl)ethanethioate (3da)**

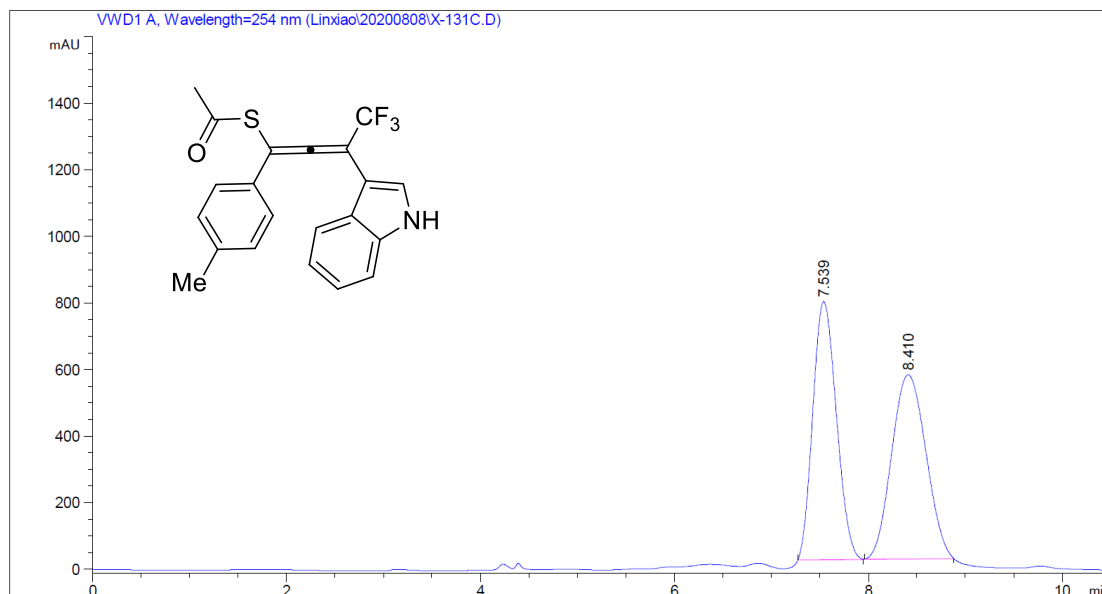

| # | Time  | Area    | Height | Width | Symmetry | Area % |
|---|-------|---------|--------|-------|----------|--------|
| 1 | 7.539 | 13061.1 | 774.5  | 0.281 | 0.827    | 49.038 |
| 2 | 8.410 | 13573.7 | 553.1  | 0.409 | 0.903    | 50.962 |

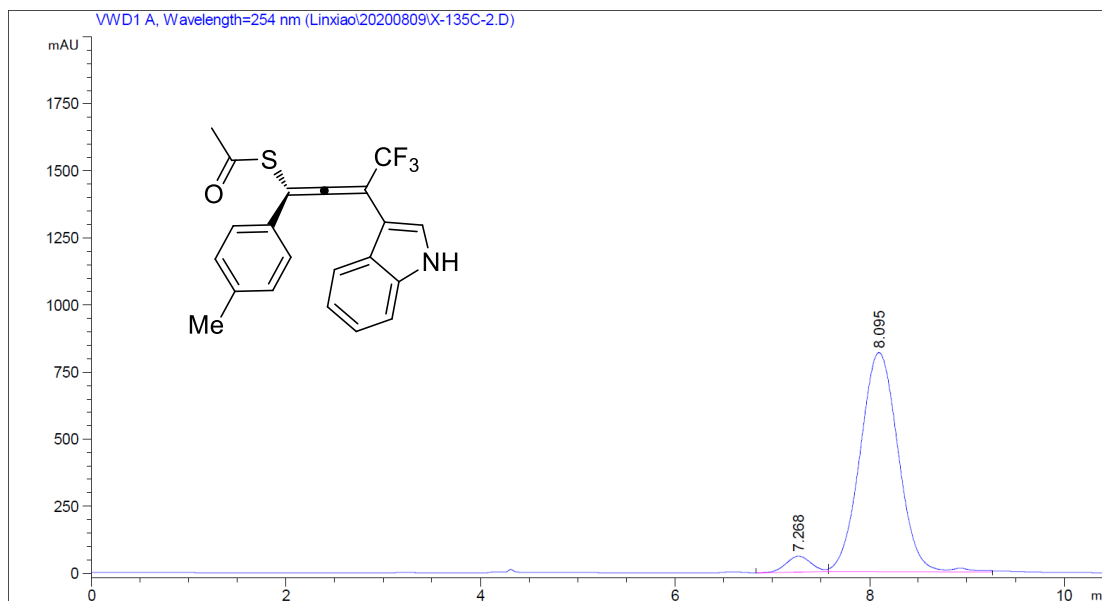

| # | Time  | Area    | Height | Width  | Symmetry | Area % |
|---|-------|---------|--------|--------|----------|--------|
| 1 | 7.268 | 1059.9  | 59.1   | 0.299  | 0.979    | 4.554  |
| 2 | 8.095 | 22217.4 | 816.4  | 0.4535 | 0.931    | 95.446 |

**(S)-S-(4,4,4-trifluoro-3-(1H-indol-3-yl)-1-(4-methoxyphenyl)buta-1,2-dien-1-yl) ethanethioate (3ea)**

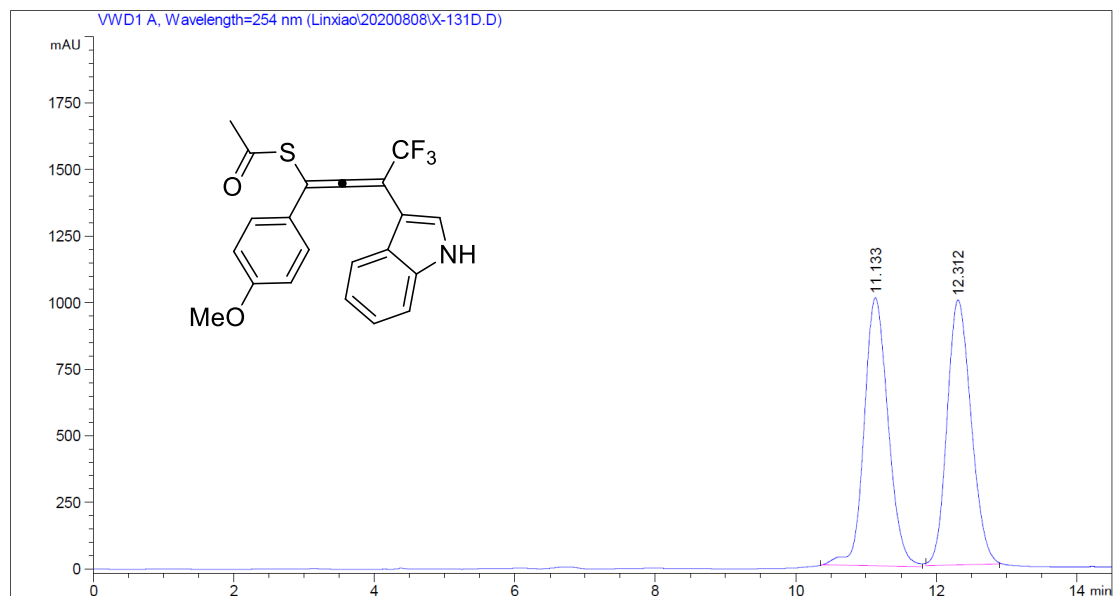

| # | Time   | Area    | Height | Width  | Symmetry | Area % |
|---|--------|---------|--------|--------|----------|--------|
| 1 | 11.133 | 23961.5 | 1007.4 | 0.3964 | 0.849    | 50.253 |
| 2 | 12.312 | 23719.8 | 995.6  | 0.3971 | 0.812    | 49.747 |

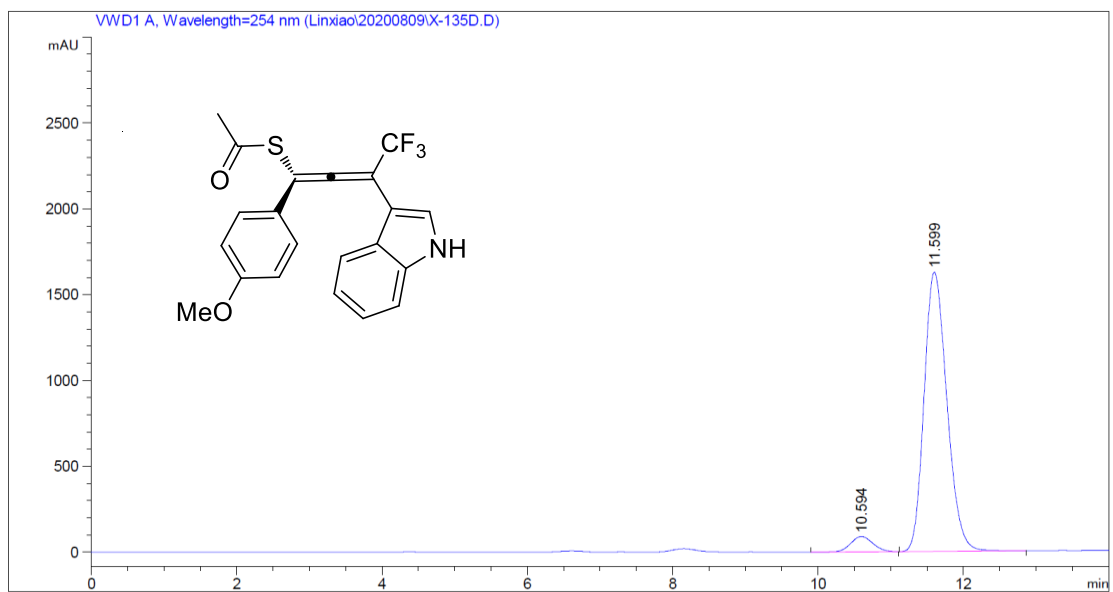

| # | Time   | Area    | Height | Width  | Symmetry | Area % |
|---|--------|---------|--------|--------|----------|--------|
| 1 | 10.594 | 1884.3  | 89.2   | 0.3304 | 0.897    | 5.047  |
| 2 | 11.599 | 35452.5 | 1626   | 0.3394 | 0.77     | 94.953 |

**(S)-S-(4,4,4-trifluoro-1-(3-fluorophenyl)-3-(1H-indol-3-yl)buta-1,2-dien-1-yl) ethanethioate (3fa)**

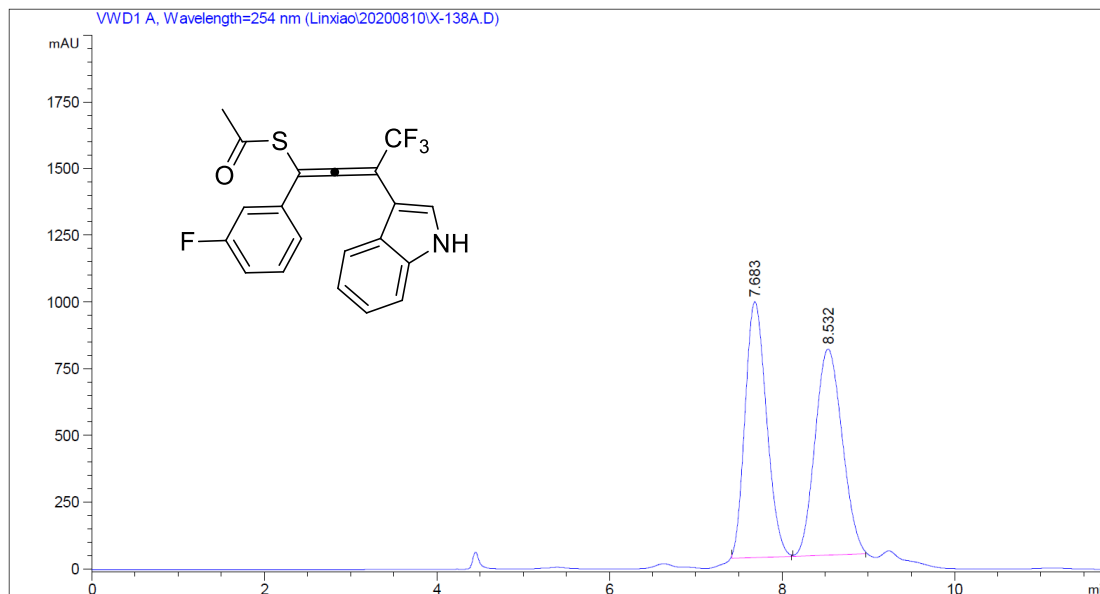

| # | Time  | Area    | Height | Width  | Symmetry | Area % |
|---|-------|---------|--------|--------|----------|--------|
| 1 | 7.683 | 16536.9 | 957.7  | 0.2878 | 0.805    | 49.519 |
| 2 | 8.532 | 16858.5 | 771.8  | 0.364  | 0.883    | 50.481 |

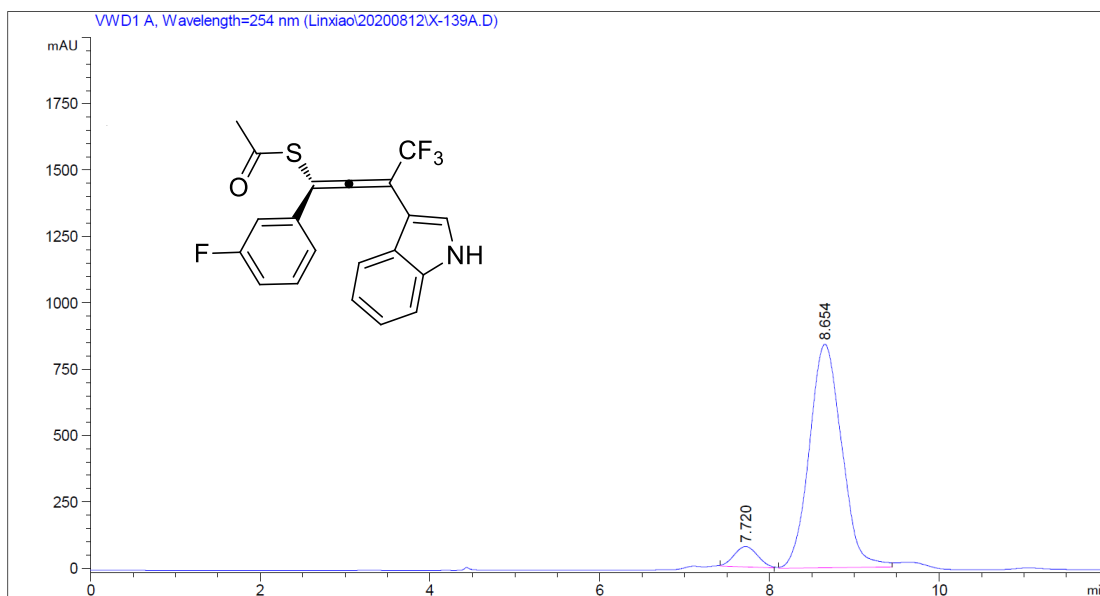

| # | Time  | Area    | Height | Width  | Symmetry | Area % |
|---|-------|---------|--------|--------|----------|--------|
| 1 | 7.72  | 1480.5  | 77     | 0.3204 | 0.919    | 6.228  |
| 2 | 8.654 | 22290.8 | 841.5  | 0.4415 | 0.884    | 93.772 |

**(S)-S-(1-(3-chlorophenyl)-4,4,4-trifluoro-3-(1H-indol-3-yl)buta-1,2-dien-1-yl) ethanethioate (3ga)**

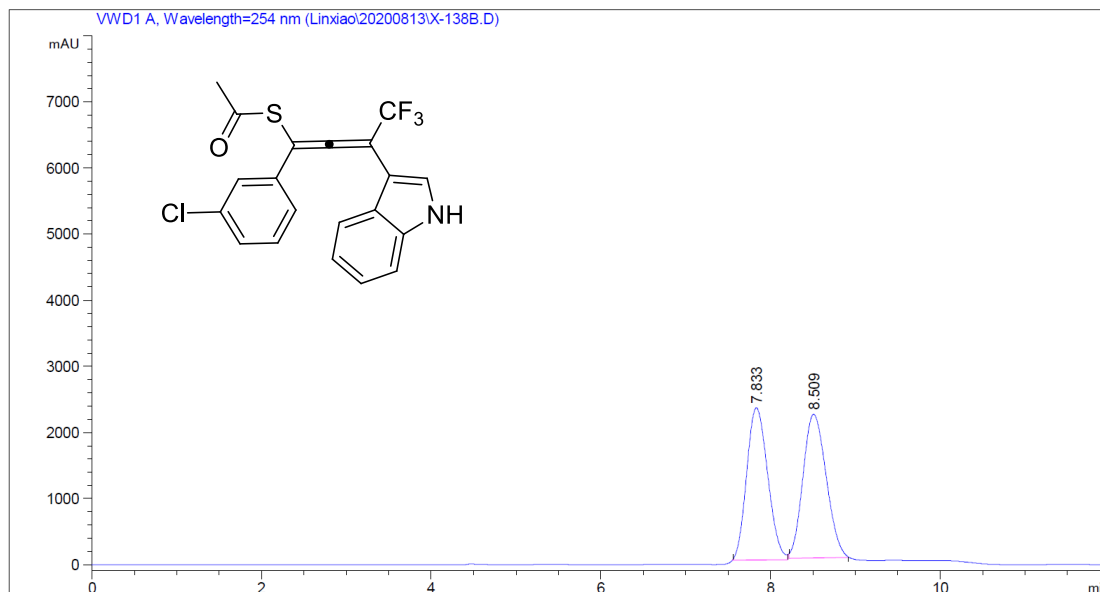

| # | Time  | Area    | Height | Width  | Symmetry | Area % |
|---|-------|---------|--------|--------|----------|--------|
| 1 | 7.833 | 39649.7 | 2300.3 | 0.2873 | 0.829    | 49.029 |
| 2 | 8.509 | 41220   | 2169.9 | 0.3166 | 0.827    | 50.971 |

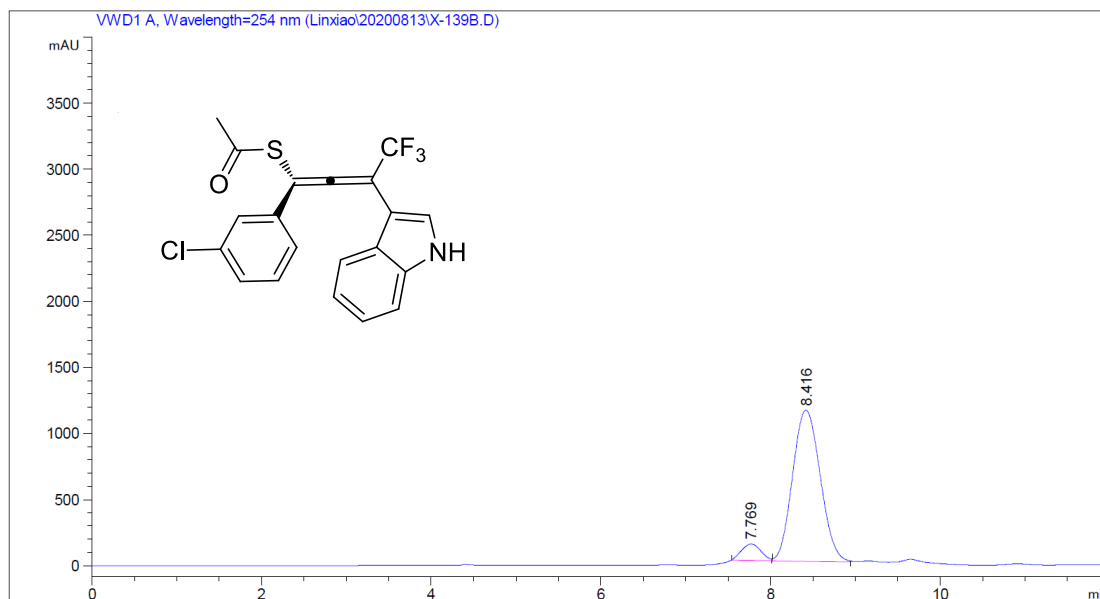

| # | Time  | Area    | Height | Width  | Symmetry | Area % |
|---|-------|---------|--------|--------|----------|--------|
| 1 | 7.769 | 1957.4  | 124    | 0.263  | 0.949    | 7.021  |
| 2 | 8.416 | 25921.7 | 1144.2 | 0.3776 | 0.893    | 92.979 |



**(S)-S-(4,4,4-trifluoro-3-(1H-indol-3-yl)-1-(*m*-tolyl)buta-1,2-dien-1-yl)ethanethioate (3ha)**

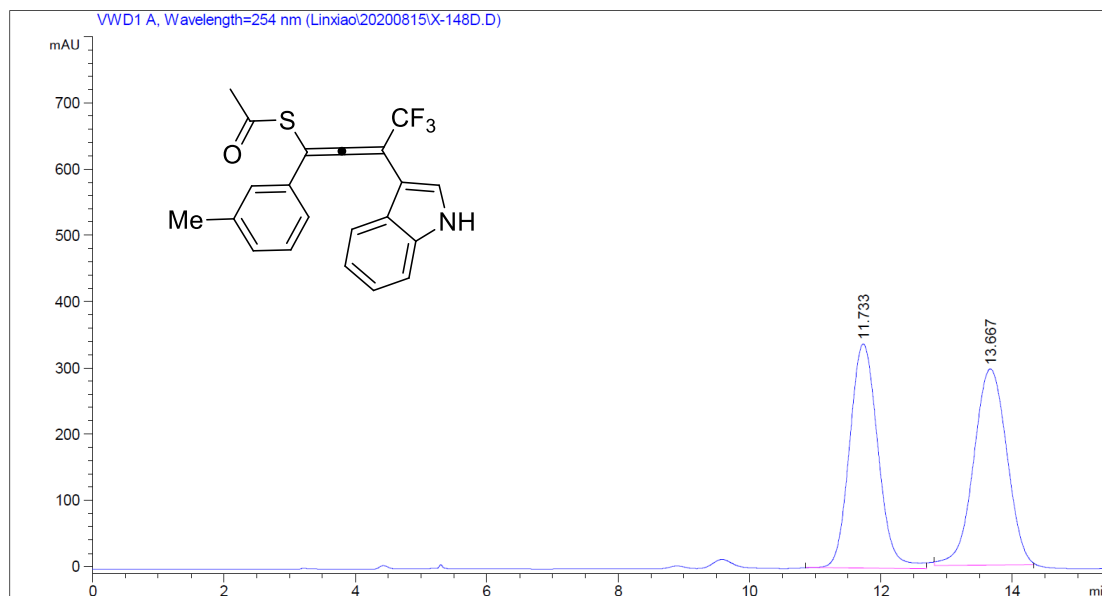

| # | Time   | Area    | Height | Width  | Symmetry | Area % |
|---|--------|---------|--------|--------|----------|--------|
| 1 | 11.733 | 10143.1 | 338.3  | 0.4997 | 0.879    | 49.447 |
| 2 | 13.667 | 10370   | 296    | 0.584  | 0.994    | 50.553 |

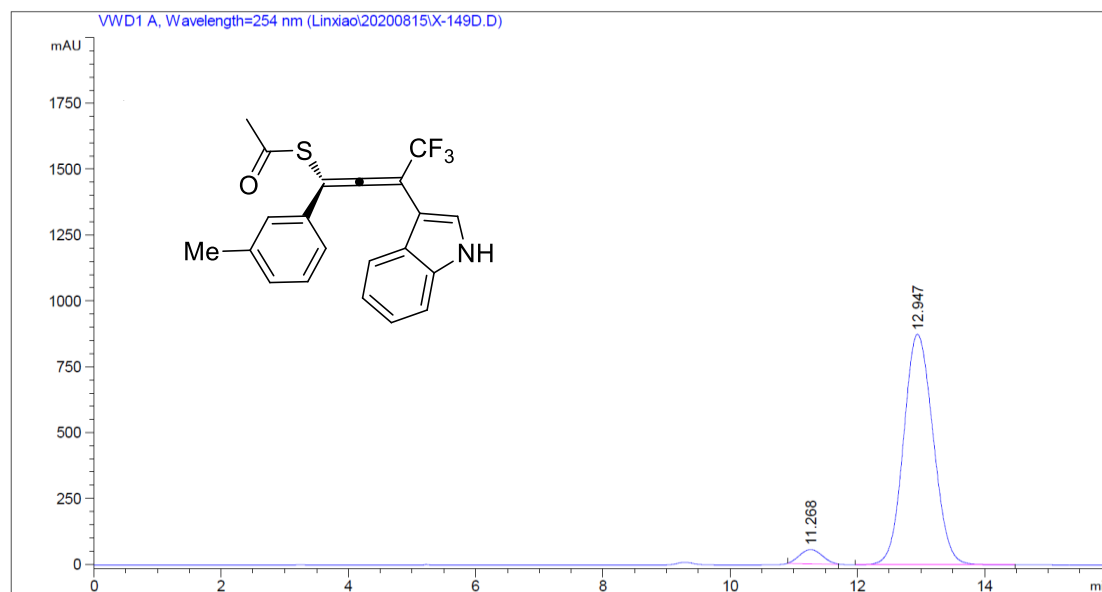

| # | Time   | Area    | Height | Width  | Symmetry | Area % |
|---|--------|---------|--------|--------|----------|--------|
| 1 | 11.268 | 1303.4  | 53.5   | 0.406  | 0.914    | 4.416  |
| 2 | 12.947 | 28207.9 | 874.8  | 0.5092 | 0.86     | 95.584 |

**(S)-S-(4,4,4-trifluoro-3-(1H-indol-3-yl)-1-(3-methoxyphenyl)buta-1,2-dien-1-yl) ethanethioate (3ia)**

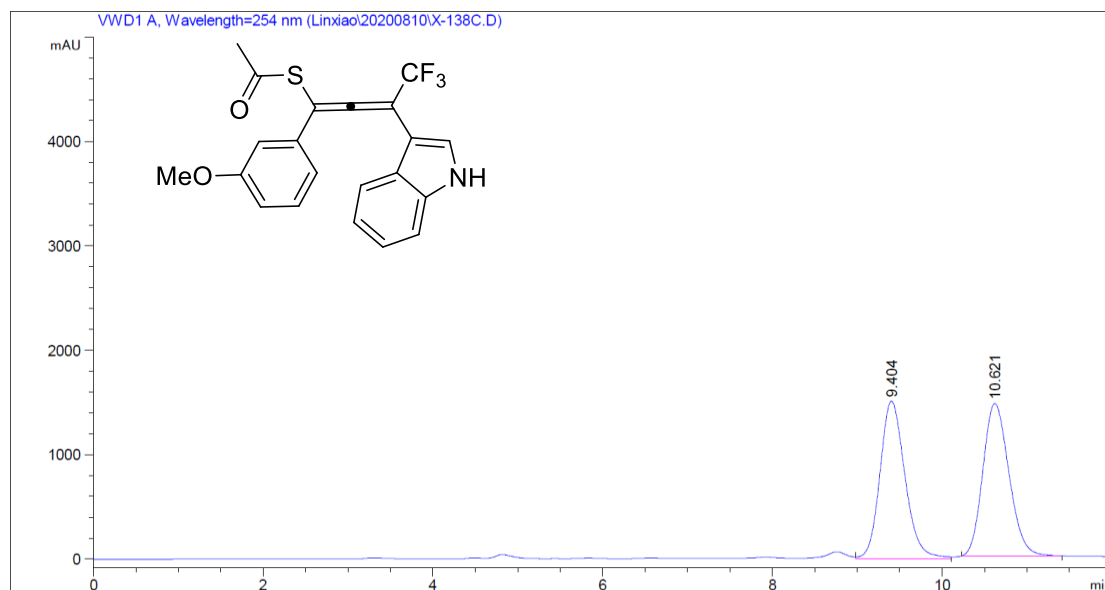

| # | Time   | Area    | Height | Width  | Symmetry | Area % |
|---|--------|---------|--------|--------|----------|--------|
| 1 | 9.404  | 30634.9 | 1506.1 | 0.339  | 0.819    | 49.315 |
| 2 | 10.621 | 31486   | 1463.9 | 0.3585 | 0.812    | 50.685 |

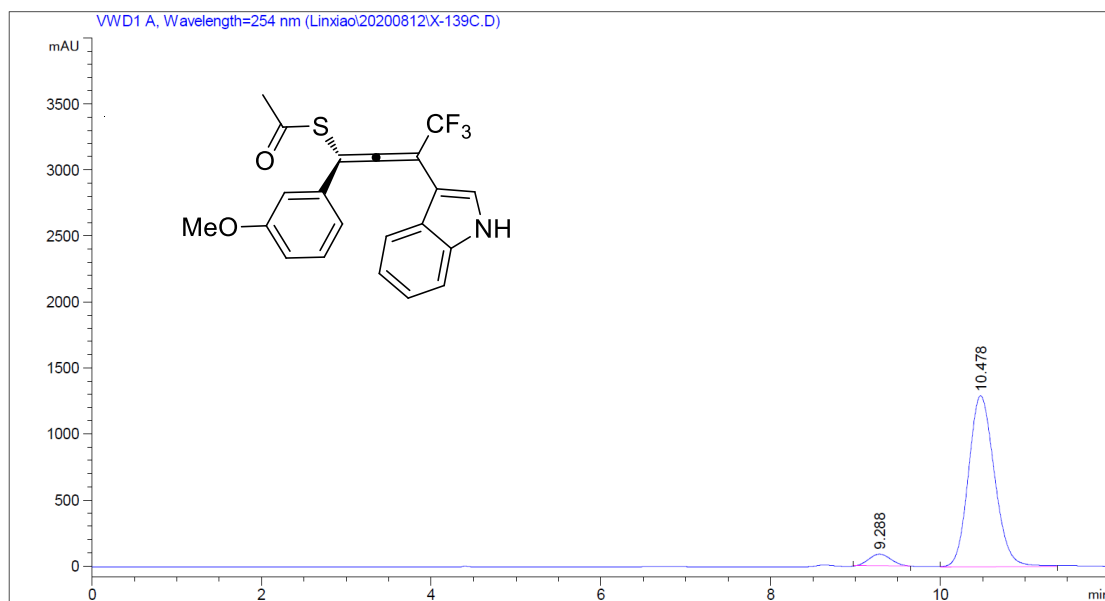

| # | Time   | Area    | Height | Width  | Symmetry | Area % |
|---|--------|---------|--------|--------|----------|--------|
| 1 | 9.288  | 1586.5  | 88.7   | 0.298  | 0.901    | 5.414  |
| 2 | 10.478 | 27719.1 | 1296.3 | 0.3564 | 0.832    | 94.586 |

**(S)-S-(4,4,4-trifluoro-1-(2-fluorophenyl)-3-(1H-indol-3-yl)buta-1,2-dien-1-yl) ethanethioate (3ja)**

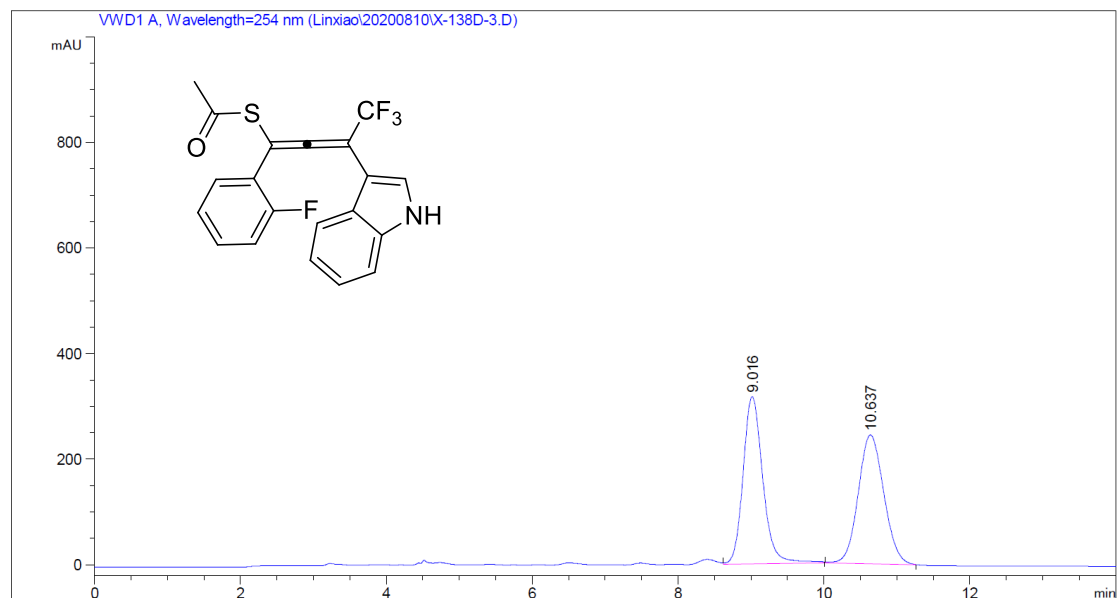

| # | Time   | Area   | Height | Width  | Symmetry | Area % |
|---|--------|--------|--------|--------|----------|--------|
| 1 | 9.016  | 5959.8 | 316.8  | 0.3135 | 0.806    | 50.044 |
| 2 | 10.637 | 5949.3 | 244.1  | 0.4062 | 0.887    | 49.956 |

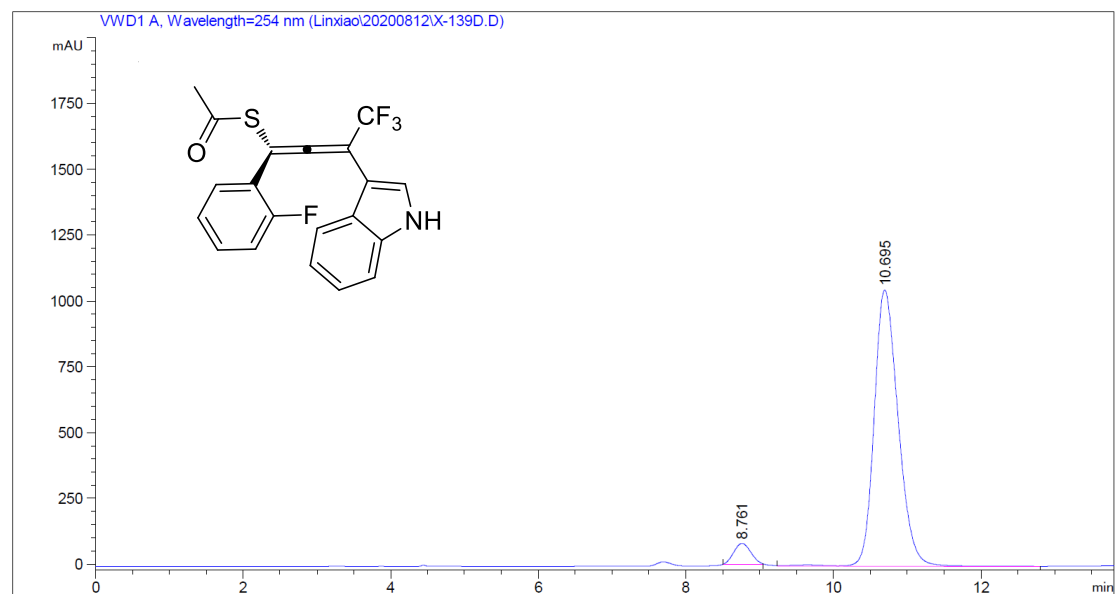

| # | Time   | Area    | Height | Width  | Symmetry | Area % |
|---|--------|---------|--------|--------|----------|--------|
| 1 | 8.761  | 1260.8  | 78.9   | 0.2664 | 0.92     | 5.030  |
| 2 | 10.695 | 23807.3 | 1049.1 | 0.3782 | 0.759    | 94.970 |

**(S)-S-(1-(2-chlorophenyl)-4,4,4-trifluoro-3-(1H-indol-3-yl)buta-1,2-dien-1-yl) ethanethioate (3ka)**

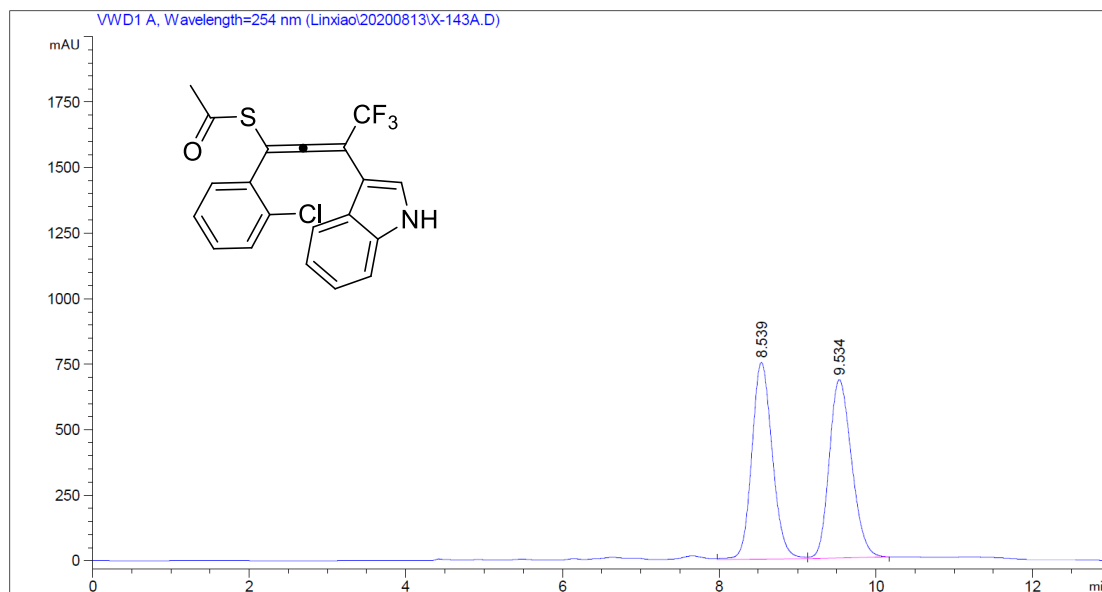

| # | Time  | Area    | Height | Width  | Symmetry | Area % |
|---|-------|---------|--------|--------|----------|--------|
| 1 | 8.539 | 13649.7 | 750.5  | 0.3031 | 0.845    | 50.207 |
| 2 | 9.534 | 13537.3 | 680.5  | 0.3316 | 0.788    | 49.793 |

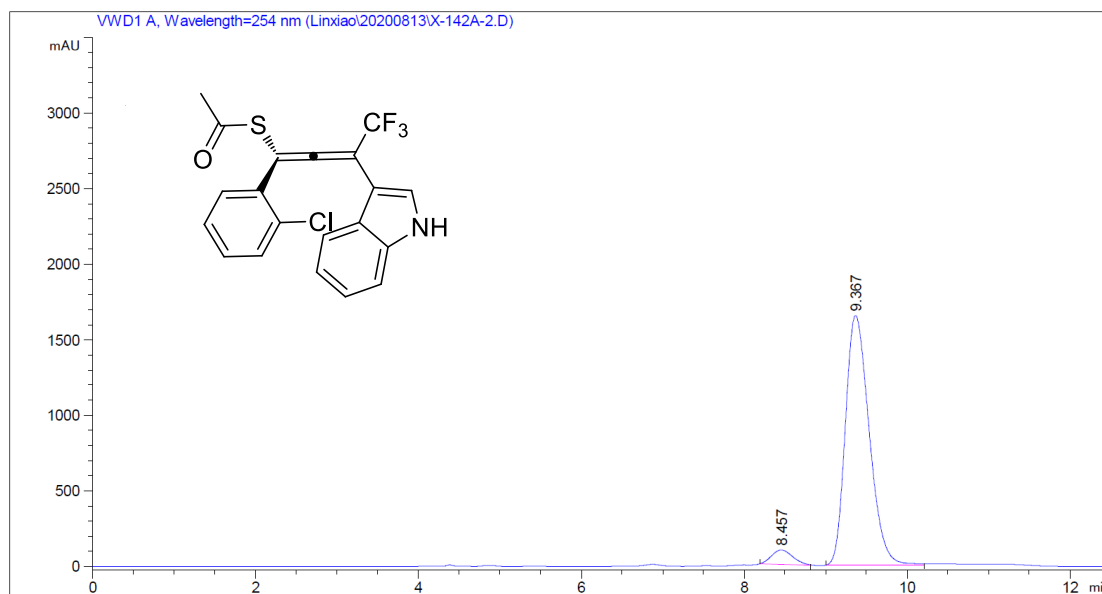

| # | Time  | Area    | Height | Width  | Symmetry | Area % |
|---|-------|---------|--------|--------|----------|--------|
| 1 | 8.457 | 1680.1  | 94.6   | 0.2958 | 0.82     | 4.758  |
| 2 | 9.367 | 33632.9 | 1653.2 | 0.3391 | 0.716    | 95.242 |

**(S)-S-(4,4,4-trifluoro-3-(1H-indol-3-yl)-1-(thiophen-3-yl)buta-1,2-dien-1-yl) ethanethioate (3la)**

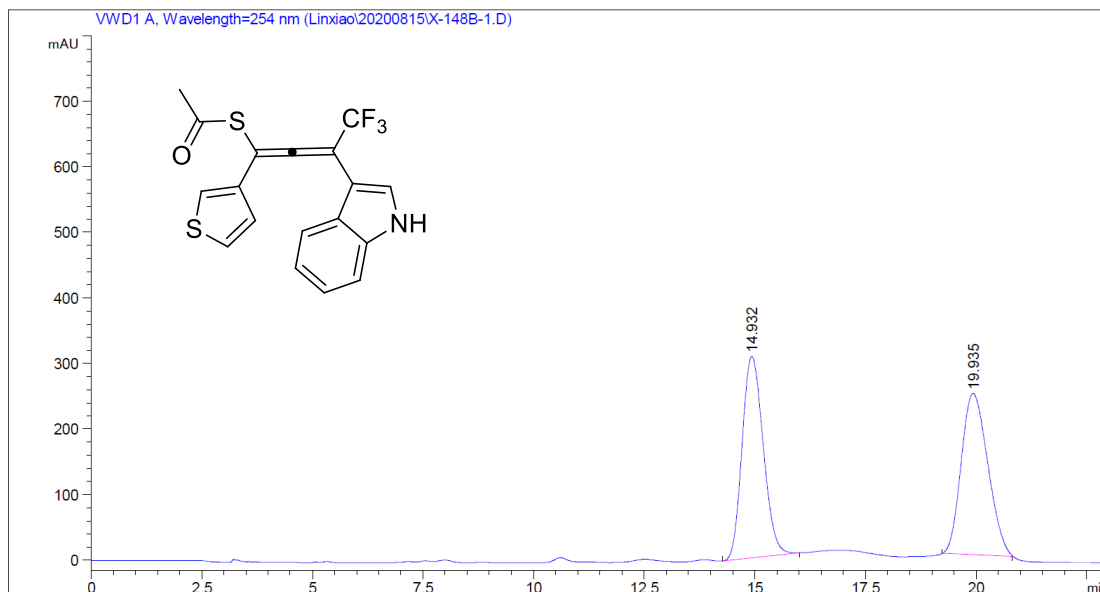

| # | Time   | Area    | Height | Width  | Symmetry | Area % |
|---|--------|---------|--------|--------|----------|--------|
| 1 | 14.932 | 10209.7 | 307.3  | 0.5226 | 0.807    | 49.862 |
| 2 | 19.935 | 10266   | 246.1  | 0.6954 | 0.776    | 50.138 |

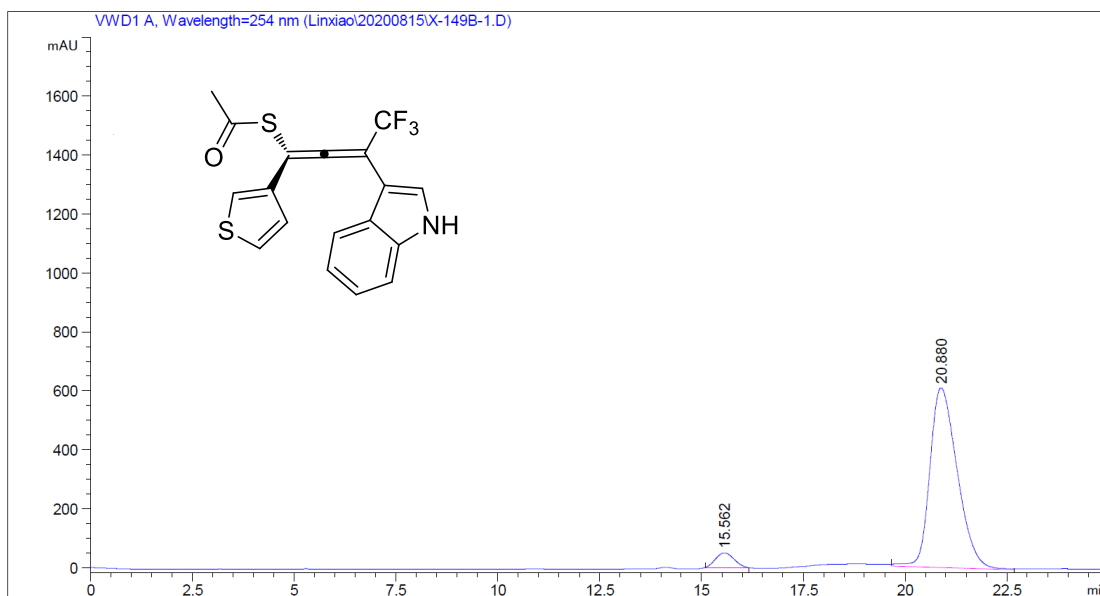

| # | Time   | Area    | Height | Width  | Symmetry | Area % |
|---|--------|---------|--------|--------|----------|--------|
| 1 | 15.562 | 1657.4  | 51.3   | 0.5382 | 0.897    | 5.470  |
| 2 | 20.88  | 28640.2 | 610.3  | 0.7822 | 0.673    | 94.530 |

**(S)-S-(1,1,1-trifluoro-2-(1H-indol-3-yl)hepta-2,3-dien-4-yl) ethanethioate (3ma)**

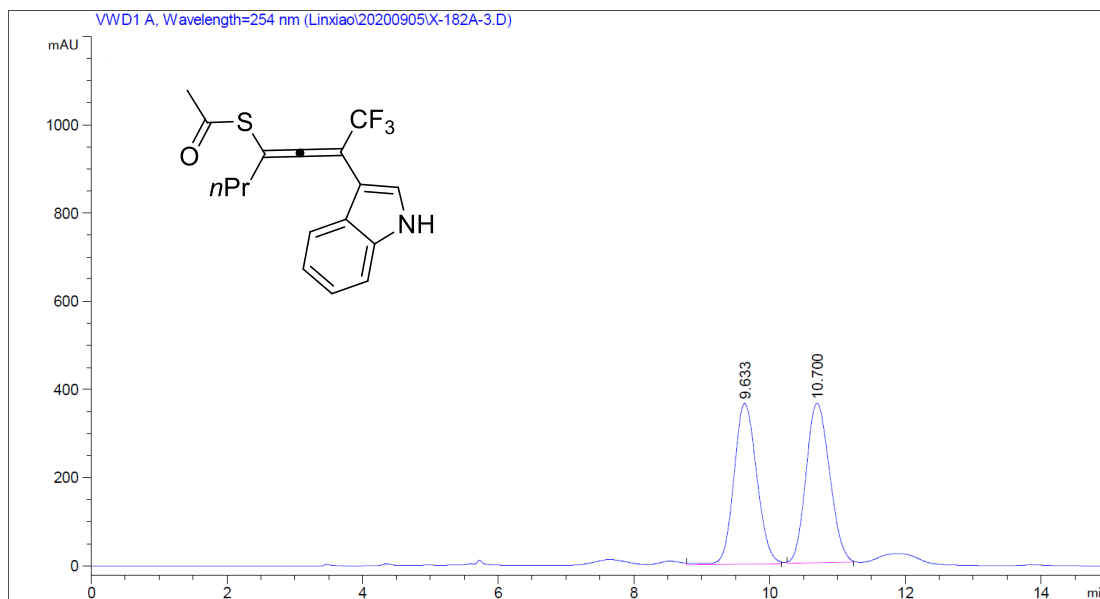

| # | Time  | Area   | Height | Width  | Symmetry | Area % |
|---|-------|--------|--------|--------|----------|--------|
| 1 | 9.633 | 8530.6 | 364.3  | 0.3903 | 0.864    | 49.401 |
| 2 | 10.7  | 8737.5 | 361.3  | 0.403  | 0.85     | 50.599 |

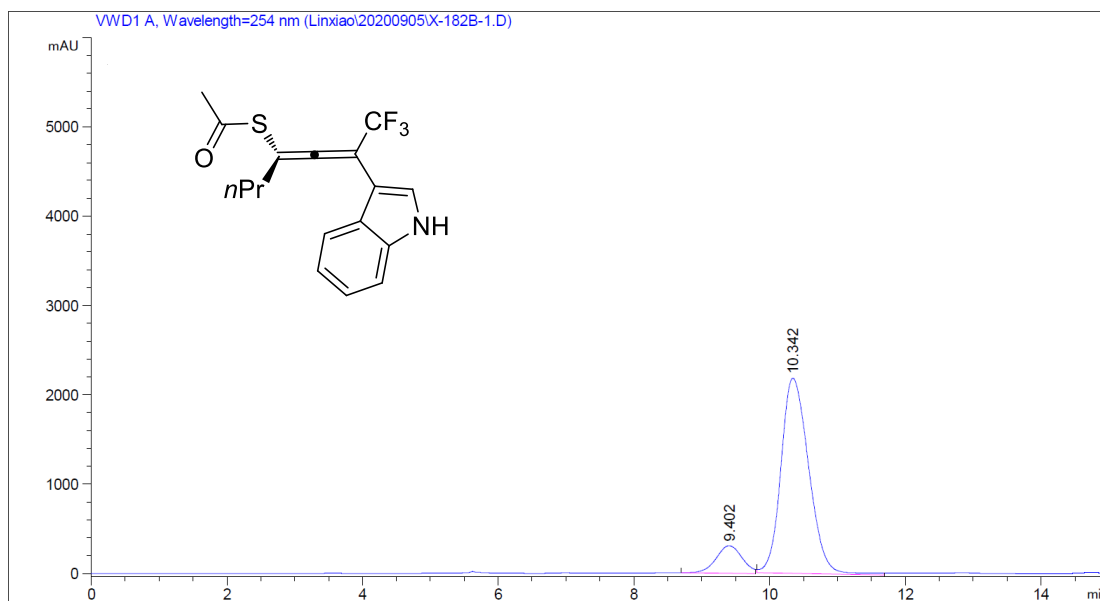

| # | Time   | Area    | Height | Width  | Symmetry | Area % |
|---|--------|---------|--------|--------|----------|--------|
| 1 | 9.402  | 8264    | 308.6  | 0.4463 | 0.996    | 11.705 |
| 2 | 10.342 | 62340.8 | 2188.3 | 0.4748 | 0.728    | 88.295 |

**(S)-S-(1,1,1-trifluoro-2-(1H-indol-3-yl)octa-2,3-dien-4-yl) ethanethioate (3na)**

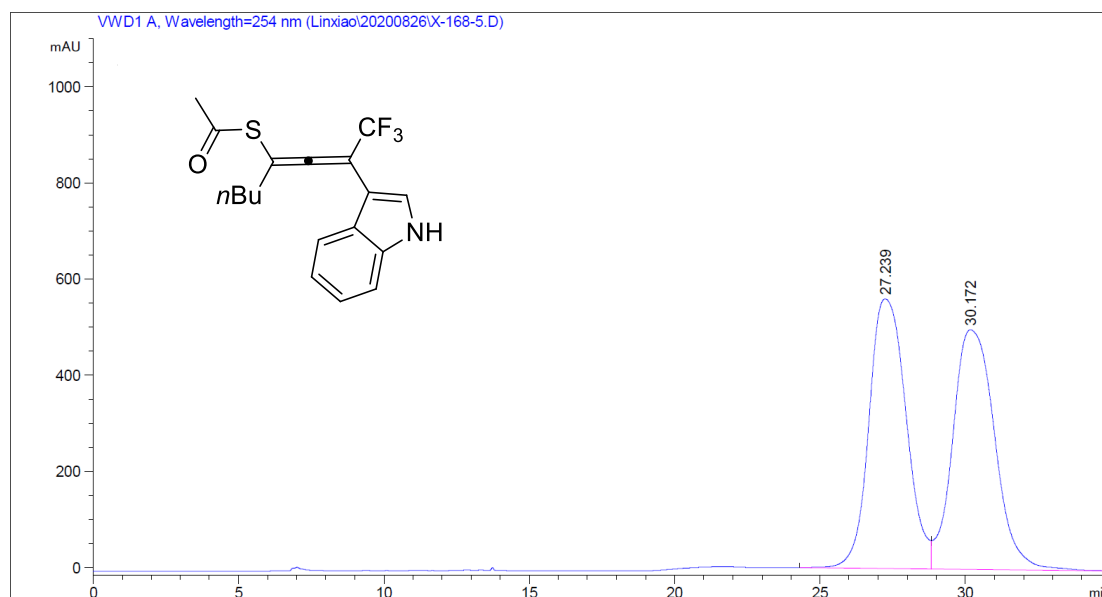

| # | Time   | Area    | Height | Width  | Symmetry | Area % |
|---|--------|---------|--------|--------|----------|--------|
| 1 | 27.239 | 49715.9 | 560.3  | 1.3872 | 0.767    | 49.909 |
| 2 | 30.172 | 49896.5 | 497.9  | 1.5841 | 0.722    | 50.091 |

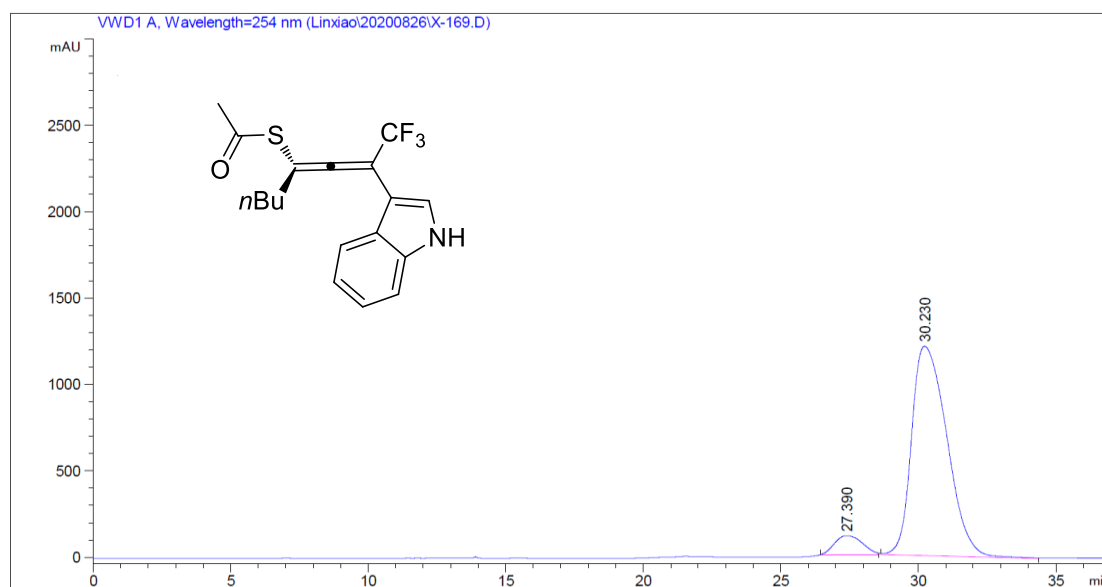

| # | Time  | Area     | Height | Width  | Symmetry | Area % |
|---|-------|----------|--------|--------|----------|--------|
| 1 | 27.39 | 7537.1   | 108    | 1.1632 | 0.747    | 6.512  |
| 2 | 30.23 | 108204.8 | 1211.2 | 1.4889 | 0.575    | 93.488 |

**(S)-S-(1-cyclopropyl-4,4,4-trifluoro-3-(1H-indol-3-yl)buta-1,2-dien-1-yl) ethanethioate (30a)**

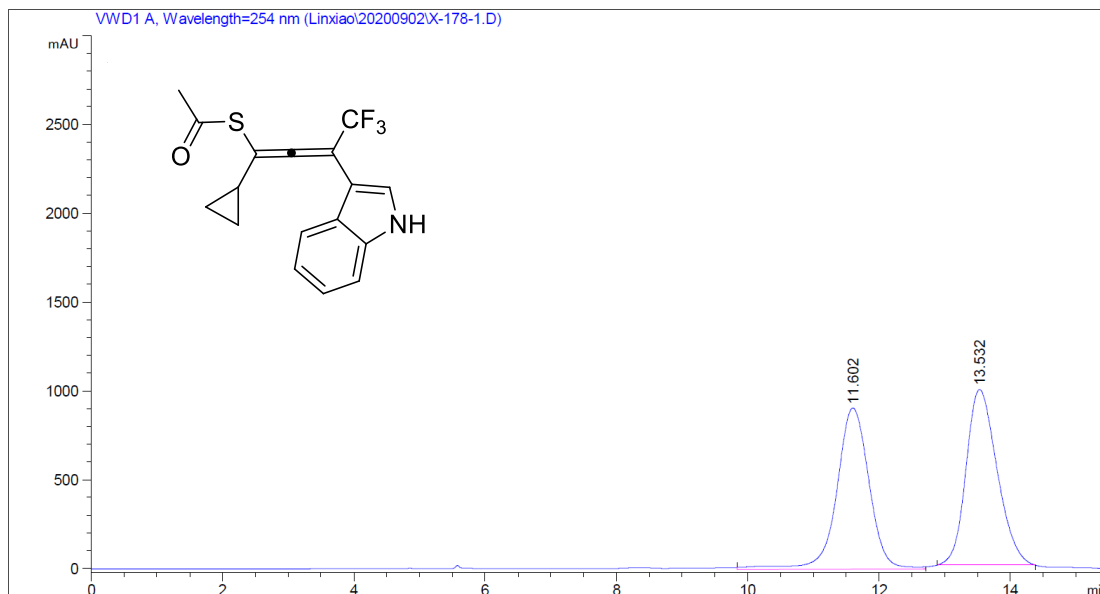

| # | Time   | Area    | Height | Width  | Symmetry | Area % |
|---|--------|---------|--------|--------|----------|--------|
| 1 | 11.602 | 31495.6 | 907.9  | 0.5782 | 1.004    | 49.432 |
| 2 | 13.532 | 32219.5 | 985.3  | 0.545  | 0.748    | 50.568 |

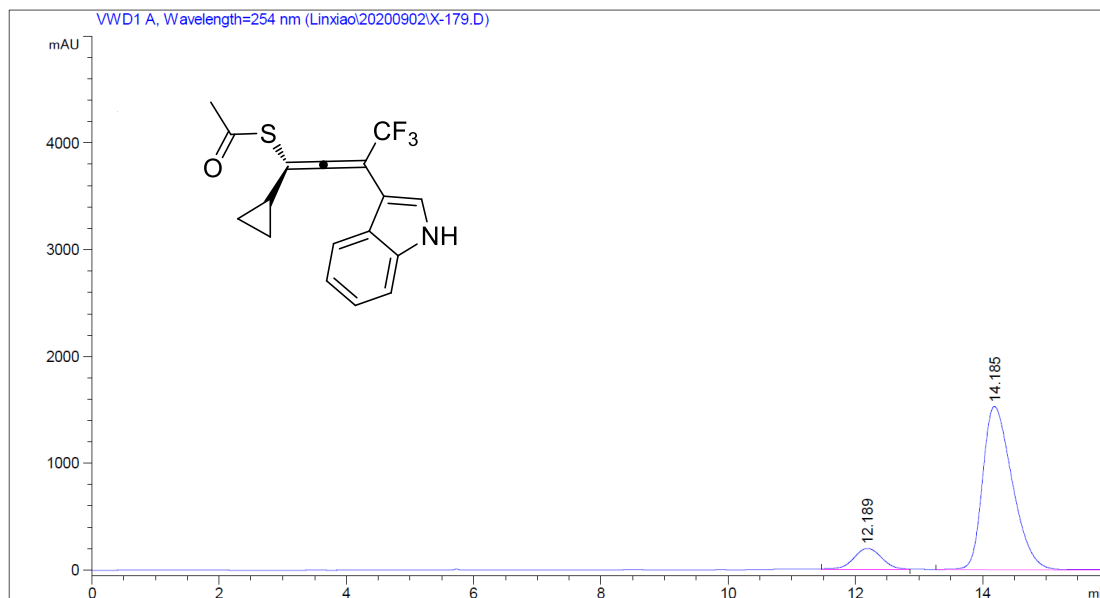

| # | Time   | Area    | Height | Width  | Symmetry | Area % |
|---|--------|---------|--------|--------|----------|--------|
| 1 | 12.189 | 5642.3  | 191.3  | 0.4915 | 0.949    | 10.156 |
| 2 | 14.185 | 49916.6 | 1530.4 | 0.5255 | 0        | 89.844 |



**(S)-S-(4,4,4-trifluoro-3-(5-fluoro-1H-indol-3-yl)-1-phenylbuta-1,2-dien-1-yl) ethanethioate (3pa)**

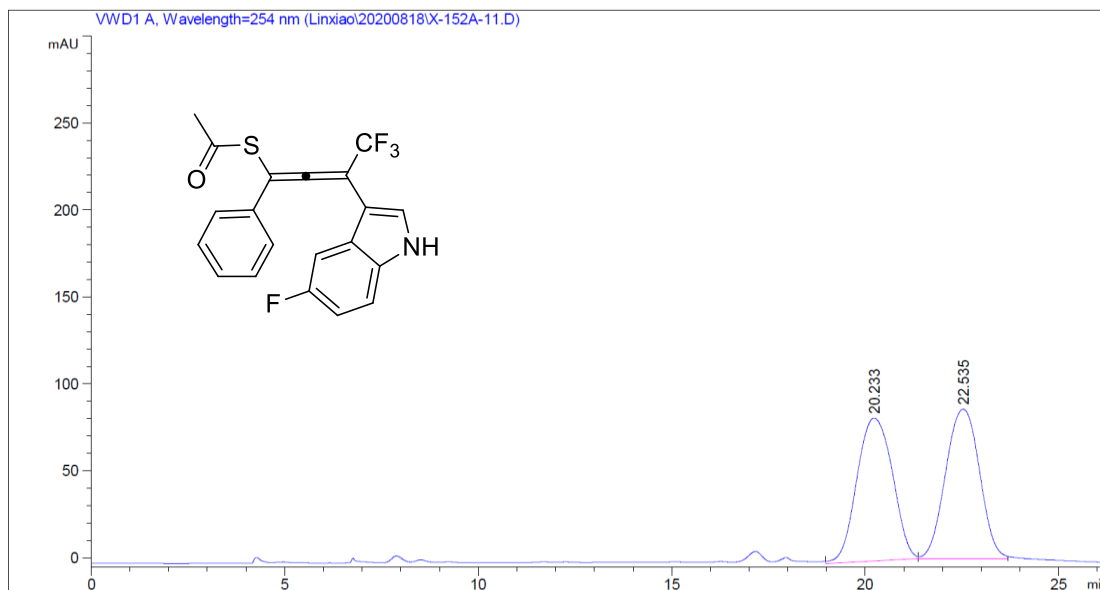

| # | Time   | Area   | Height | Width  | Symmetry | Area % |
|---|--------|--------|--------|--------|----------|--------|
| 1 | 20.233 | 5271.3 | 82.2   | 1.0683 | 0.924    | 50.114 |
| 2 | 22.535 | 5247.4 | 86     | 1.0169 | 1.04     | 49.886 |

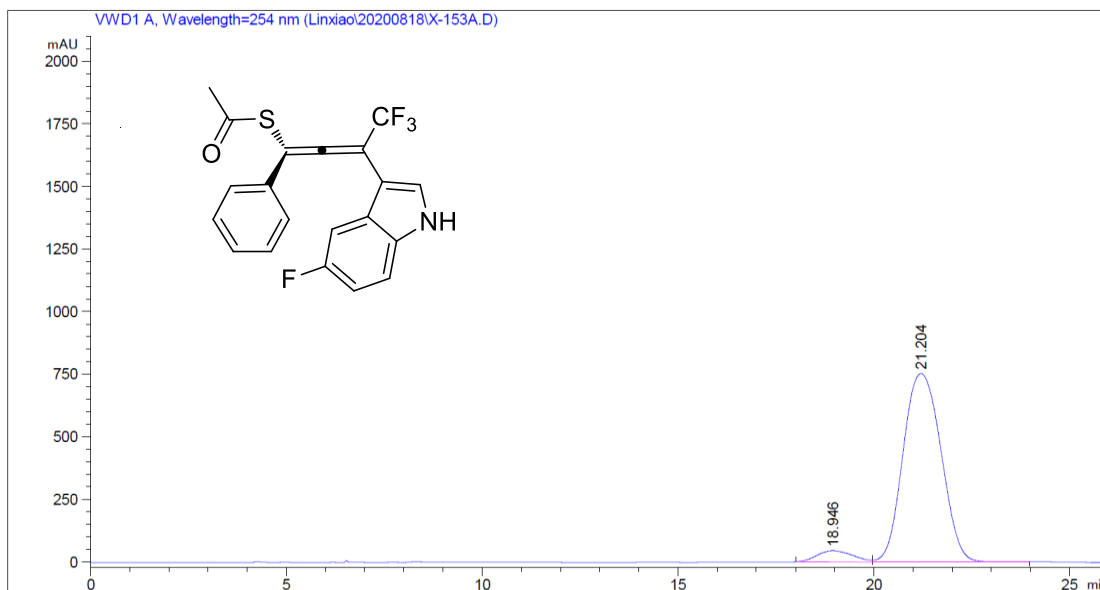

| # | Time   | Area    | Height | Width  | Symmetry | Area % |
|---|--------|---------|--------|--------|----------|--------|
| 1 | 18.946 | 2733.4  | 43.8   | 1.04   | 0.75     | 5.106  |
| 2 | 21.204 | 50803.6 | 753.5  | 1.0389 | 0        | 94.894 |

**(S)-S-(3-(5-chloro-1H-indol-3-yl)-4,4,4-trifluoro-1-phenylbuta-1,2-dien-1-yl) ethanethioate (3qa)**

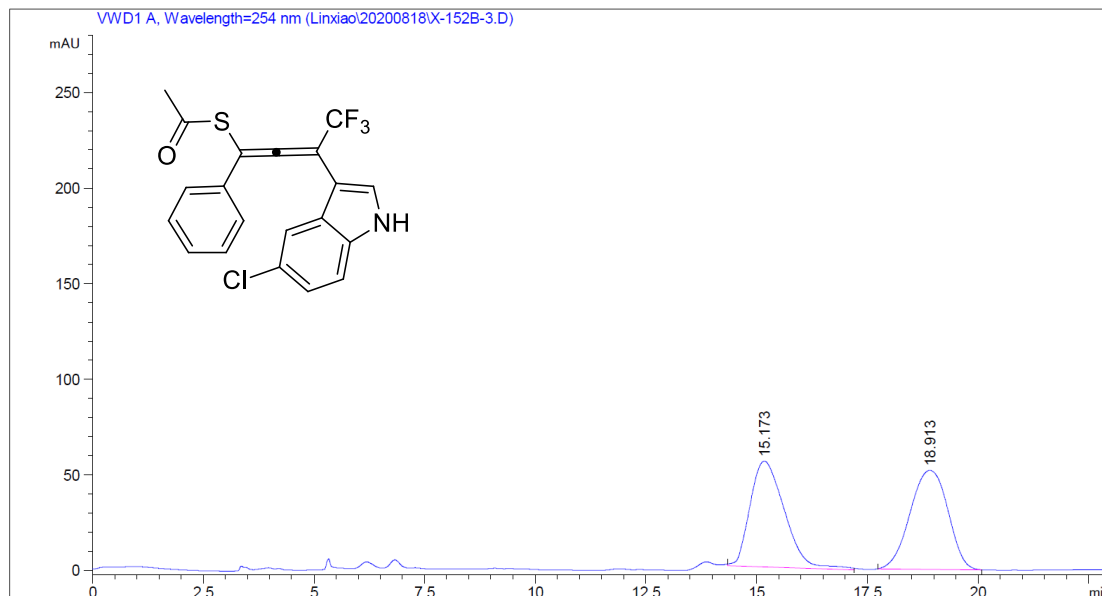

| # | Time   | Area   | Height | Width  | Symmetry | Area % |
|---|--------|--------|--------|--------|----------|--------|
| 1 | 15.173 | 3006.2 | 55.5   | 0.8815 | 0        | 49.458 |
| 2 | 18.913 | 3072.1 | 51.8   | 0.9886 | 1.066    | 50.542 |

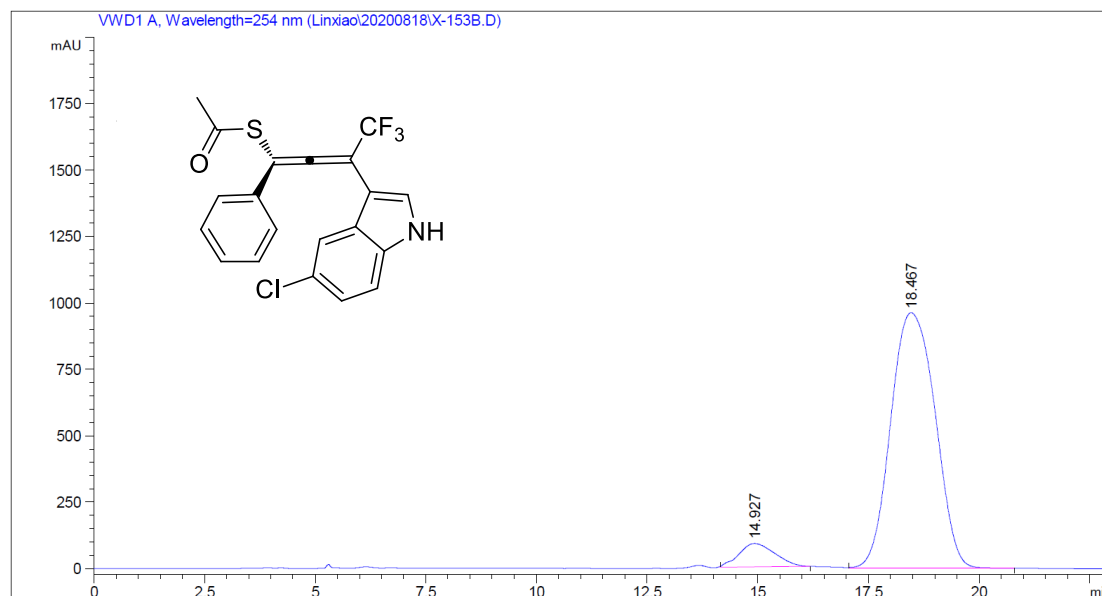

| # | Time   | Area    | Height | Width  | Symmetry | Area % |
|---|--------|---------|--------|--------|----------|--------|
| 1 | 14.927 | 5029.6  | 89.1   | 0.9412 | 0.755    | 6.986  |
| 2 | 18.467 | 66967.9 | 961.3  | 1.0643 | 0        | 93.014 |

**(S)-S-(3-(5-bromo-1H-indol-3-yl)-4,4,4-trifluoro-1-phenylbuta-1,2-dien-1-yl) ethanethioate (3ra)**

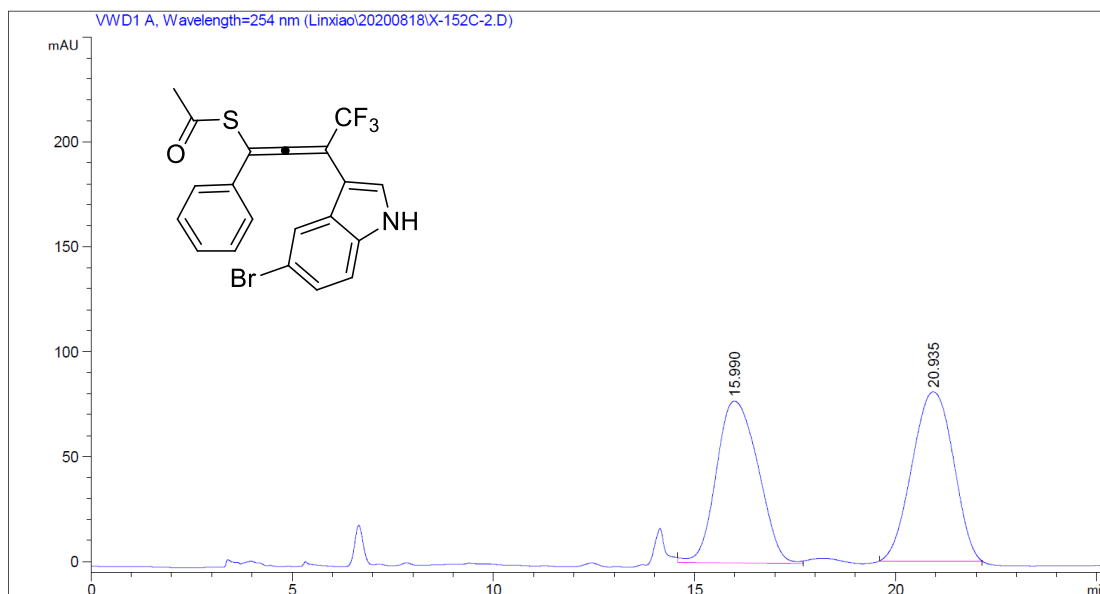

| # | Time   | Area   | Height | Width  | Symmetry | Area % |
|---|--------|--------|--------|--------|----------|--------|
| 1 | 15.99  | 5572.2 | 77.1   | 1.2051 | 0.758    | 49.242 |
| 2 | 20.935 | 5743.7 | 80.6   | 1.1882 | 1.034    | 50.758 |

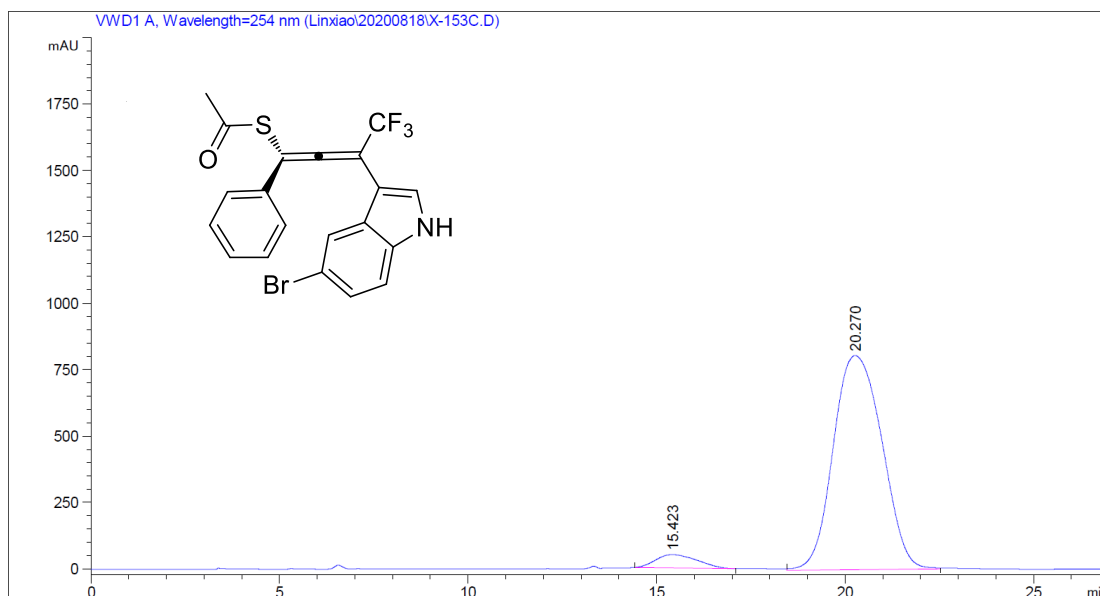

| # | Time   | Area    | Height | Width  | Symmetry | Area % |
|---|--------|---------|--------|--------|----------|--------|
| 1 | 15.423 | 3797.4  | 49.9   | 1.1331 | 0.657    | 4.984  |
| 2 | 20.27  | 72396.5 | 805.9  | 1.4876 | 0        | 95.016 |

**(S)-S-(4,4,4-trifluoro-3-(5-methyl-1H-indol-3-yl)-1-phenylbuta-1,2-dien-1-yl) ethanethioate (3sa)**

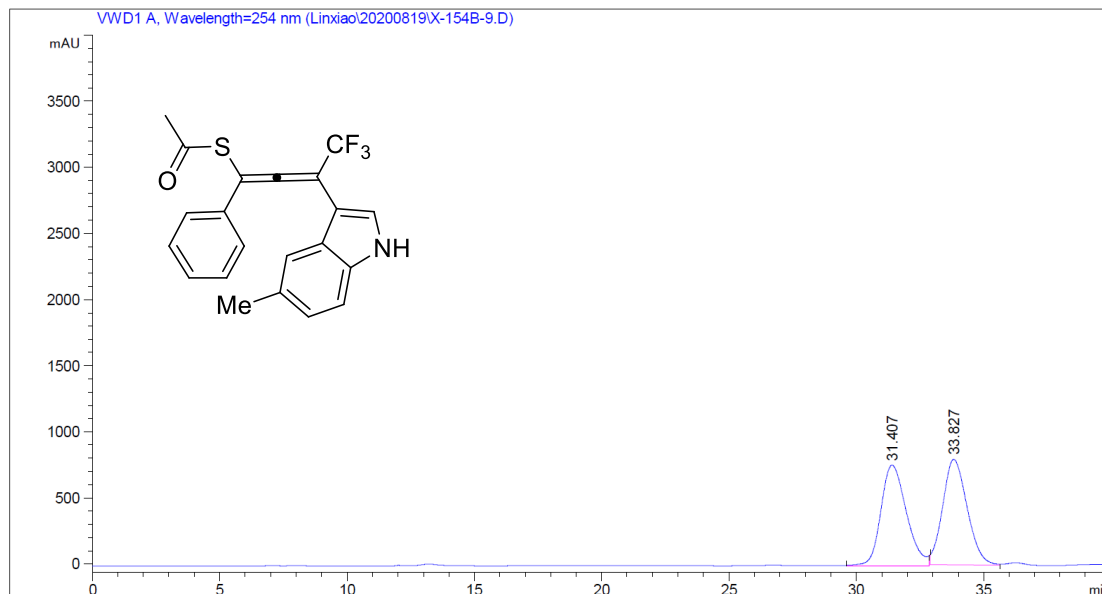

| # | Time   | Area    | Height | Width  | Symmetry | Area % |
|---|--------|---------|--------|--------|----------|--------|
| 1 | 31.407 | 52993.9 | 760.5  | 1.1614 | 0.761    | 49.844 |
| 2 | 33.827 | 53325   | 798.3  | 1.1133 | 0.792    | 50.156 |

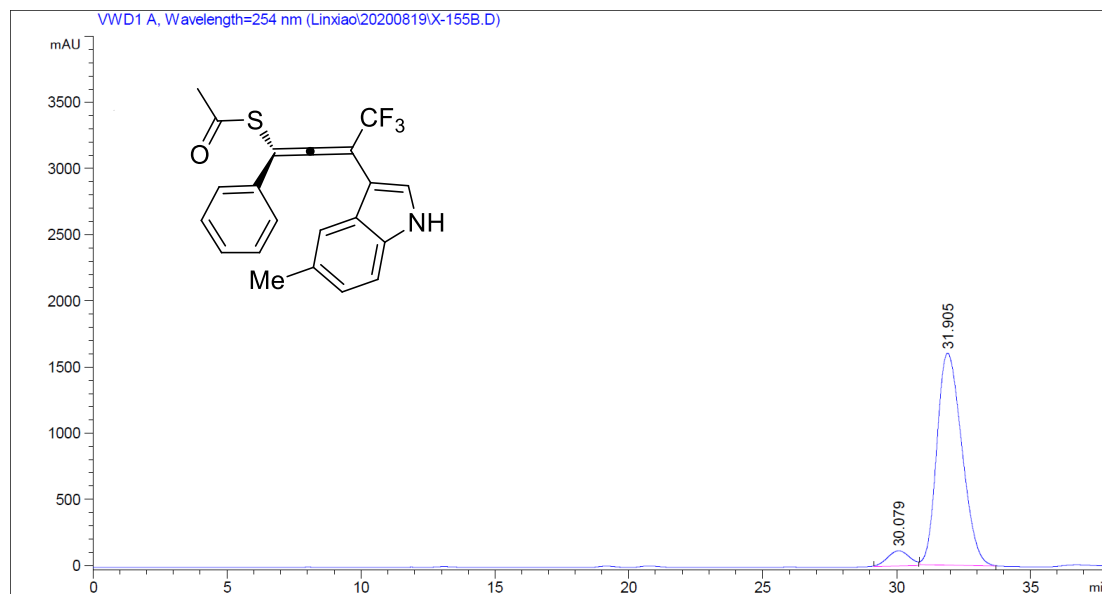

| # | Time   | Area   | Height | Width  | Symmetry | Area % |
|---|--------|--------|--------|--------|----------|--------|
| 1 | 30.079 | 6353.8 | 113.2  | 0.9351 | 1.023    | 5.765  |
| 2 | 31.905 | 103854 | 1602.6 | 1.0801 | 0.728    | 94.235 |

**(S)-S-(4,4,4-trifluoro-3-(6-fluoro-1H-indol-3-yl)-1-phenylbuta-1,2-dien-1-yl) ethanethioate (3ta)**

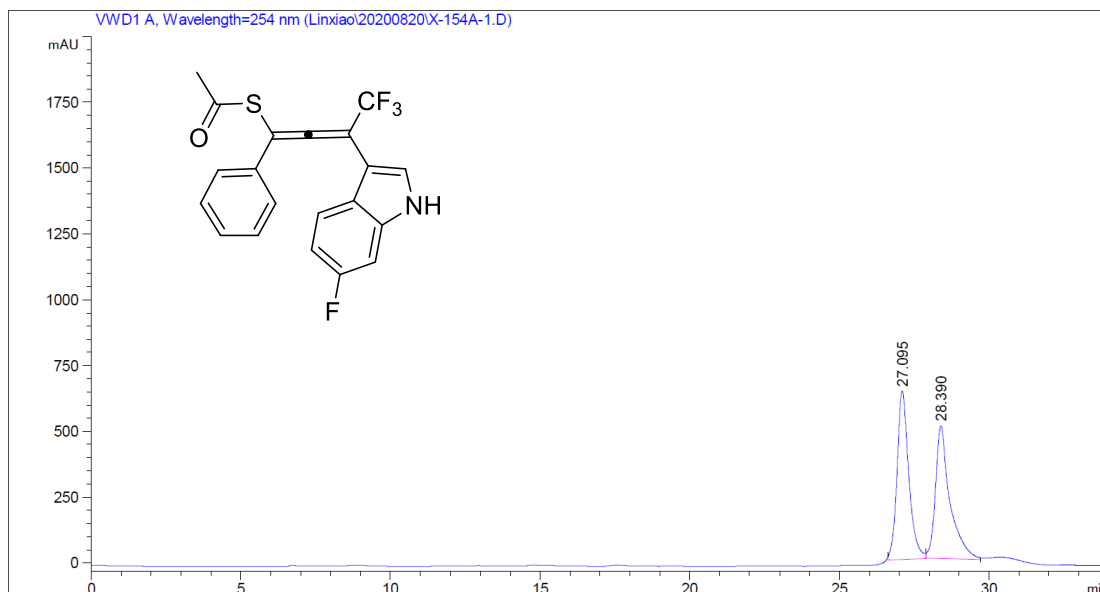

| # | Time   | Area    | Height | Width  | Symmetry | Area % |
|---|--------|---------|--------|--------|----------|--------|
| 1 | 27.095 | 17405.1 | 641    | 0.4526 | 0.747    | 50.730 |
| 2 | 28.39  | 16904   | 504.8  | 0.5581 | 0.586    | 49.270 |

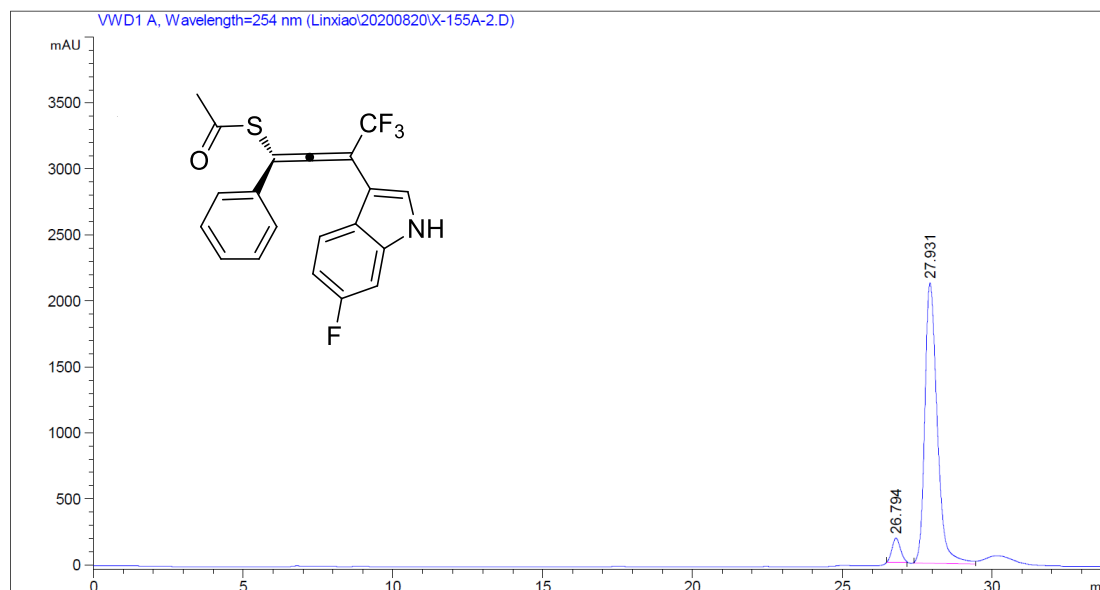

| # | Time   | Area  | Height | Width  | Symmetry | Area % |
|---|--------|-------|--------|--------|----------|--------|
| 1 | 26.794 | 3569  | 184    | 0.3234 | 0.869    | 5.514  |
| 2 | 27.931 | 61153 | 2125.5 | 0.4214 | 0        | 94.486 |

**(S)-S-(4,4,4-trifluoro-3-(6-methyl-1H-indol-3-yl)-1-phenylbuta-1,2-dien-1-yl) ethanethioate (3ua)**

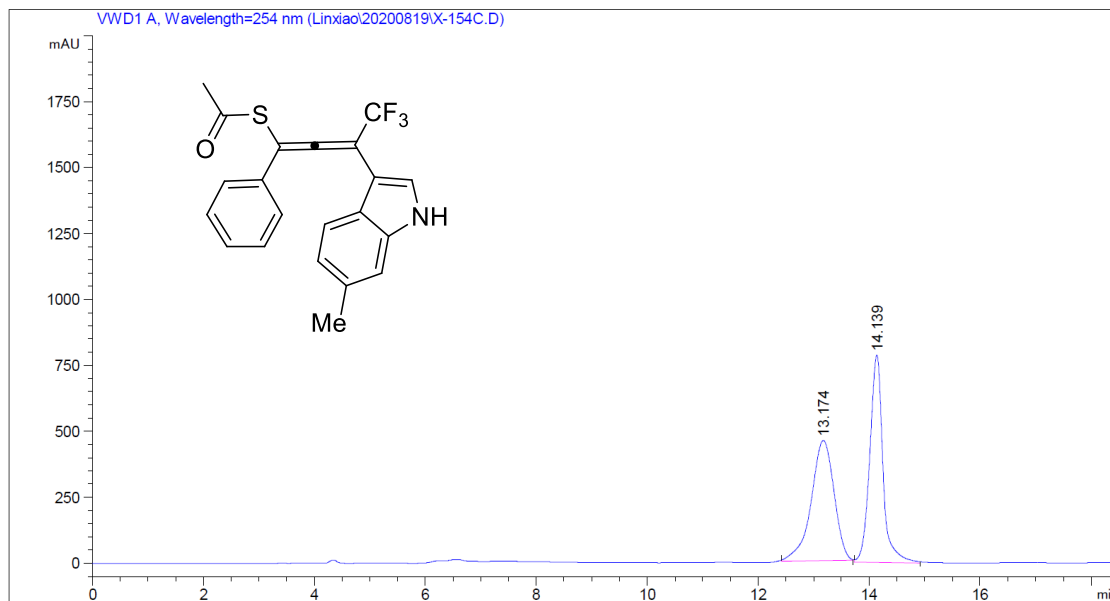

| # | Time   | Area    | Height | Width  | Symmetry | Area % |
|---|--------|---------|--------|--------|----------|--------|
| 1 | 13.174 | 13076.9 | 456    | 0.4779 | 1.113    | 50.206 |
| 2 | 14.139 | 12969.4 | 785.8  | 0.2751 | 1.077    | 49.794 |

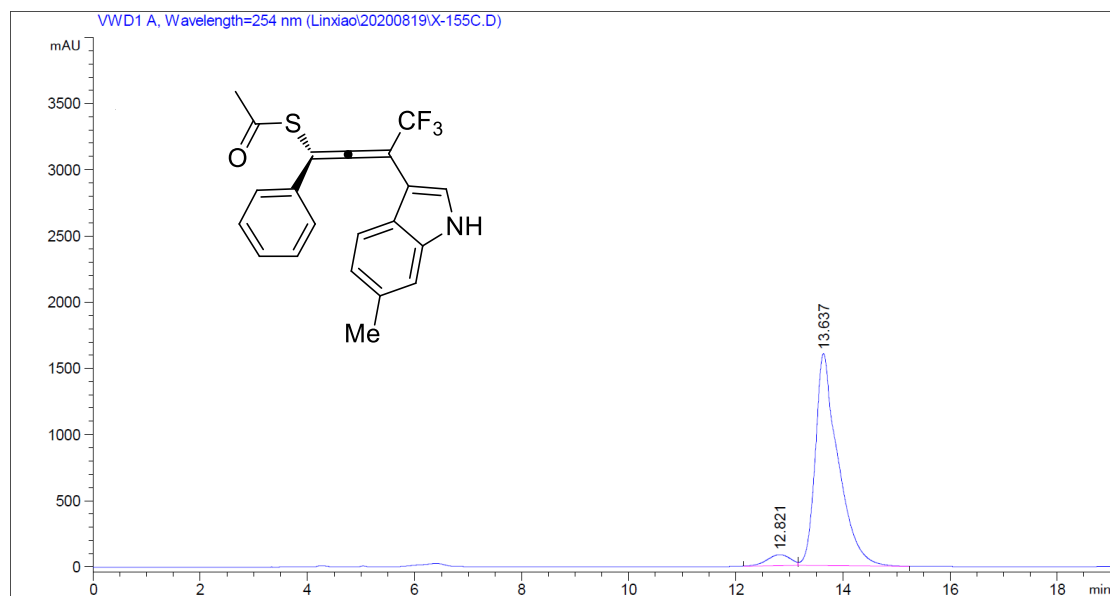

| # | Time   | Area    | Height | Width  | Symmetry | Area % |
|---|--------|---------|--------|--------|----------|--------|
| 1 | 12.821 | 2538.2  | 84.1   | 0.5028 | 1.2      | 5.081  |
| 2 | 13.637 | 47412.3 | 1602.8 | 0.493  | 0.541    | 94.919 |

**(S)-S-(4,4,4-trifluoro-3-(7-methyl-1H-indol-3-yl)-1-phenylbuta-1,2-dien-1-yl) ethanethioate (3va)**

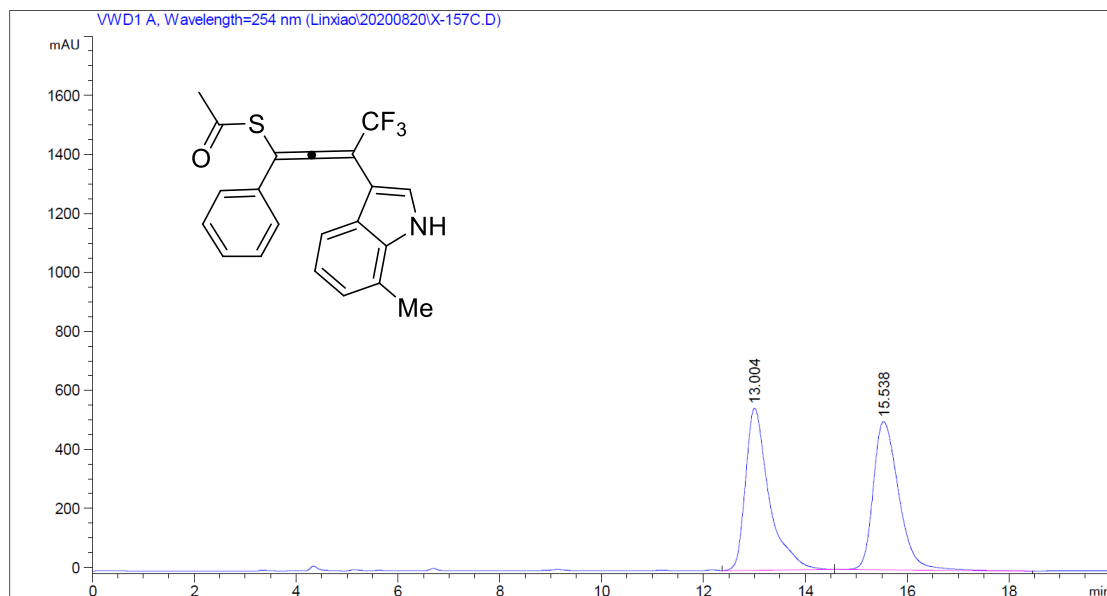

| # | Time   | Area    | Height | Width  | Symmetry | Area % |
|---|--------|---------|--------|--------|----------|--------|
| 1 | 13.004 | 17670.2 | 549.5  | 0.4722 | 0.575    | 50.341 |
| 2 | 15.538 | 17430.8 | 502.3  | 0.5398 | 0.641    | 49.659 |

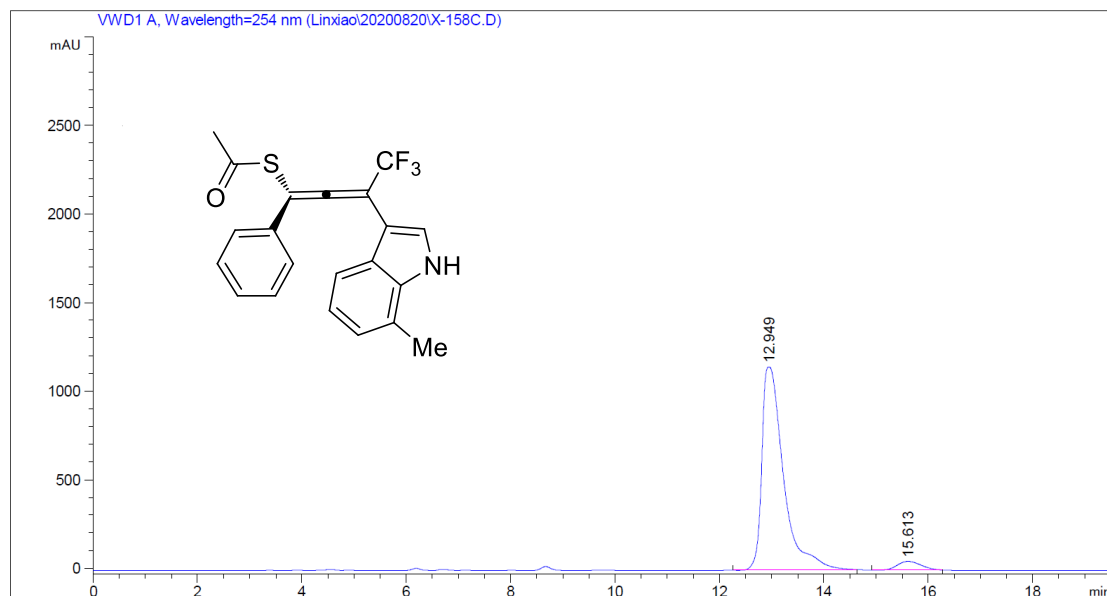

| # | Time   | Area   | Height | Width  | Symmetry | Area % |
|---|--------|--------|--------|--------|----------|--------|
| 1 | 12.949 | 33117  | 1147.3 | 0.4811 | 0.465    | 95.623 |
| 2 | 15.613 | 1515.9 | 48.6   | 0.5197 | 0.784    | 4.377  |

**(S)-S-(4,4,4-trifluoro-3-(1H-indol-3-yl)-1-phenylbuta-1,2-dien-1-yl) benzothioate (3ab)**

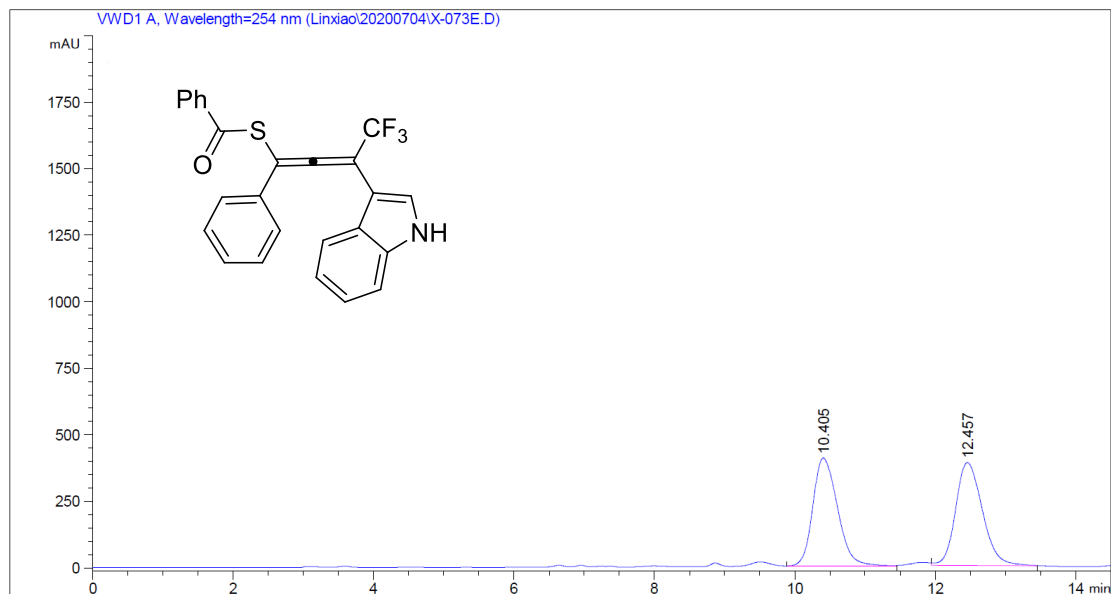

| # | Time   | Area    | Height | Width  | Symmetry | Area % |
|---|--------|---------|--------|--------|----------|--------|
| 1 | 10.405 | 9933.8  | 406    | 0.4078 | 0.714    | 49.230 |
| 2 | 12.457 | 10244.5 | 386.8  | 0.4414 | 0.763    | 50.770 |

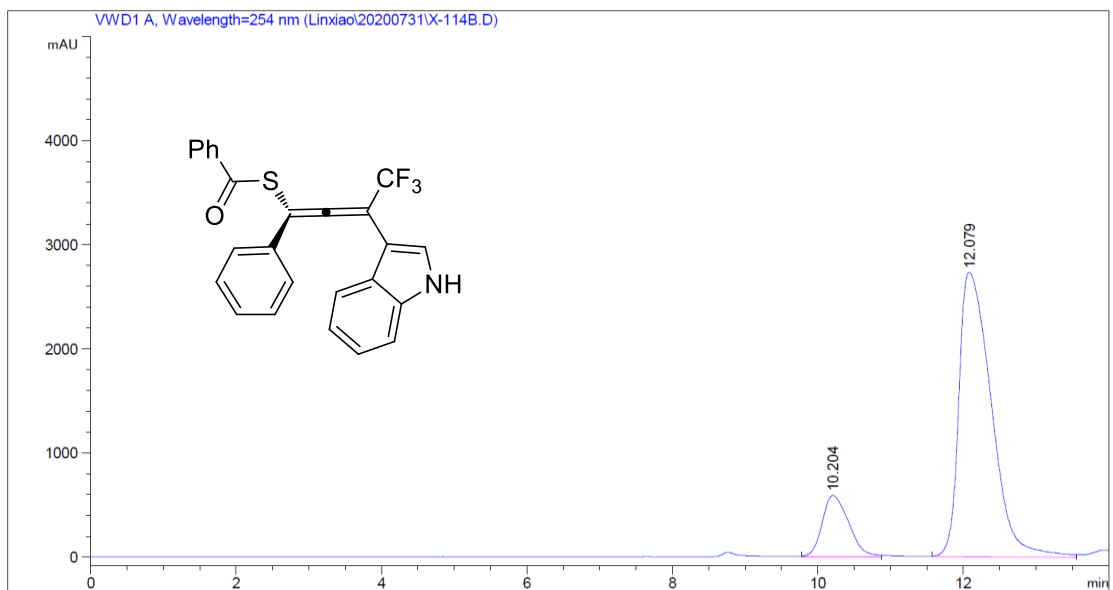

| # | Time   | Area    | Height | Width  | Symmetry | Area % |
|---|--------|---------|--------|--------|----------|--------|
| 1 | 10.204 | 15071.9 | 589.2  | 0.4145 | 0.641    | 14.973 |
| 2 | 12.079 | 85589.8 | 2730.1 | 0.4955 | 0.444    | 85.027 |



## J: NMR Analysis

### (*S,S*)-(4,4,4-trifluoro-3-(1*H*-indol-3-yl)-1-phenylbuta-1,2-dien-1-yl) ethanethioate (3aa)

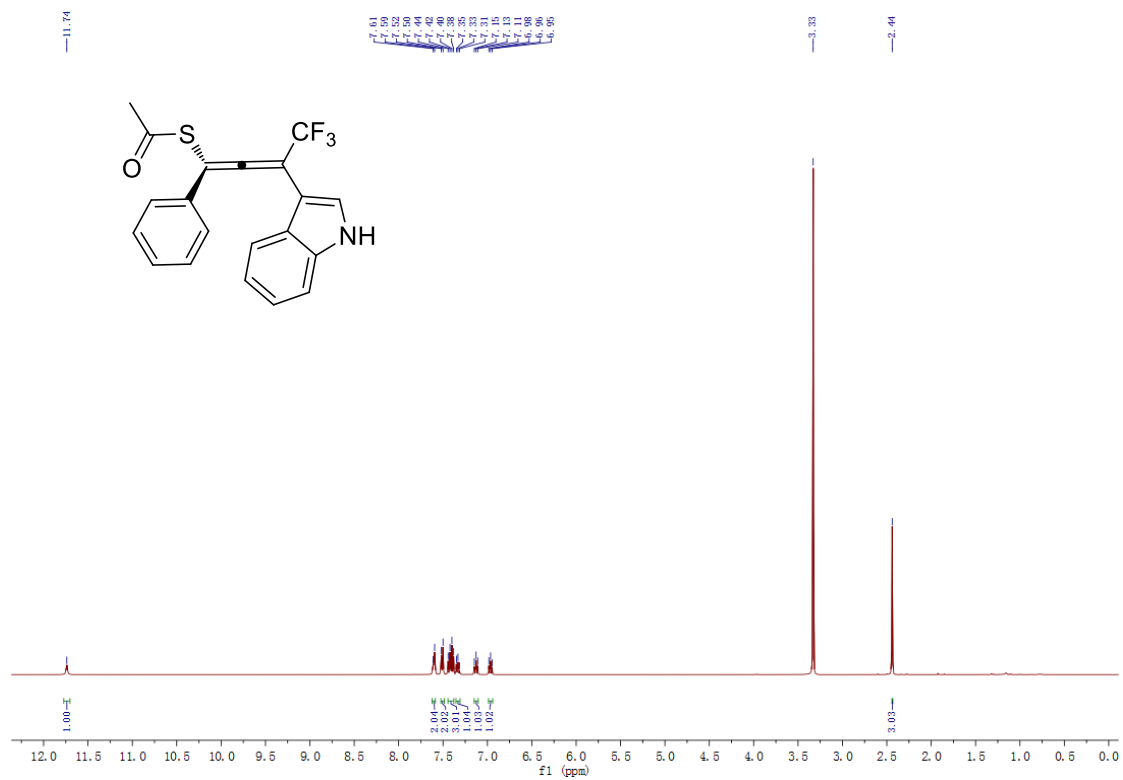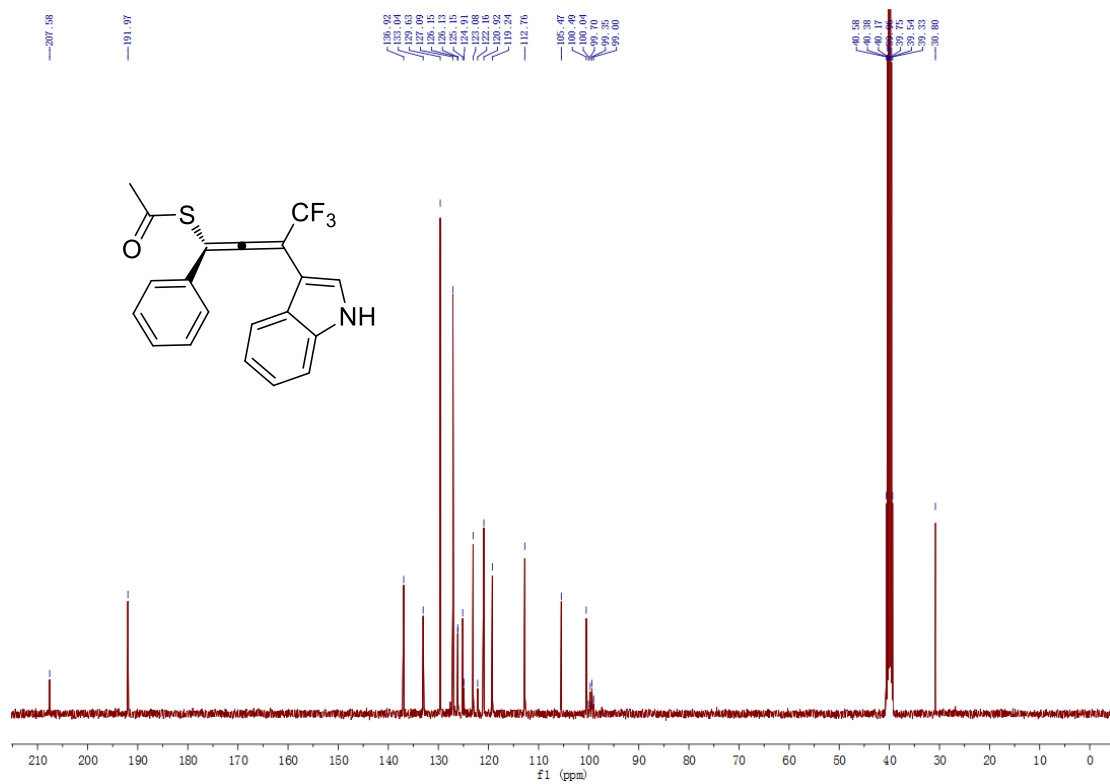

**(S)-S-(1-(4-chlorophenyl)-4,4,4-trifluoro-3-(1H-indol-3-yl)buta-1,2-dien-1-yl) ethanethioate (3ba)**

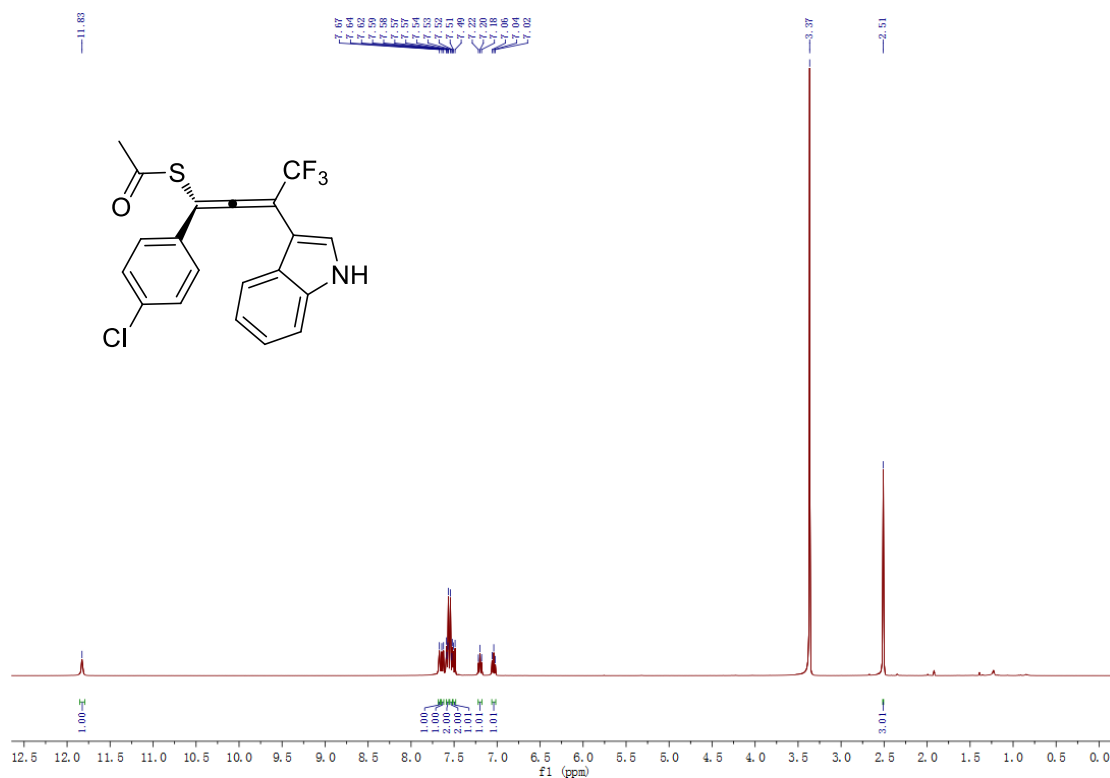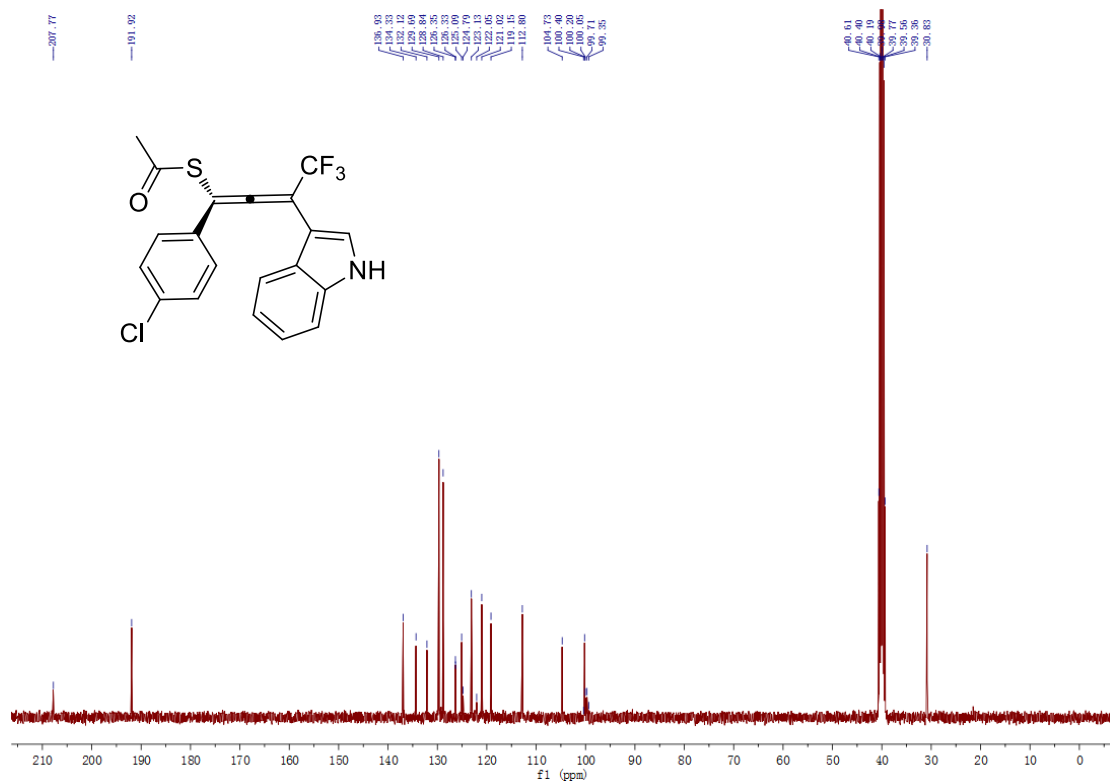

**(S)-S-(1-(4-bromophenyl)-4,4,4-trifluoro-3-(1H-indol-3-yl)buta-1,2-dien-1-yl) ethanethioate (3ca)**

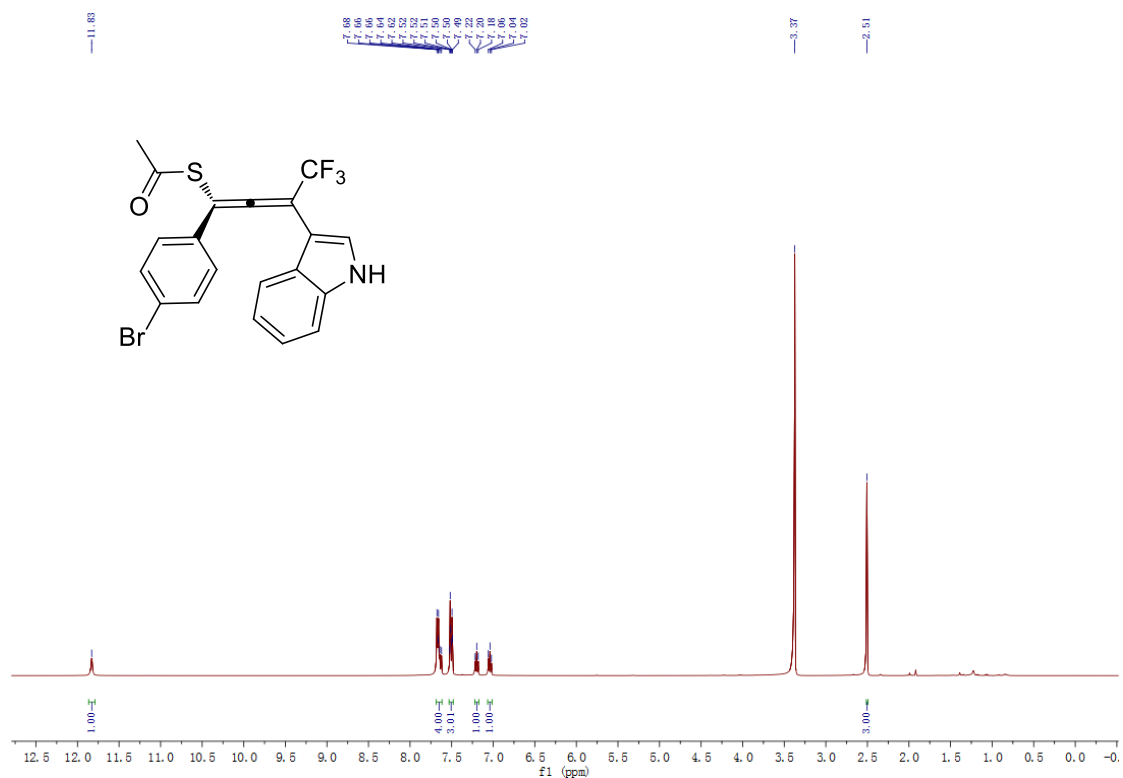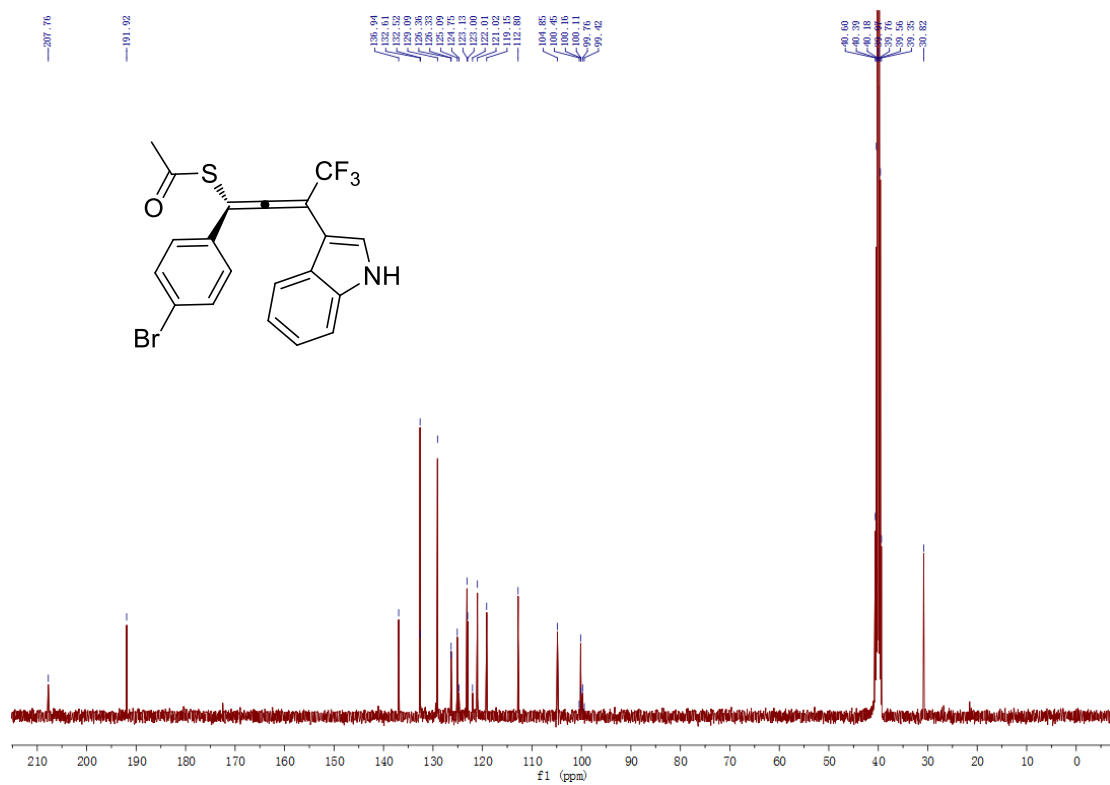

**(S)-S-(4,4,4-trifluoro-3-(1H-indol-3-yl)-1-(p-tolyl)buta-1,2-dien-1-yl)ethanethioate (3da)**

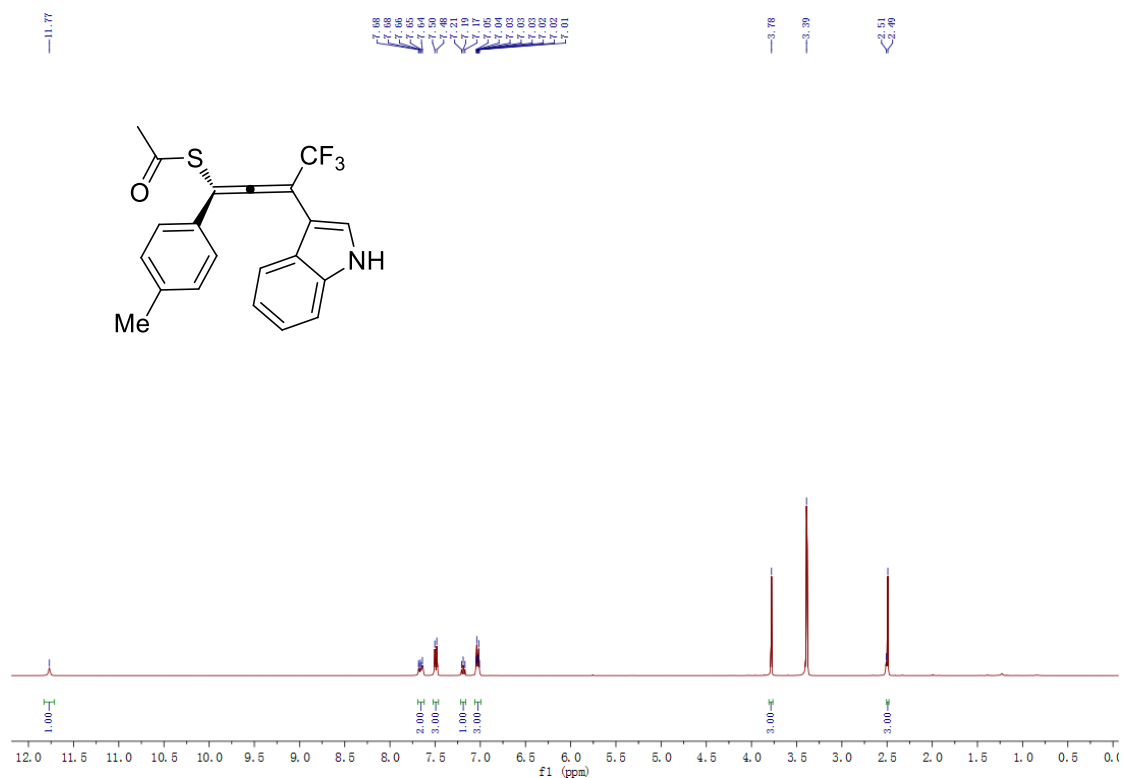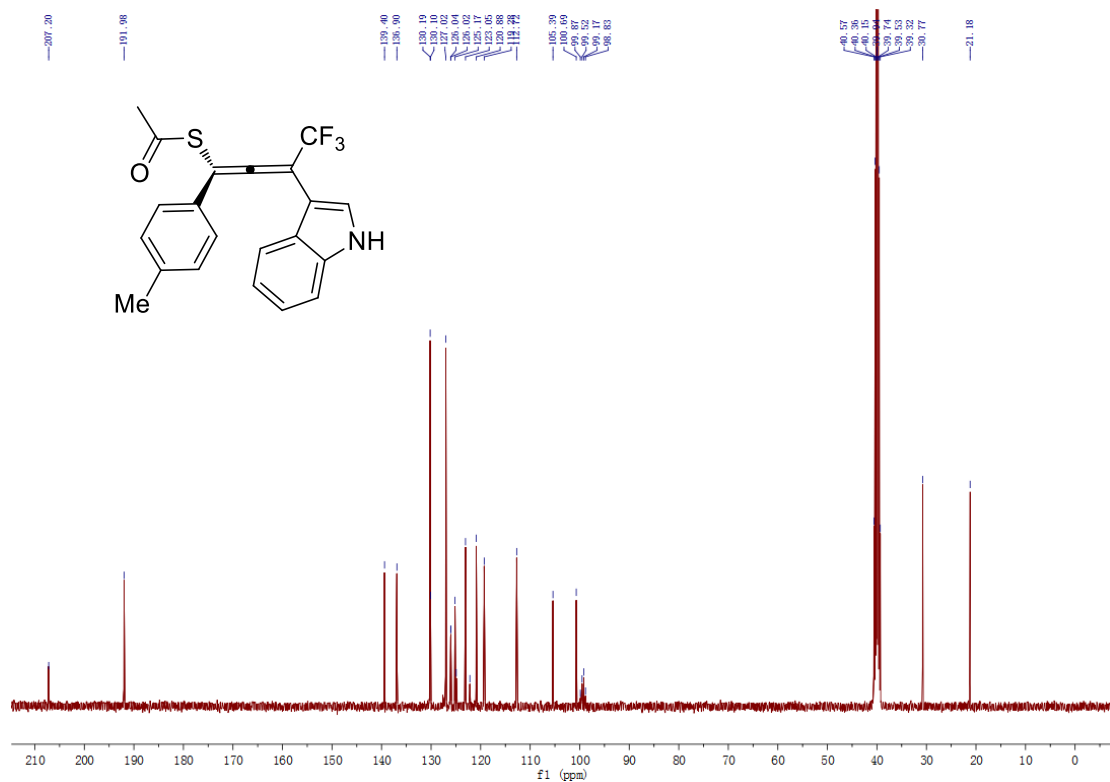

**(S)-S-(4,4,4-trifluoro-3-(1H-indol-3-yl)-1-(4-methoxyphenyl)buta-1,2-dien-1-yl) ethanethioate (3ea)**

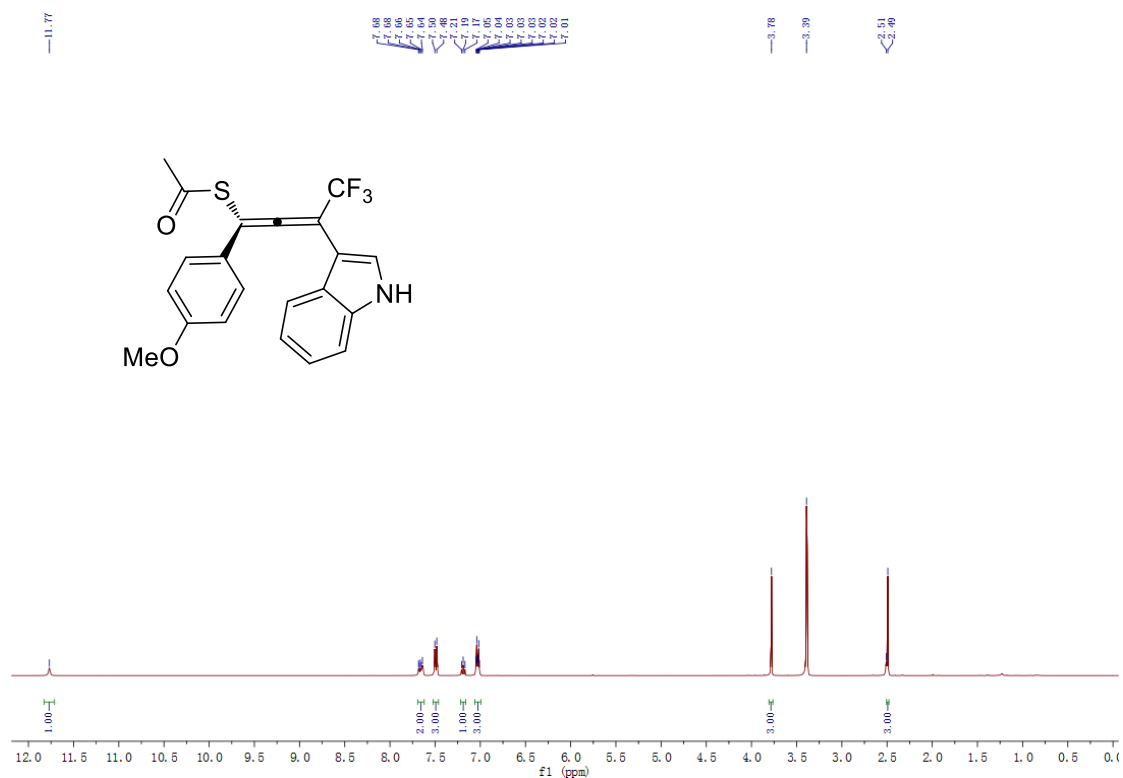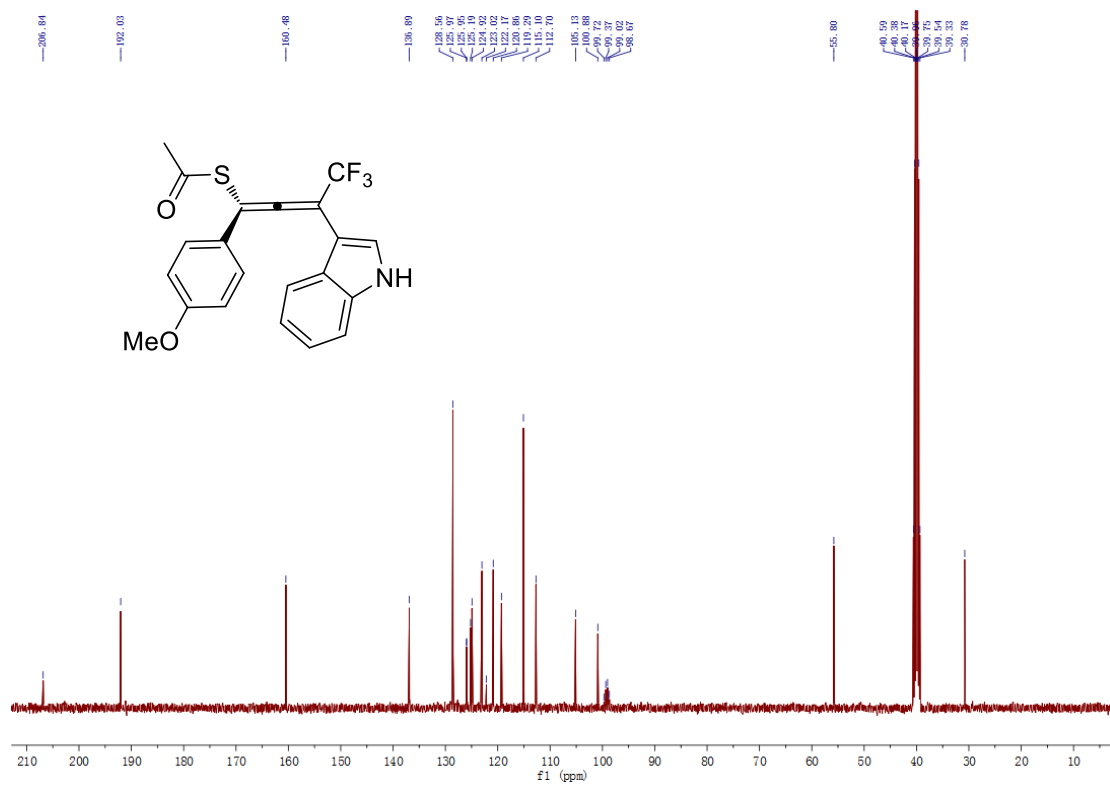

**(S)-S-(4,4,4-trifluoro-1-(3-fluorophenyl)-3-(1H-indol-3-yl)buta-1,2-dien-1-yl)ethanethioate (3fa)**

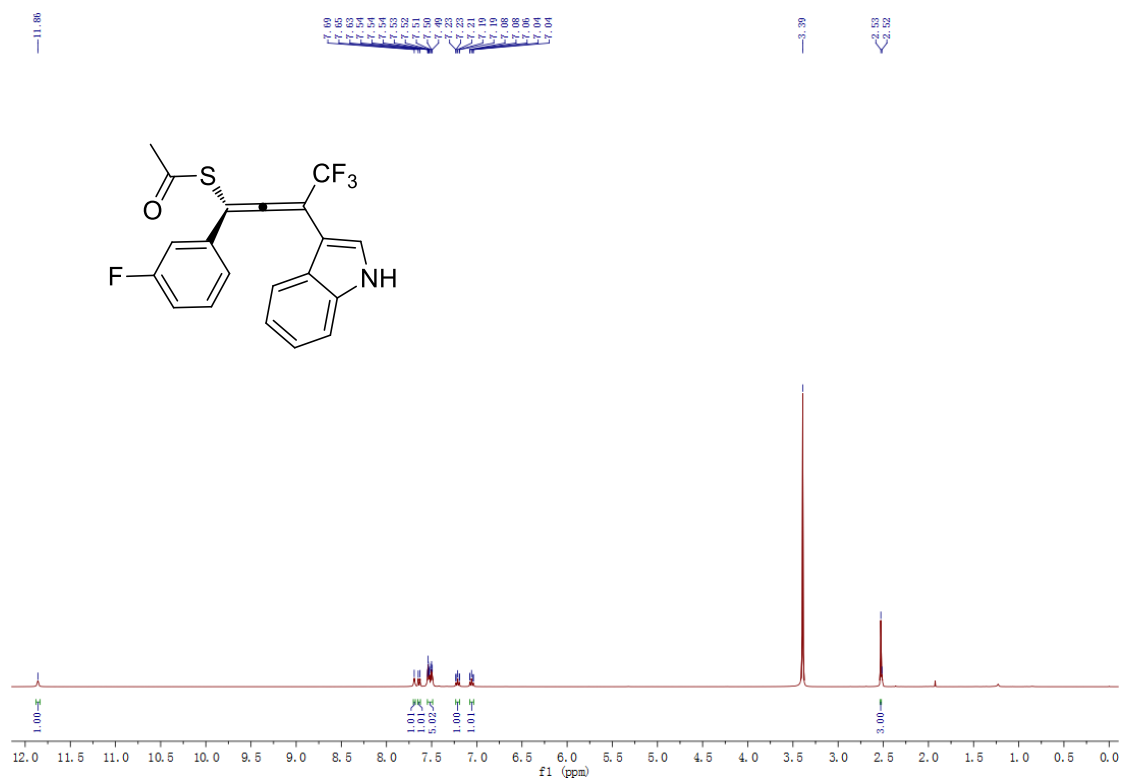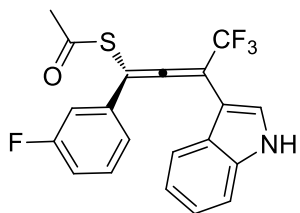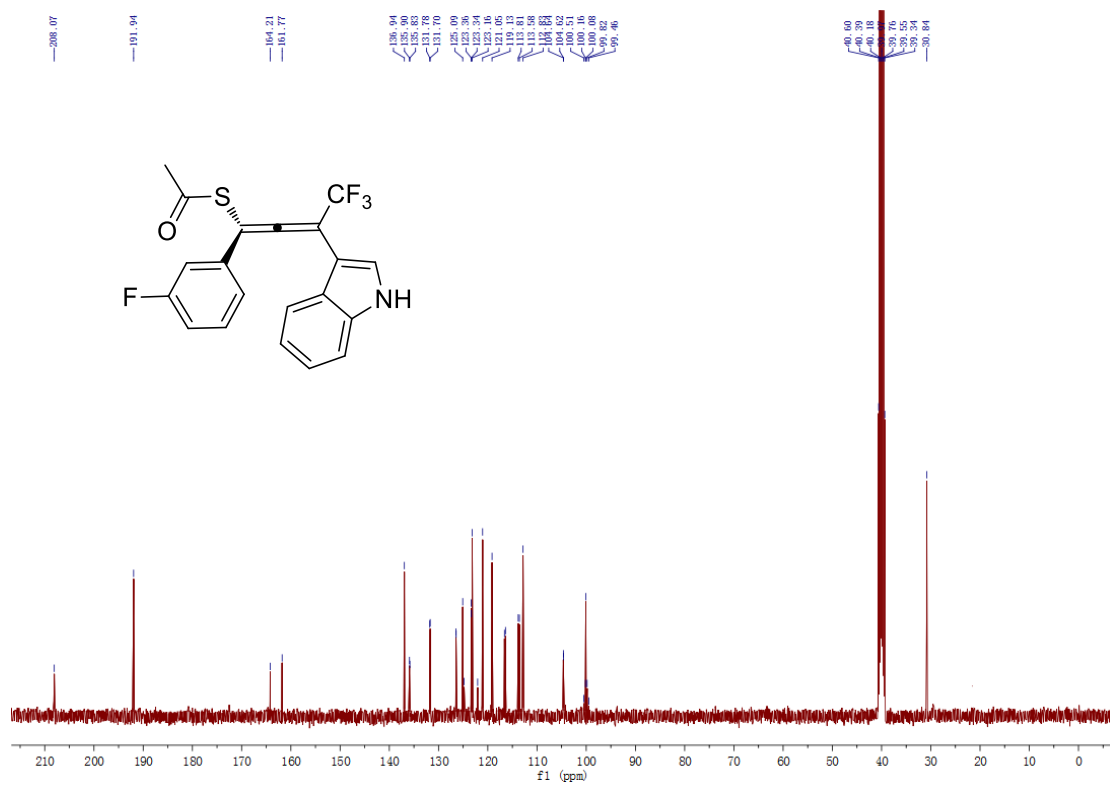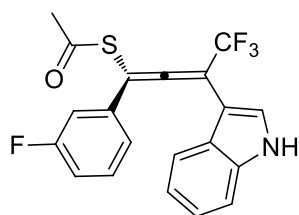

**(S)-S-(1-(3-chlorophenyl)-4,4,4-trifluoro-3-(1H-indol-3-yl)buta-1,2-dien-1-yl)ethanethioate (3ga)**

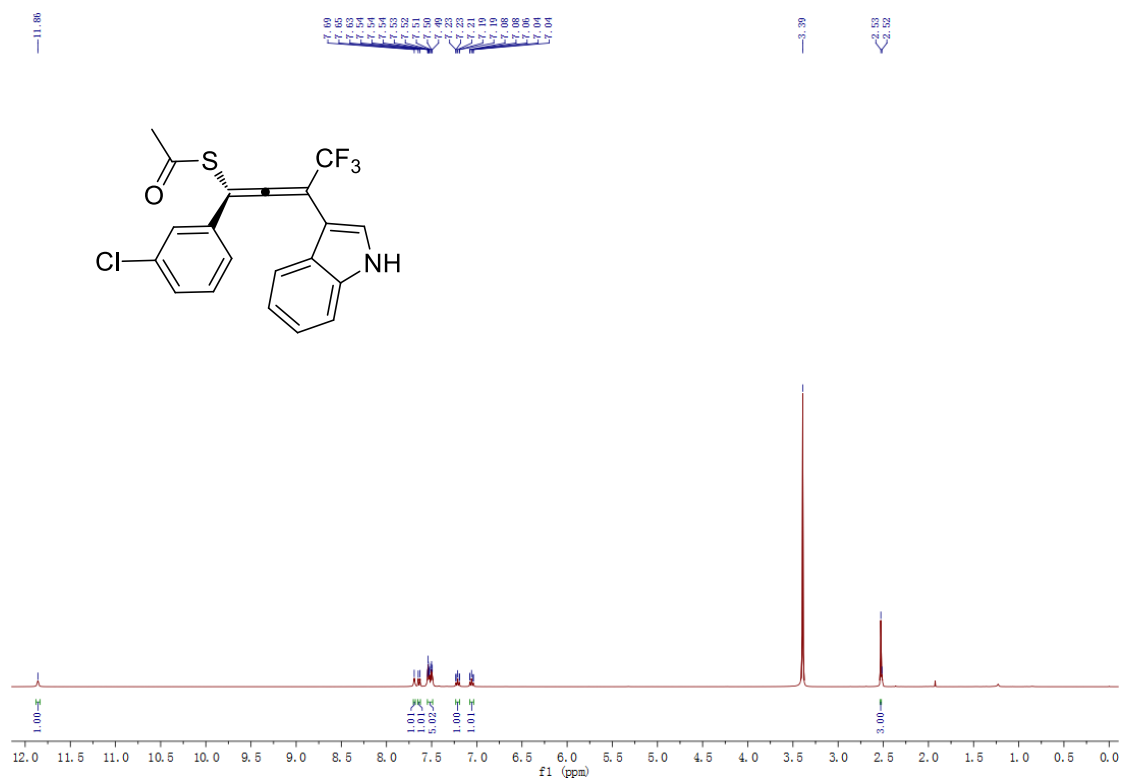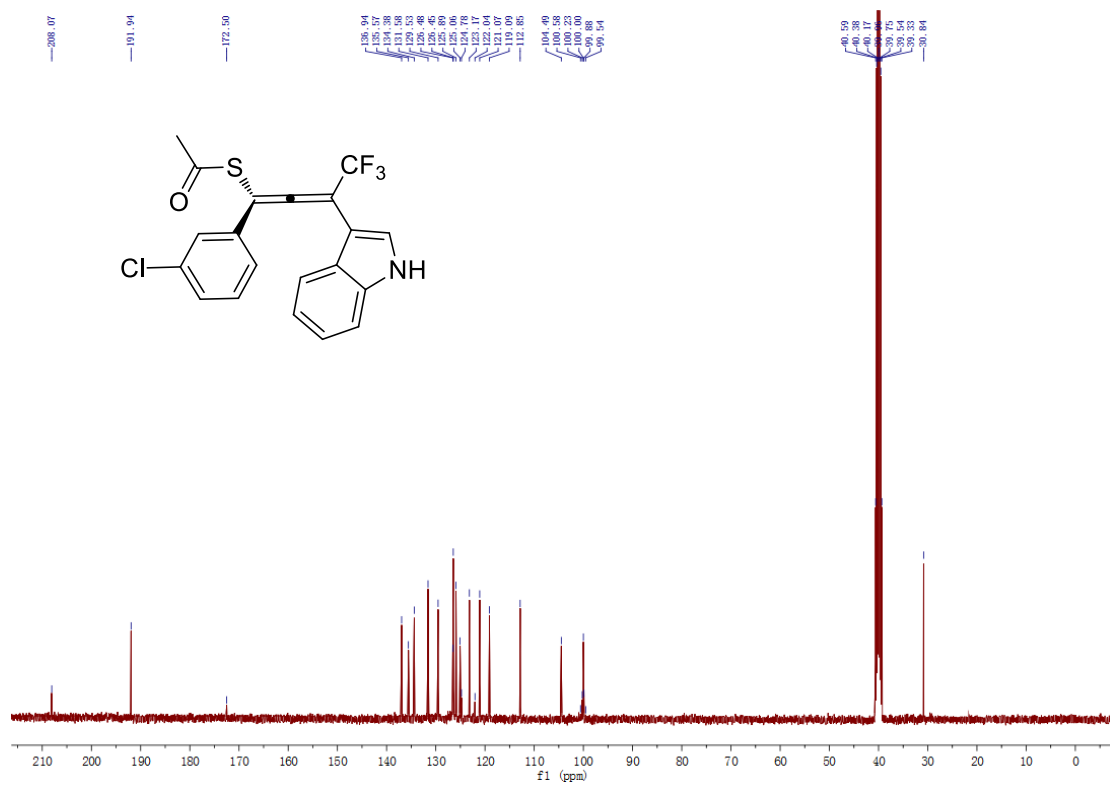





**(S)-S-(4,4,4-trifluoro-3-(1H-indol-3-yl)-1-(3-methoxyphenyl)buta-1,2-dien-1-yl) ethanethioate (3ia)**

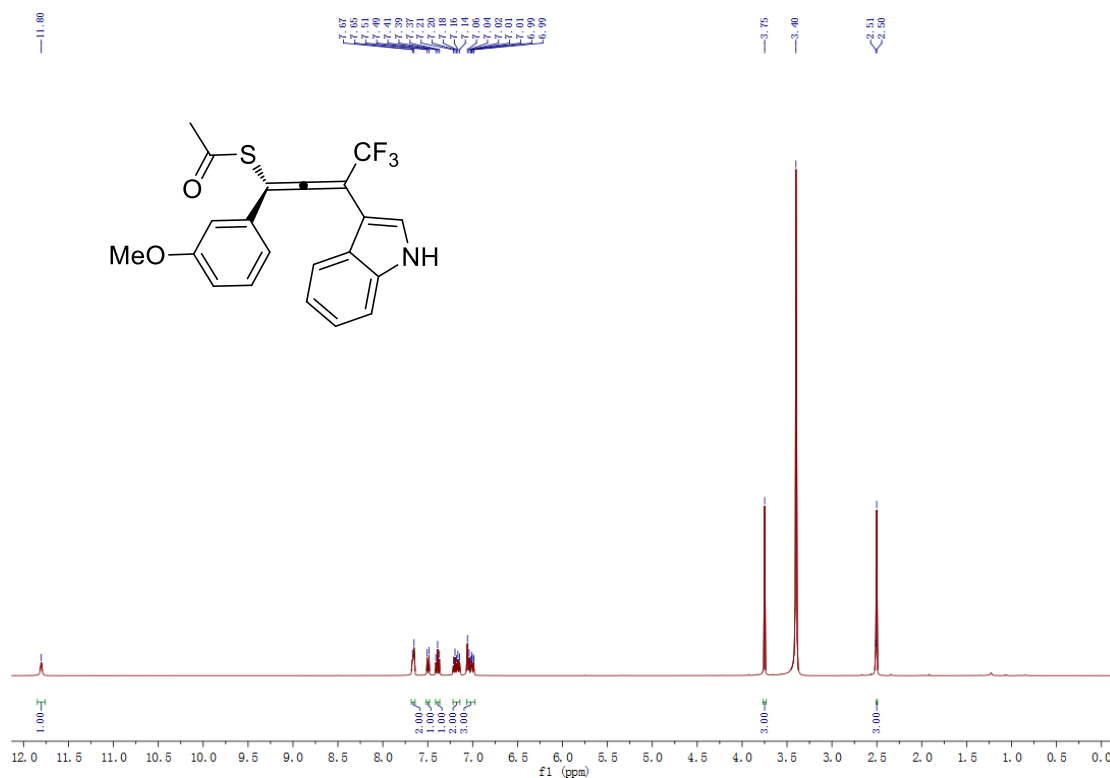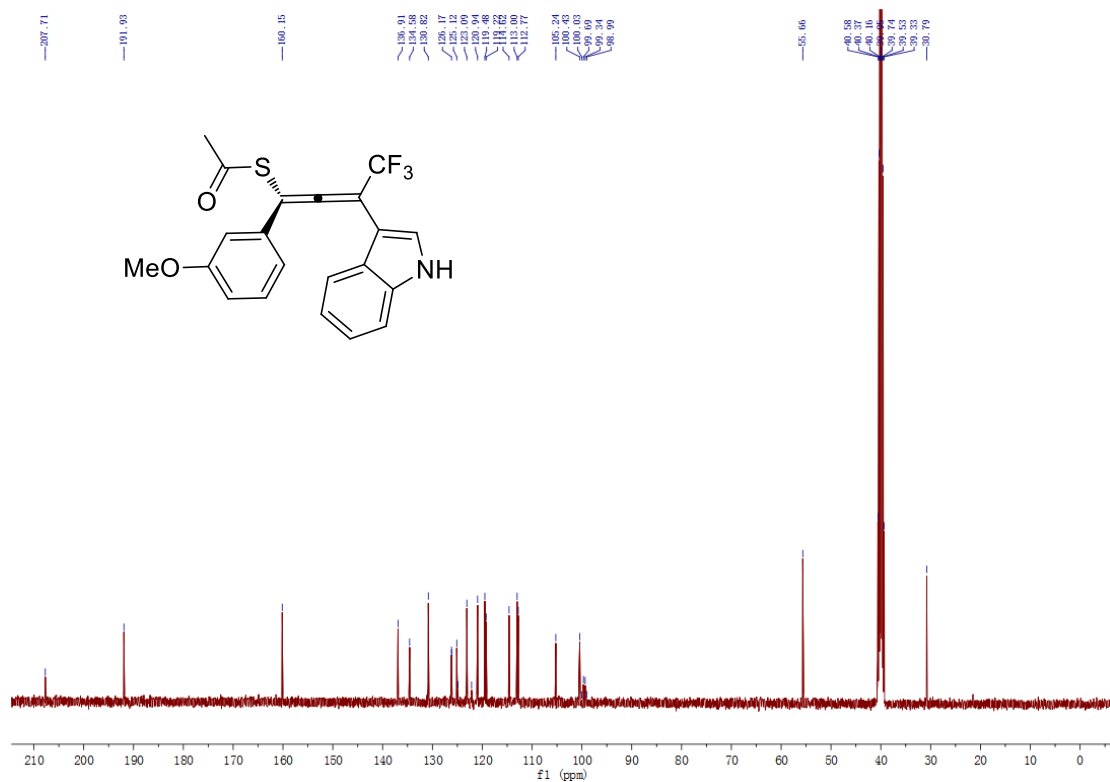

**(S)-S-(4,4,4-trifluoro-1-(2-fluorophenyl)-3-(1H-indol-3-yl)buta-1,2-dien-1-yl)ethanethioate (3ja)**

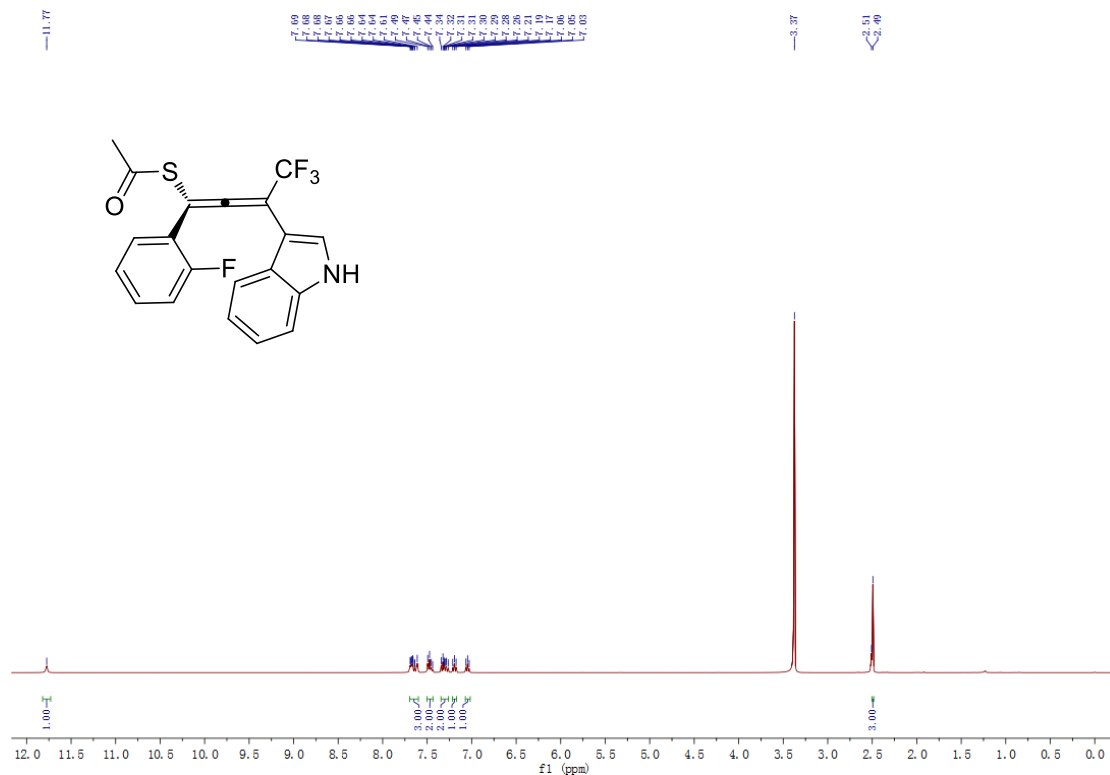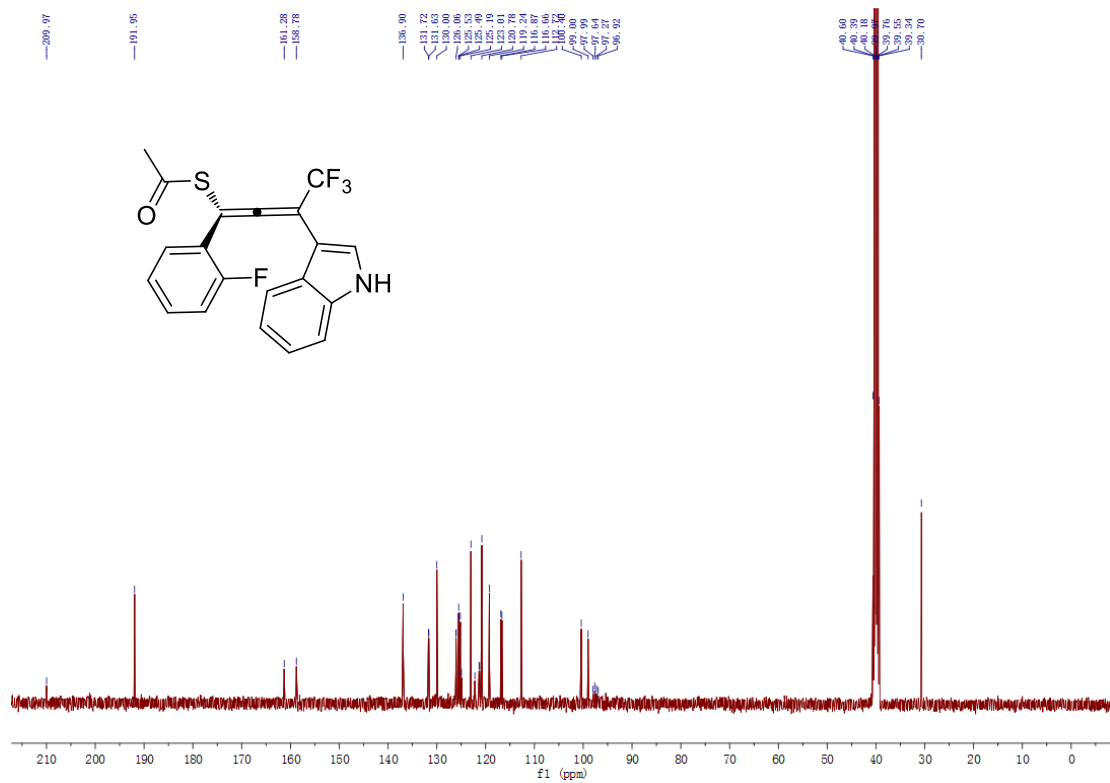

**(S)-S-(1-(2-chlorophenyl)-4,4,4-trifluoro-3-(1H-indol-3-yl)buta-1,2-dien-1-yl) ethanethioate (3ka)**

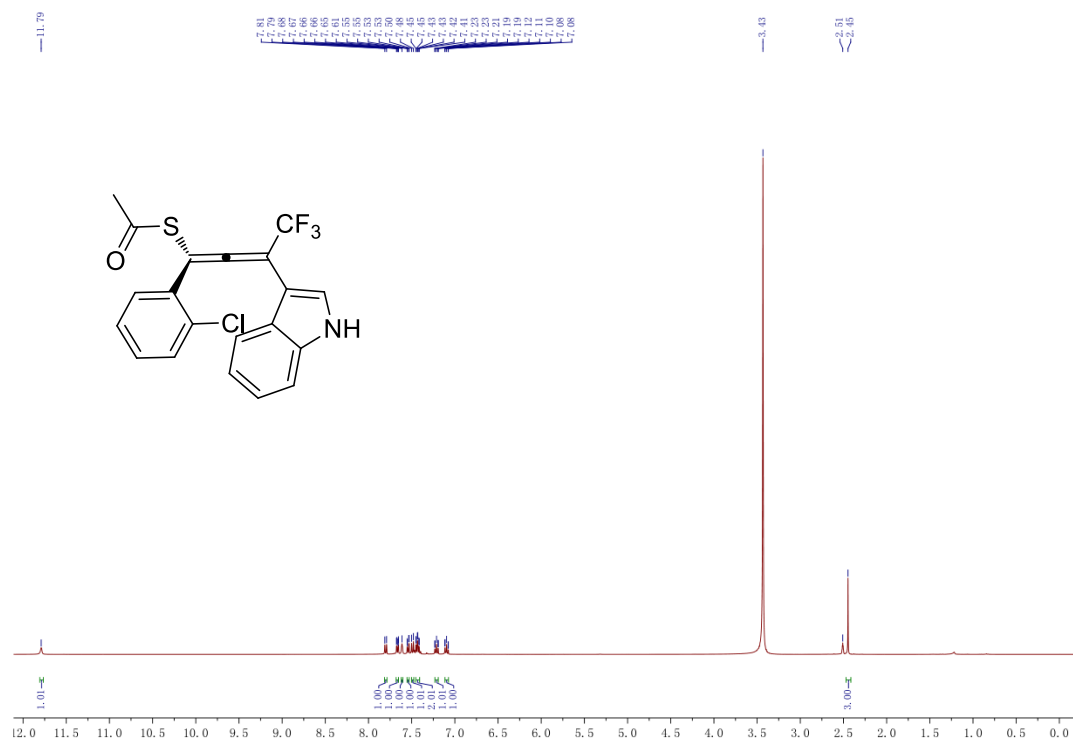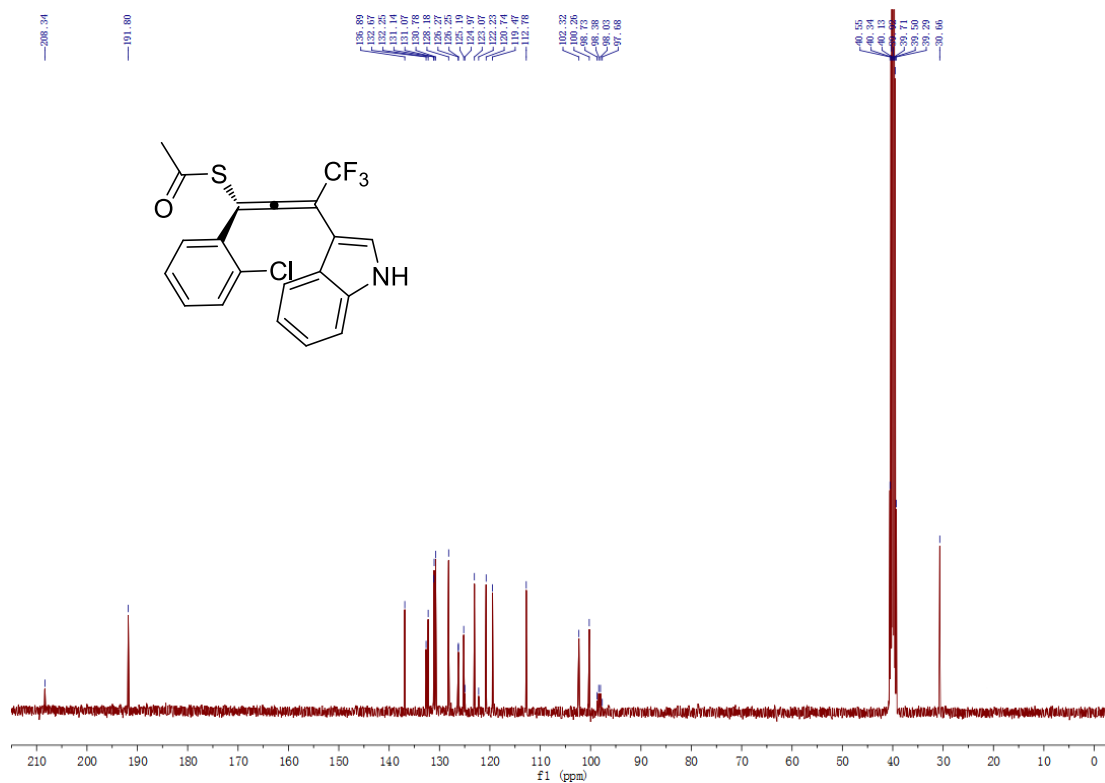

**(S)-S-(4,4,4-trifluoro-3-(1H-indol-3-yl)-1-(thiophen-3-yl)buta-1,2-dien-1-yl) ethanethioate (3la)**

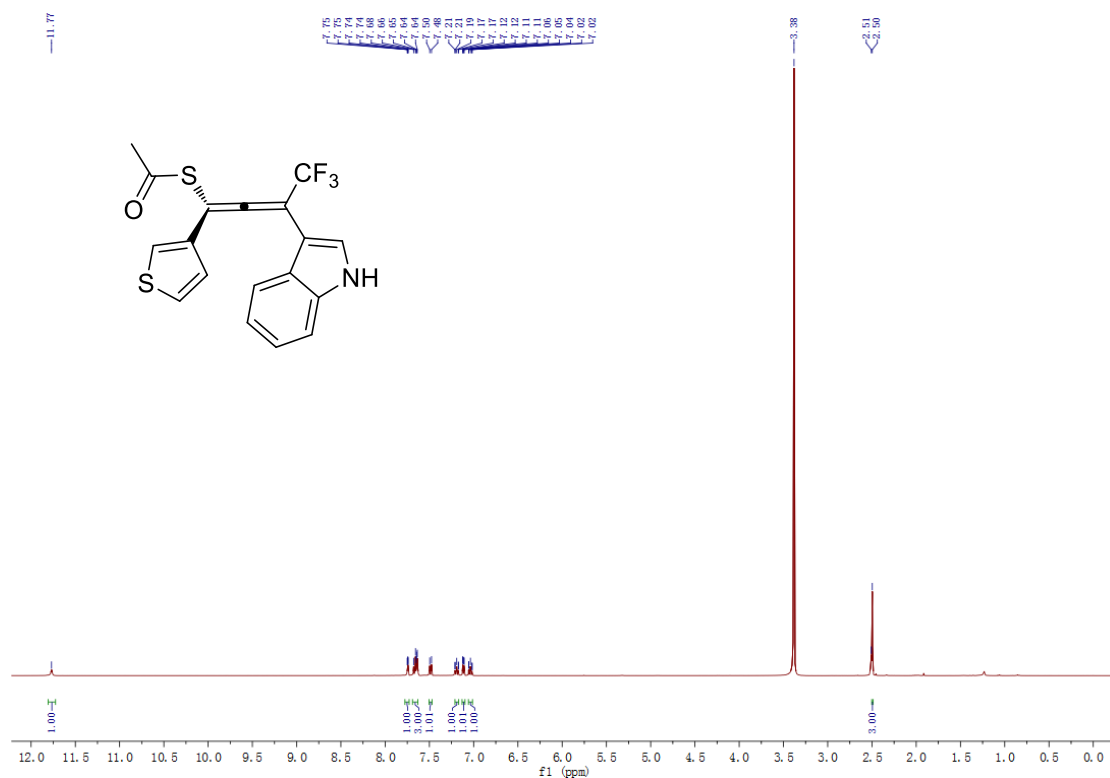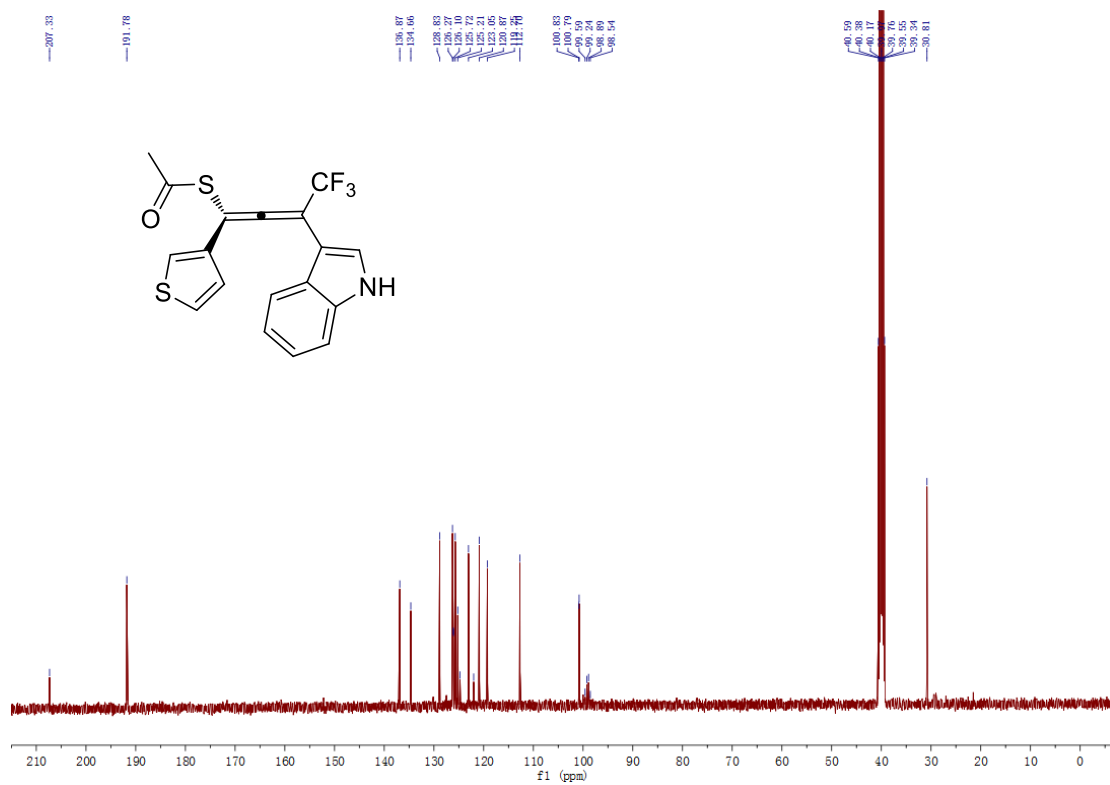

**(S)-S-(1,1,1-trifluoro-2-(1H-indol-3-yl)hepta-2,3-dien-4-yl) ethanethioate (3ma)**

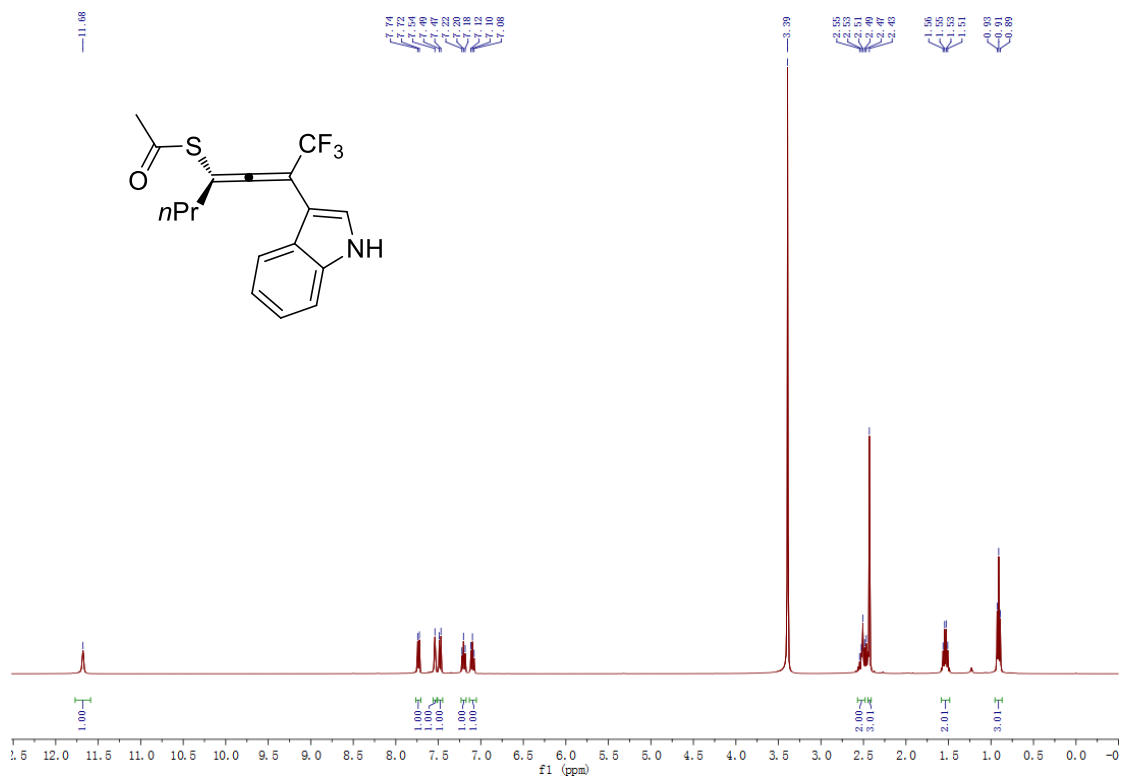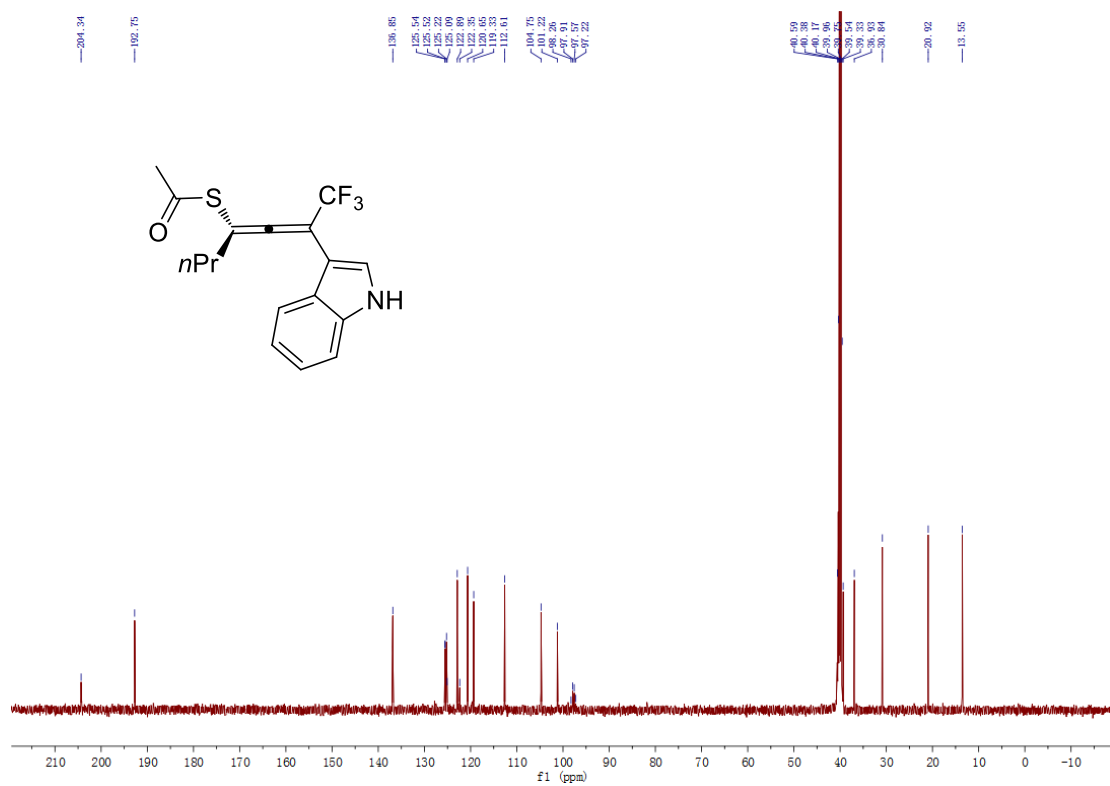

(S)-S-(1,1,1-trifluoro-2-(1H-indol-3-yl)octa-2,3-dien-4-yl) ethanethioate (3na)

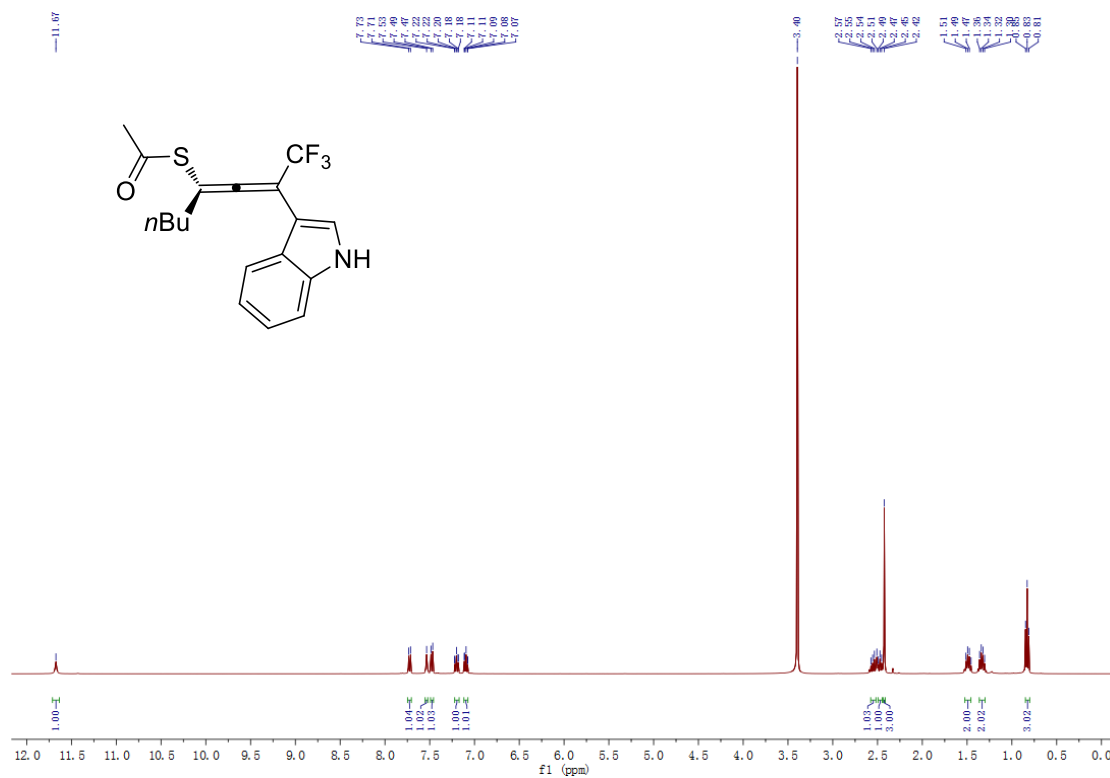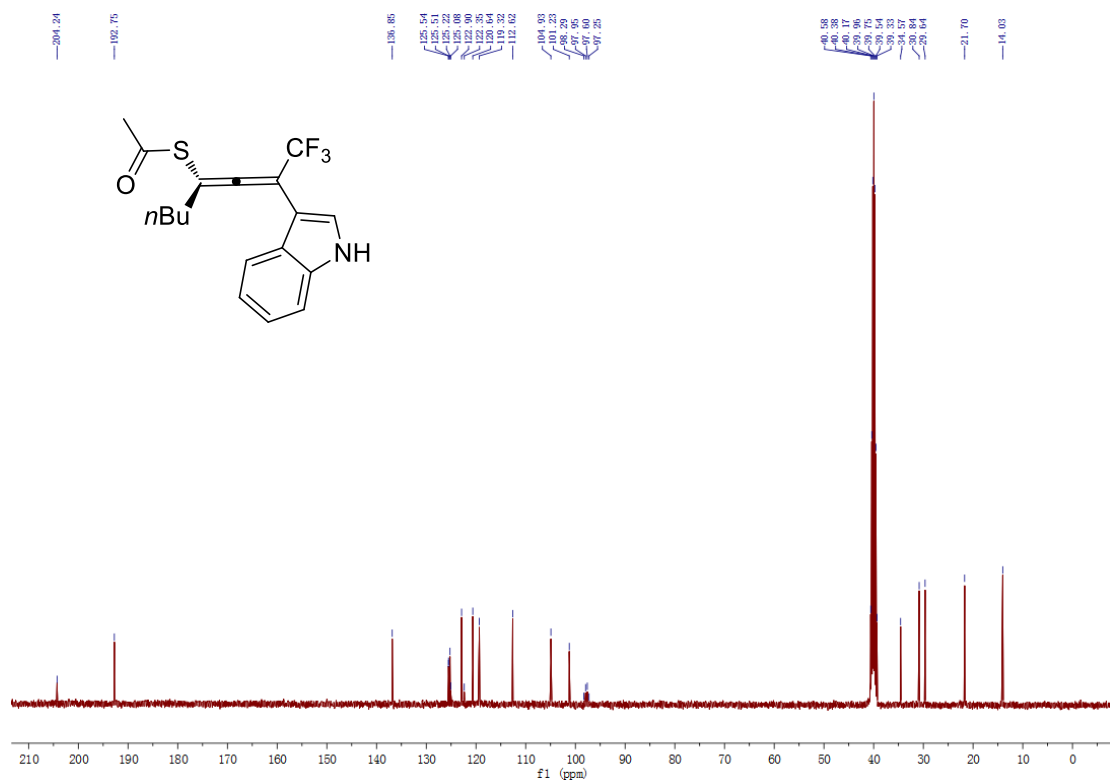

**(S)-S-(1-cyclopropyl-4,4,4-trifluoro-3-(1H-indol-3-yl)buta-1,2-dien-1-yl) ethanethioate (30a)**

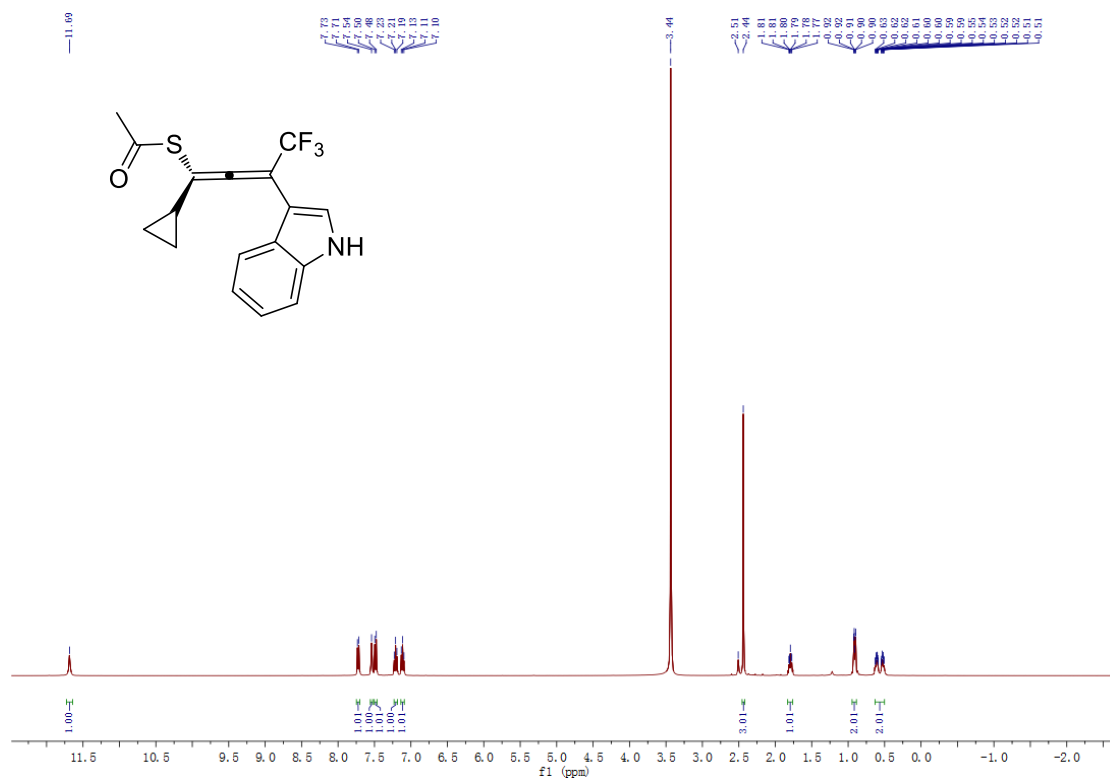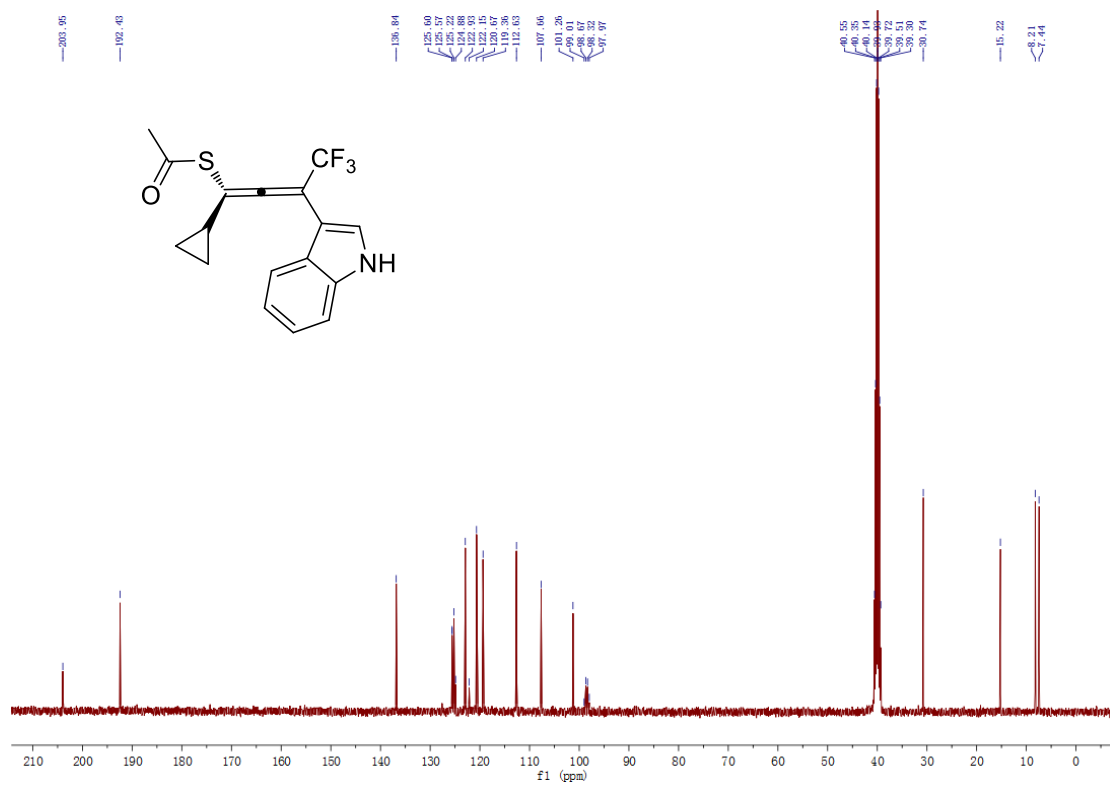

**(S)-S-(4,4,4-trifluoro-3-(5-fluoro-1H-indol-3-yl)-1-phenylbuta-1,2-dien-1-yl) ethanethioate (3pa)**

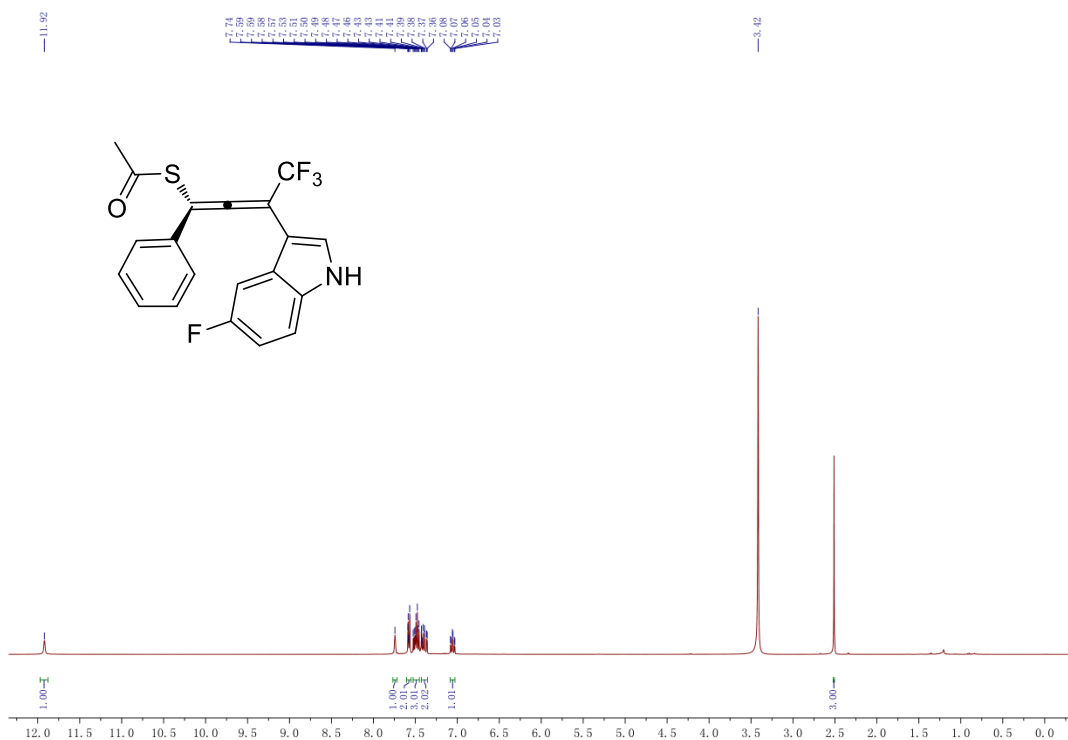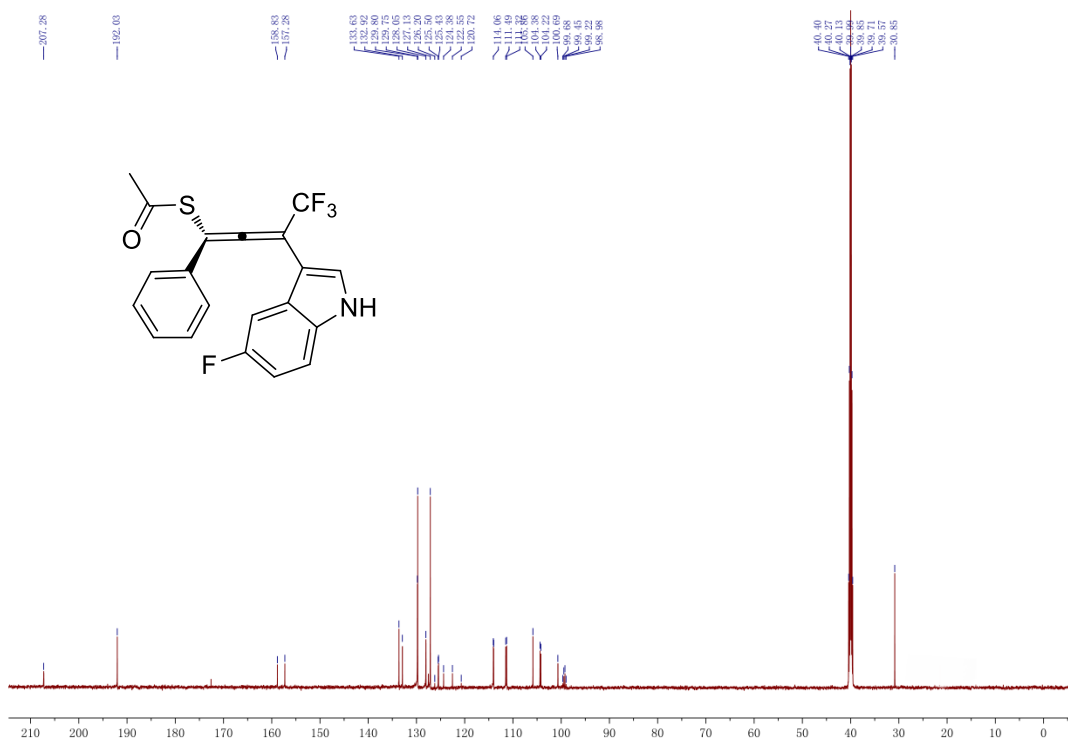



**(S)-S-(3-(5-chloro-1H-indol-3-yl)-4,4,4-trifluoro-1-phenylbuta-1,2-dien-1-yl) ethanethioate (3qa)**

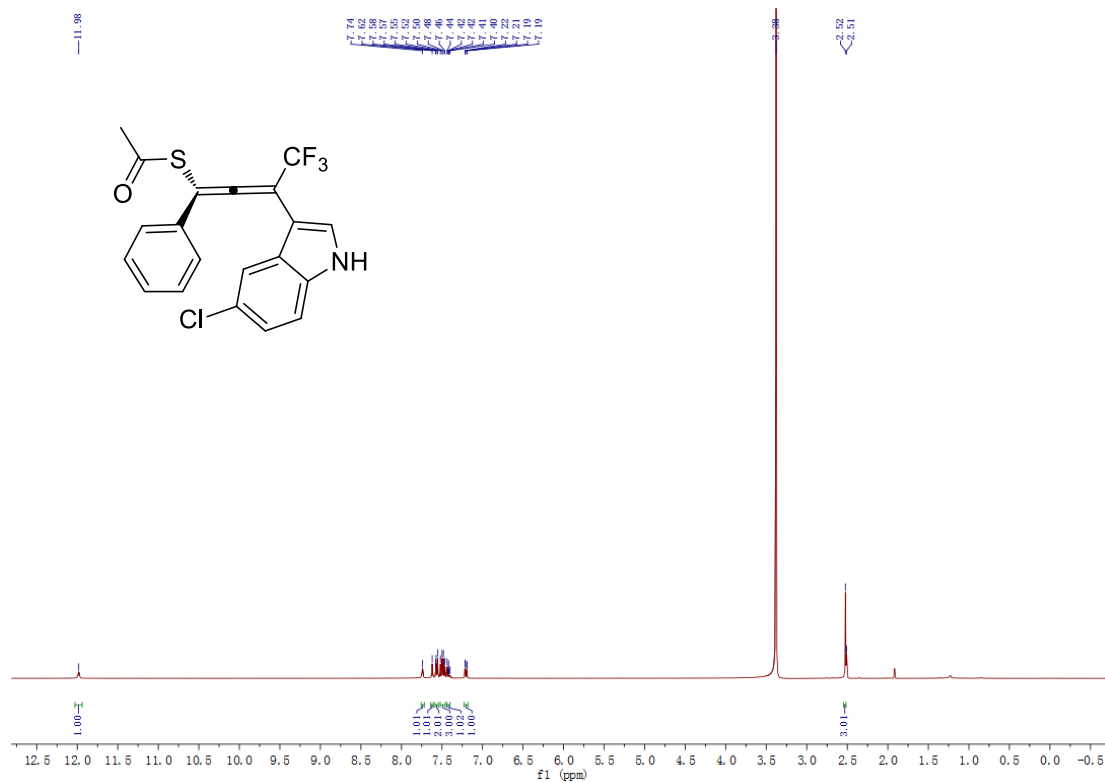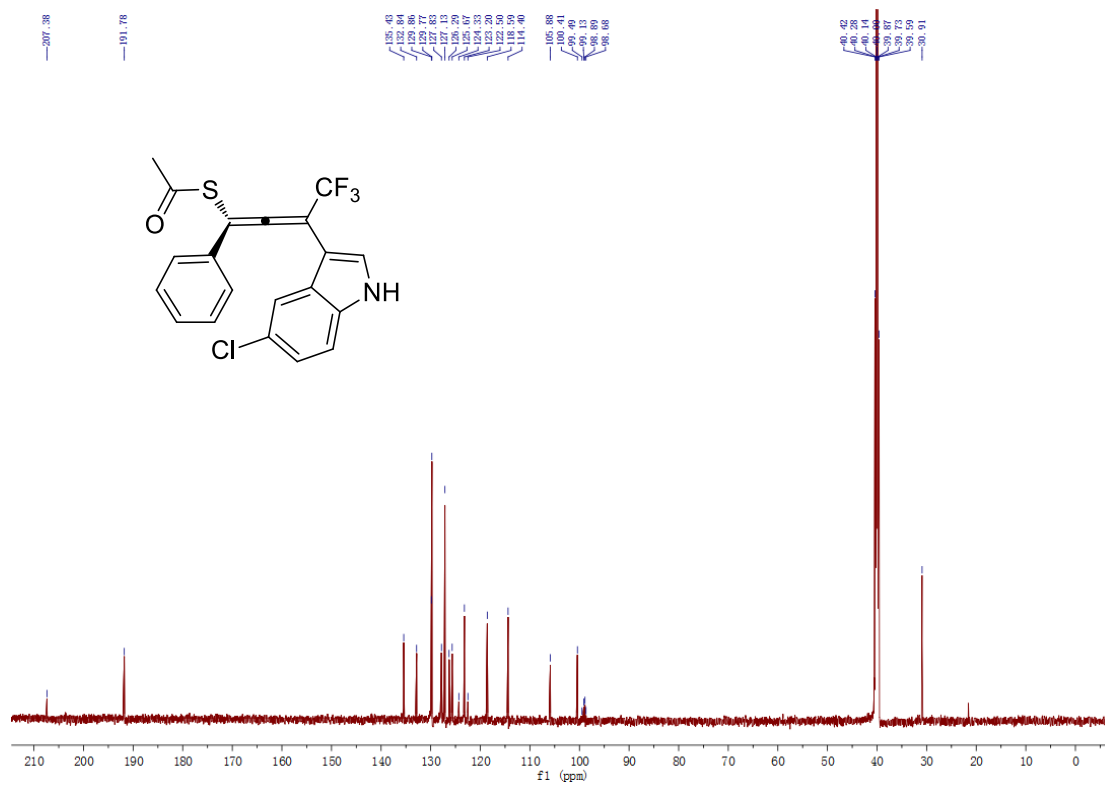

**(S)-S-(3-(5-bromo-1H-indol-3-yl)-4,4,4-trifluoro-1-phenylbuta-1,2-dien-1-yl) ethanethioate (3ra)**

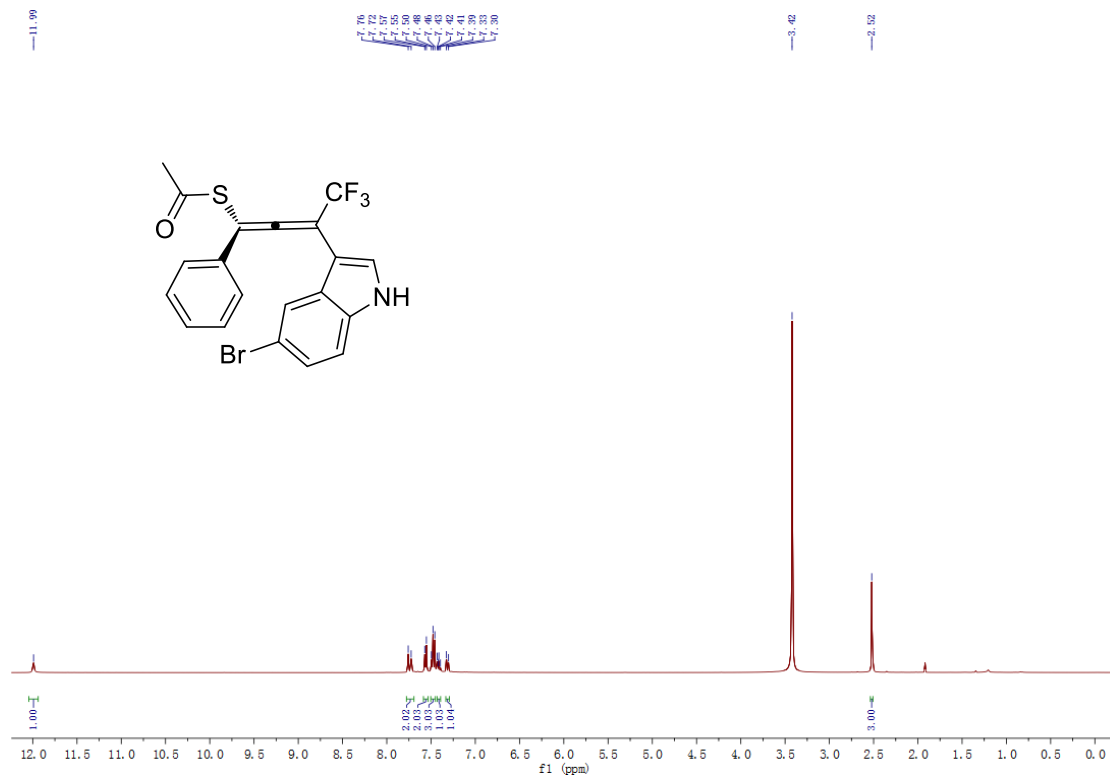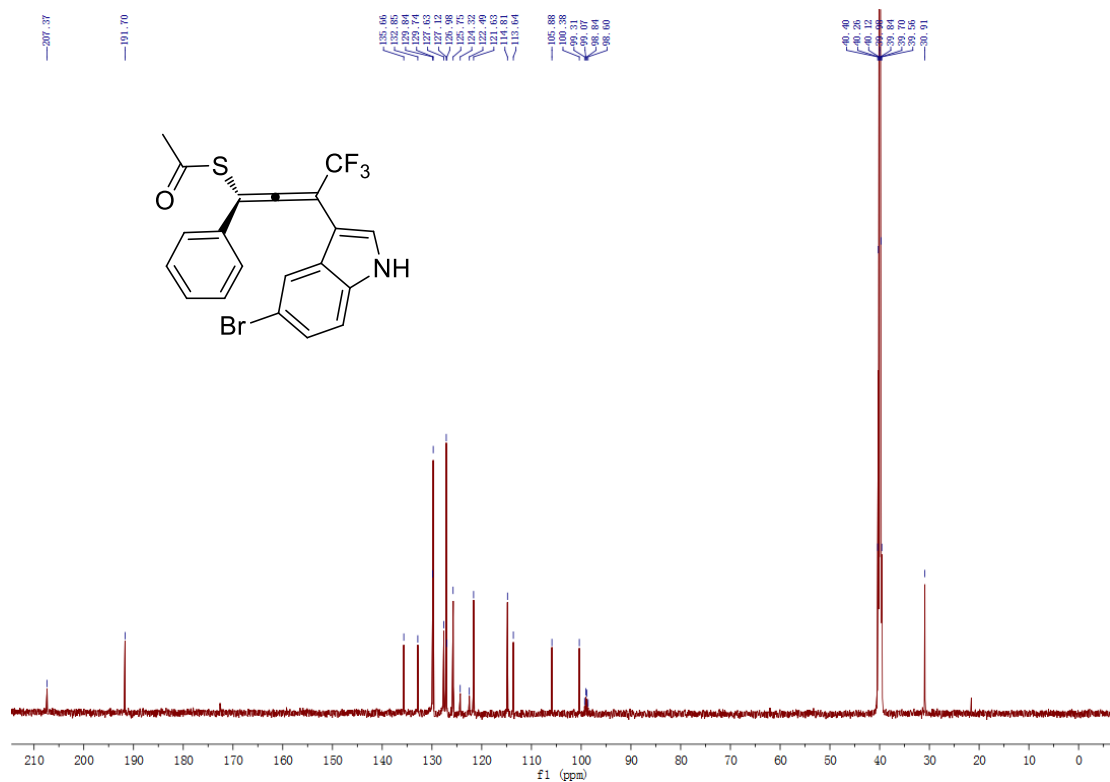

**(S)-S-(4,4,4-trifluoro-3-(5-methyl-1H-indol-3-yl)-1-phenylbuta-1,2-dien-1-yl) ethanethioate (3sa)**

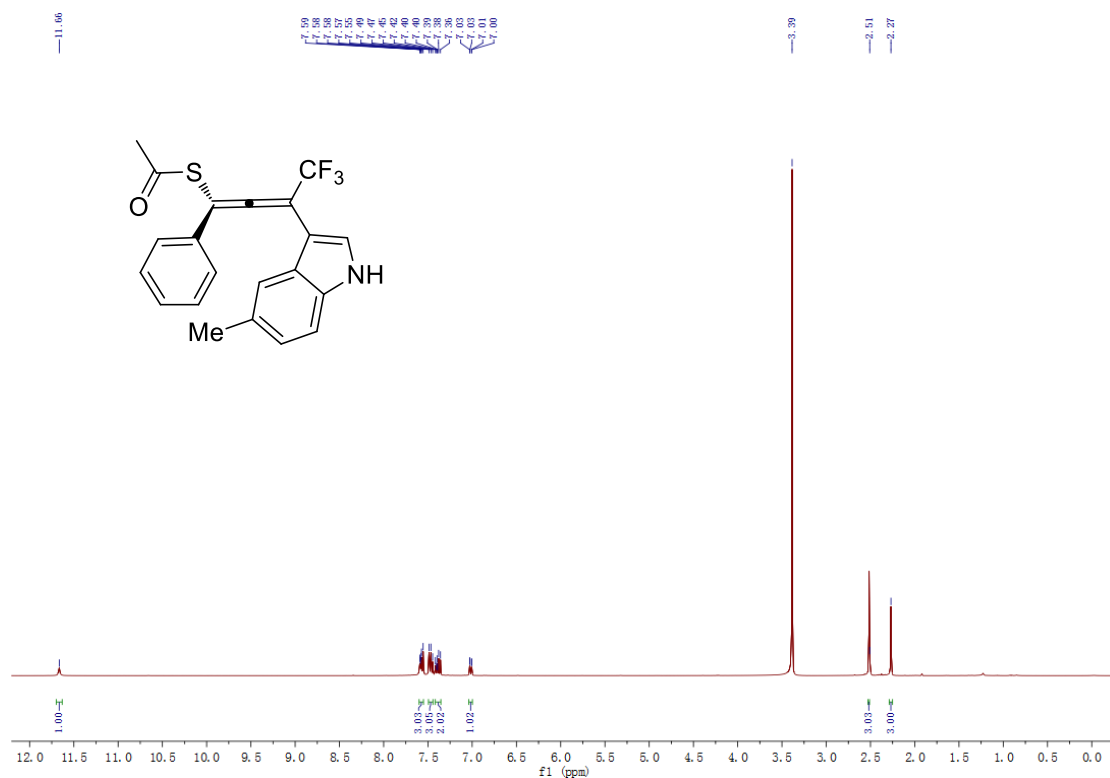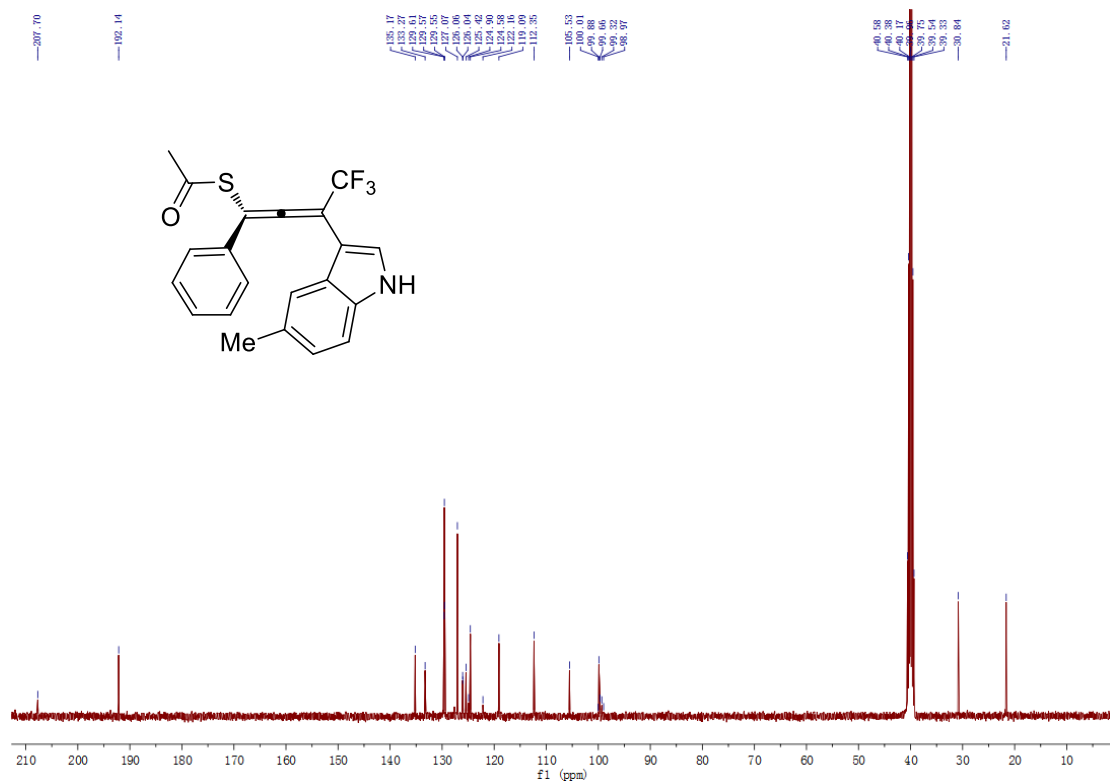



**(S)-S-(4,4,4-trifluoro-3-(6-methyl-1H-indol-3-yl)-1-phenylbuta-1,2-dien-1-yl) ethanethioate (3ua)**

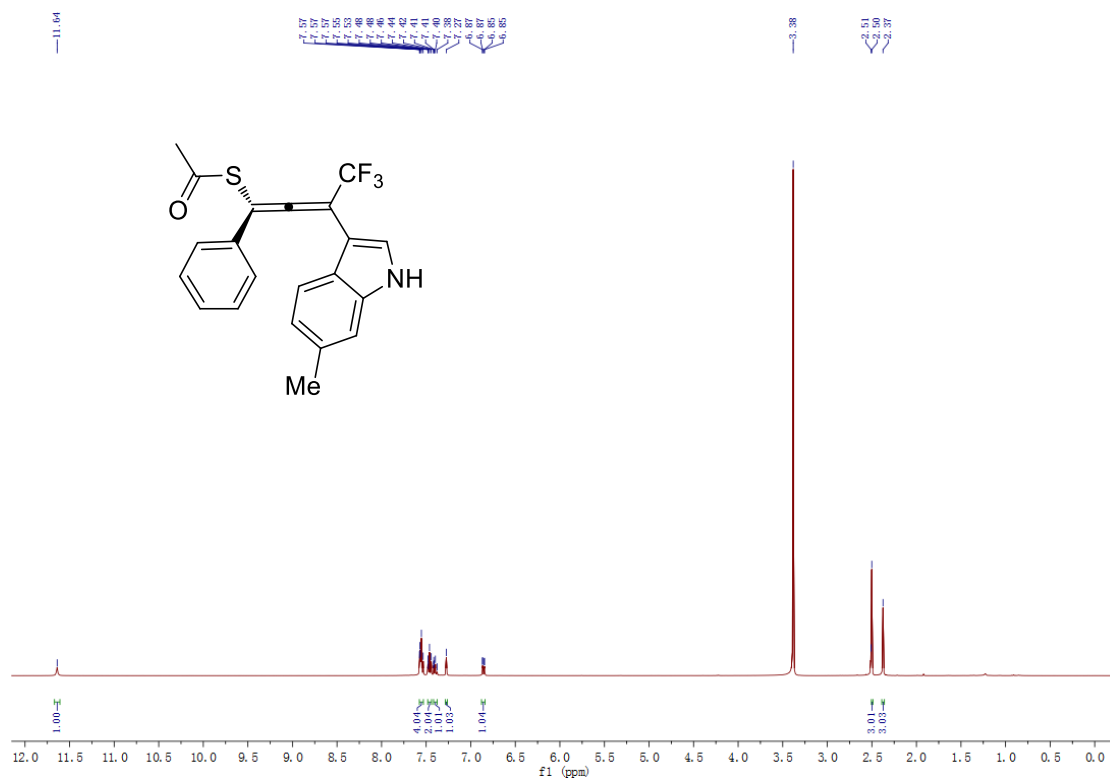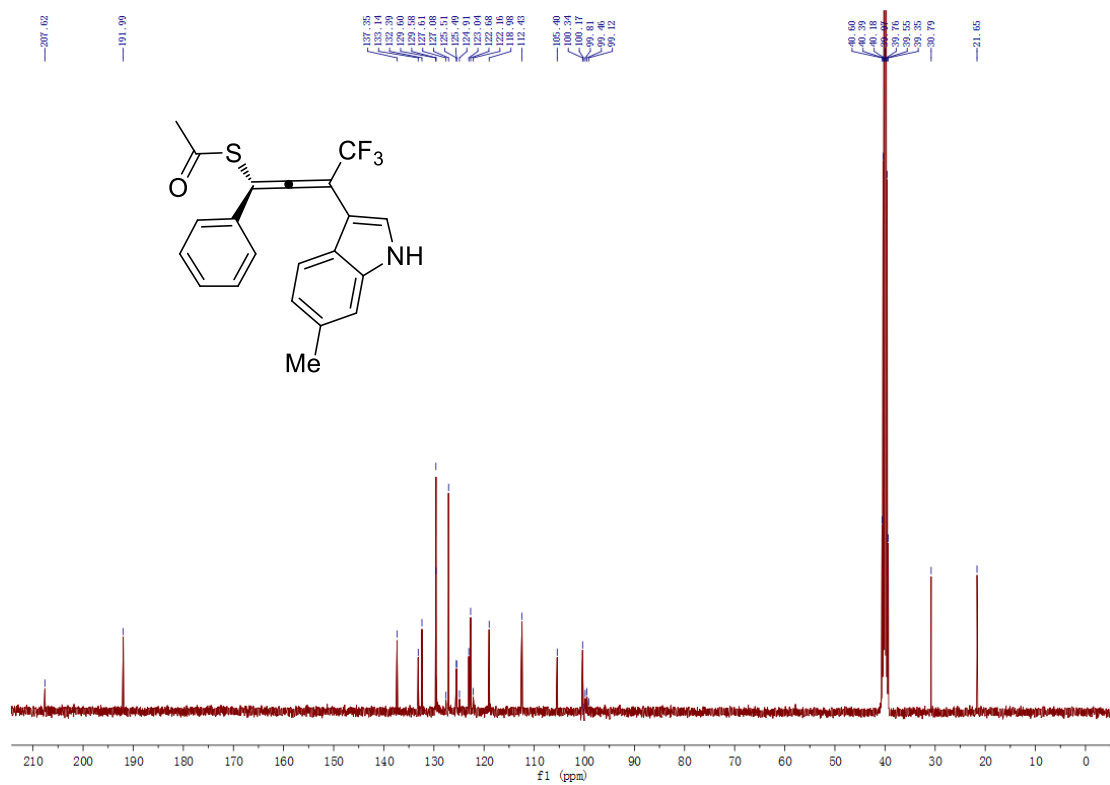

**(S)-S-(4,4,4-trifluoro-3-(7-methyl-1H-indol-3-yl)-1-phenylbuta-1,2-dien-1-yl) ethanethioate (3va)**

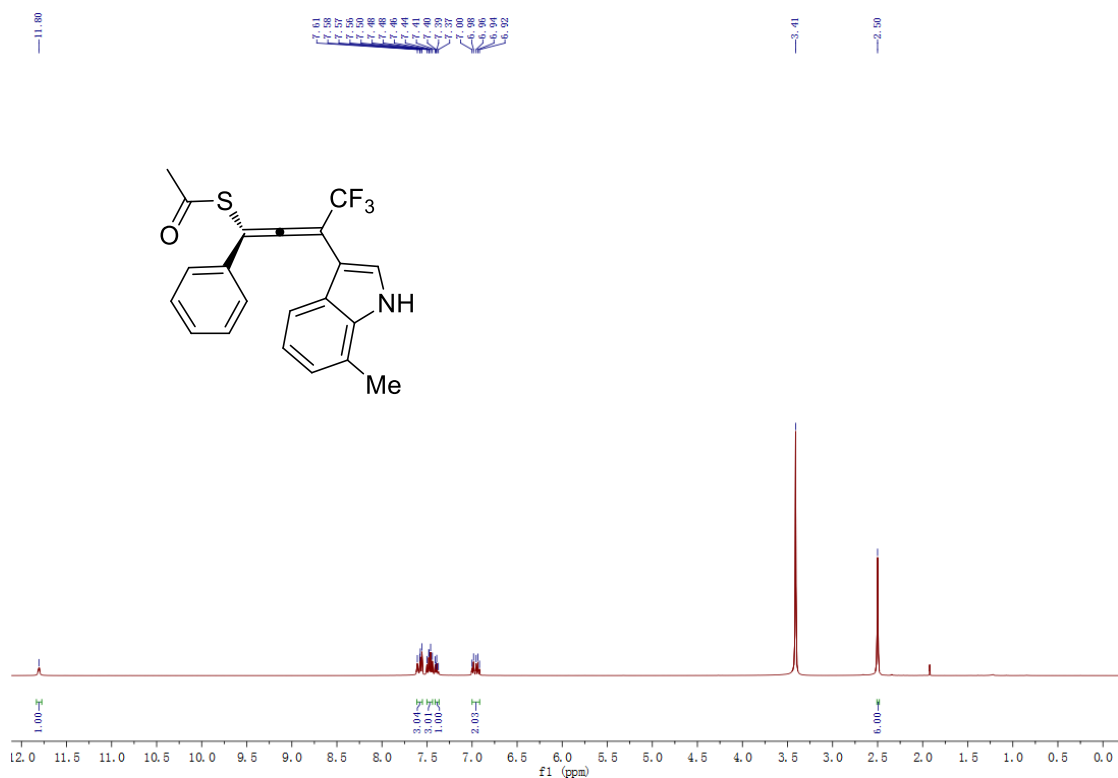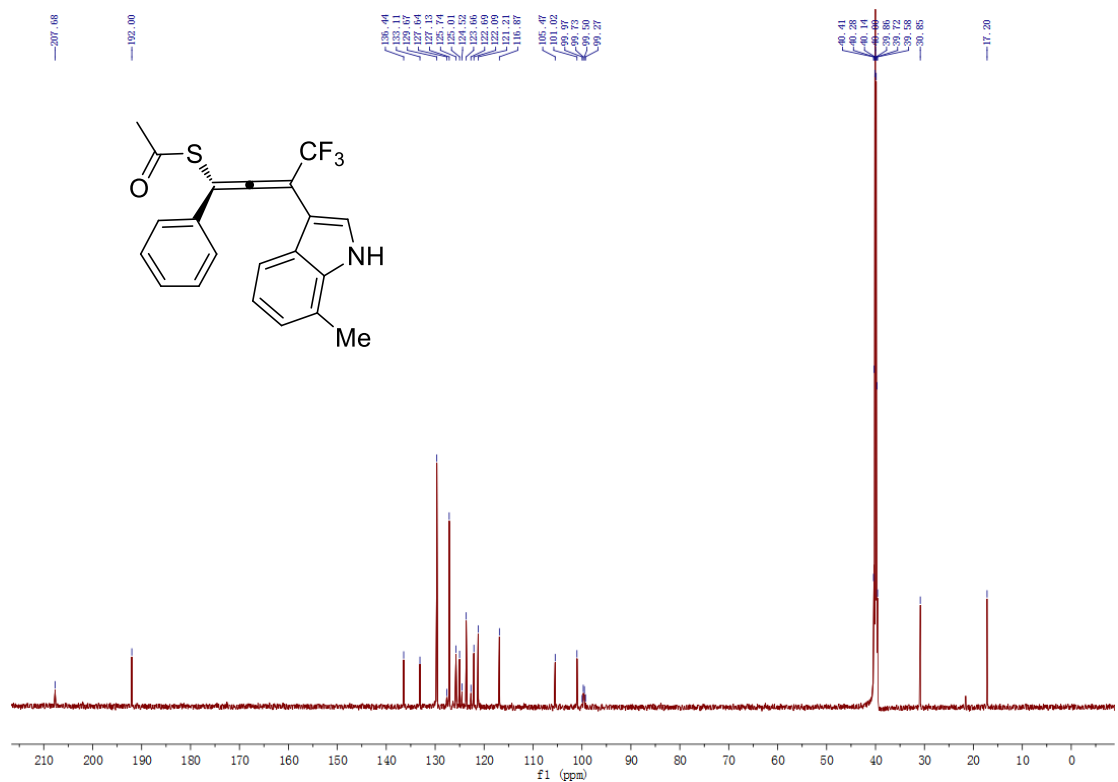

**(S)-S-(4,4,4-trifluoro-3-(1H-indol-3-yl)-1-phenylbuta-1,2-dien-1-yl) benzothioate (3ab)**

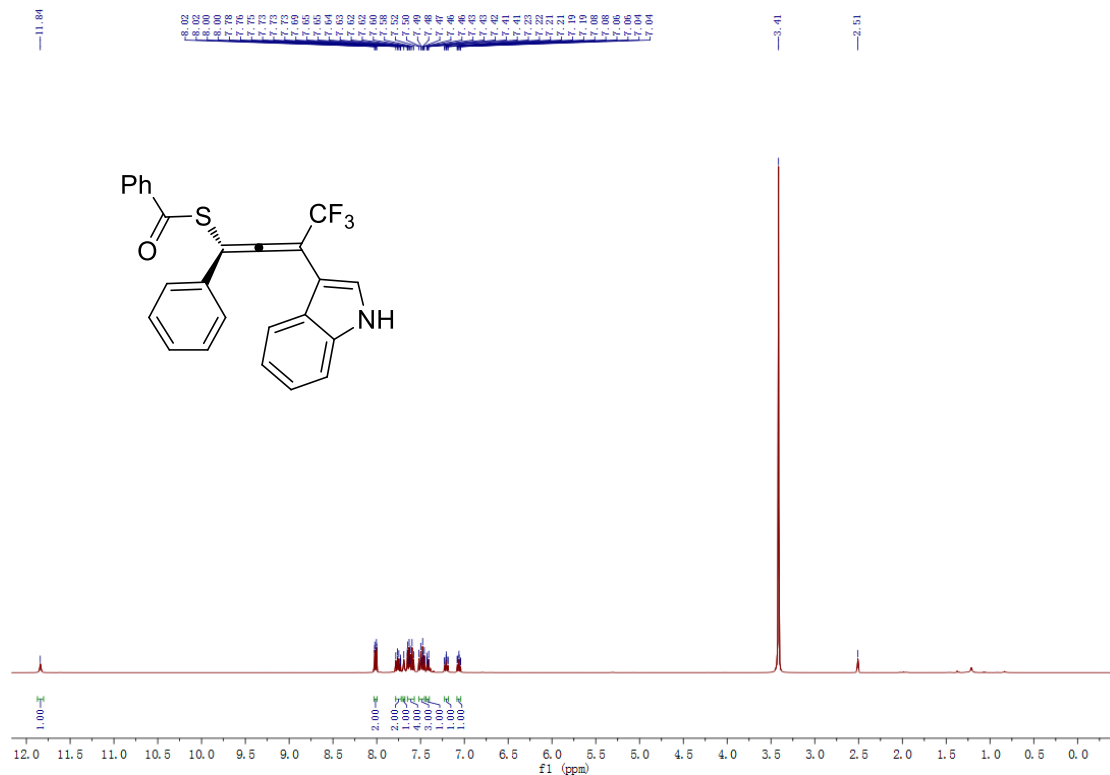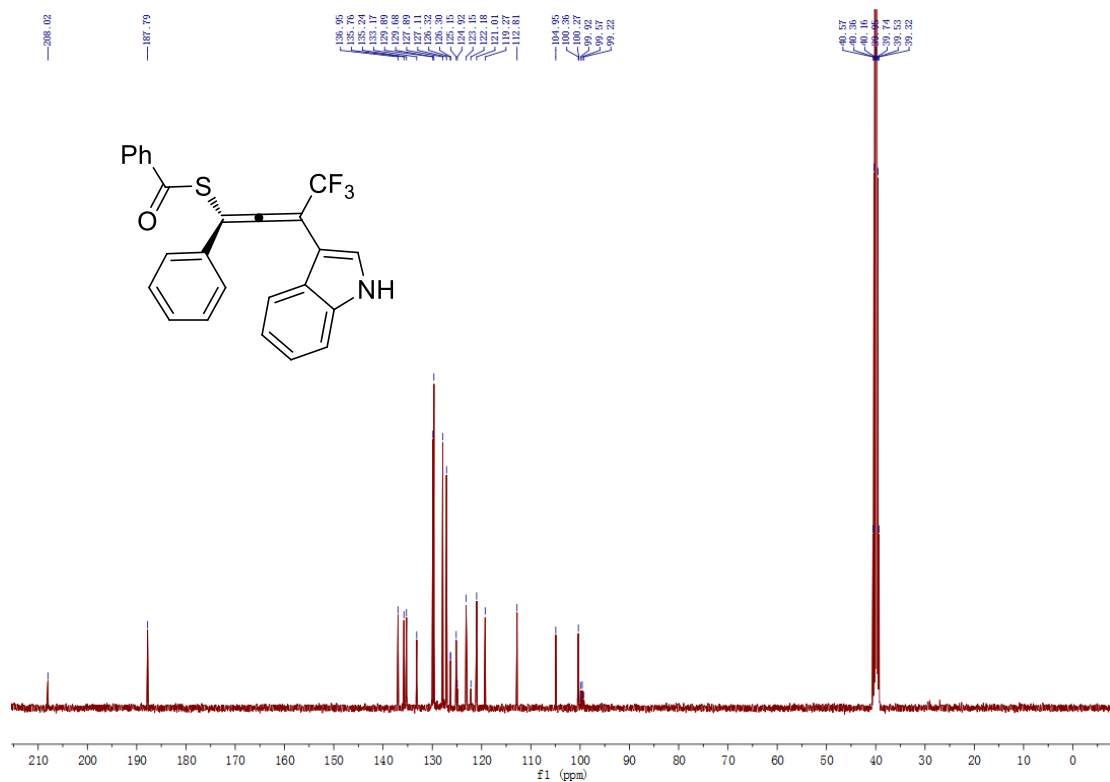

**(S)-S-(4,4,4-trifluoro-3-(1H-indol-3-yl)-1-phenylbuta-1,2-dien-1-yl) ethanethioate (3aa)**

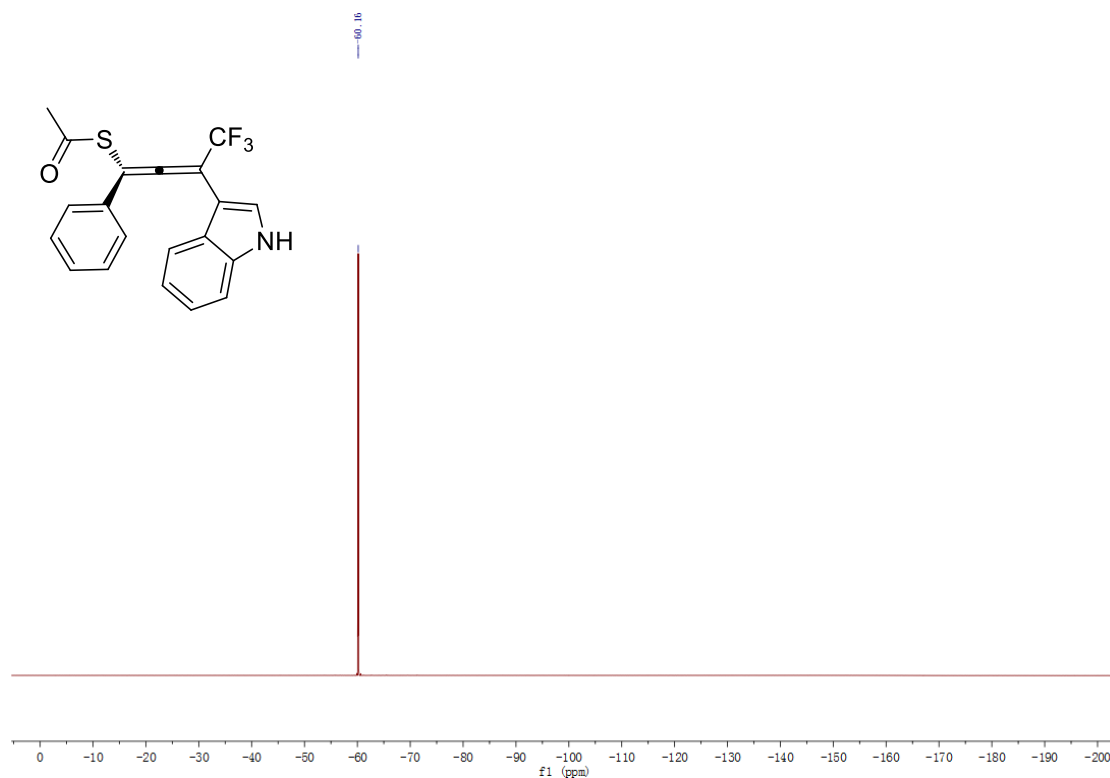

**(S)-S-(1-(4-chlorophenyl)-4,4,4-trifluoro-3-(1H-indol-3-yl)buta-1,2-dien-1-yl) ethanethioate (3ba)**

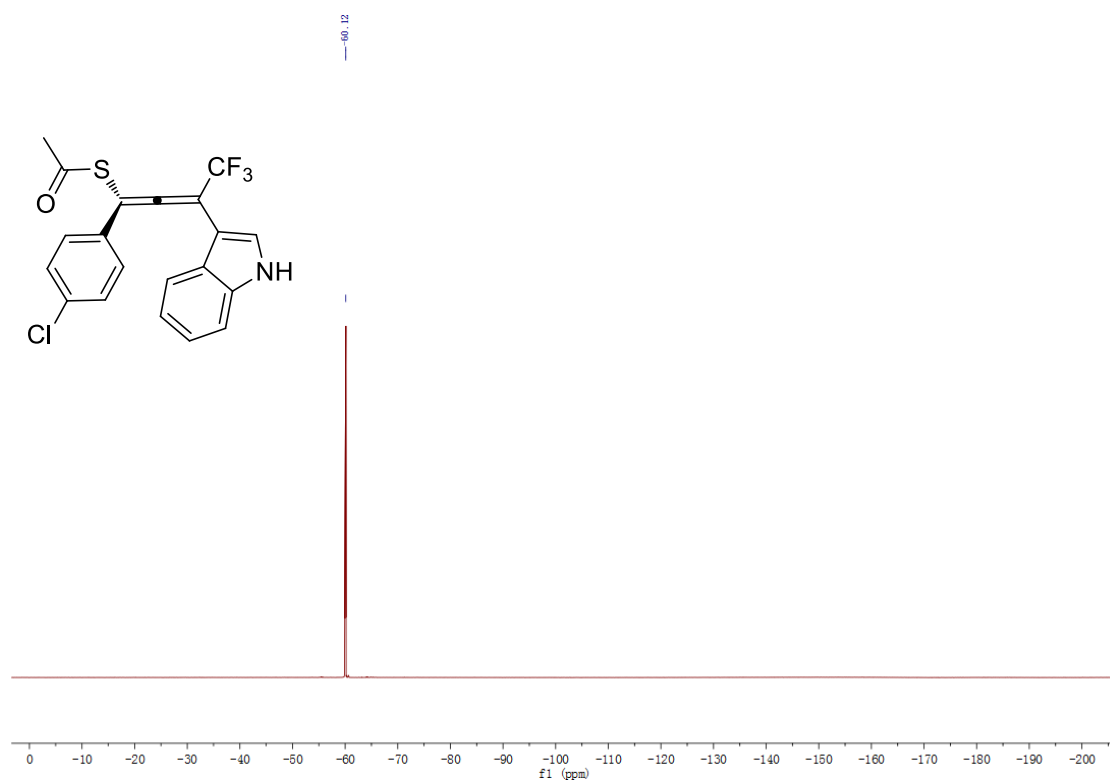



**(S)-S-(1-(4-bromophenyl)-4,4,4-trifluoro-3-(1H-indol-3-yl)buta-1,2-dien-1-yl) ethanethioate (3ca)**

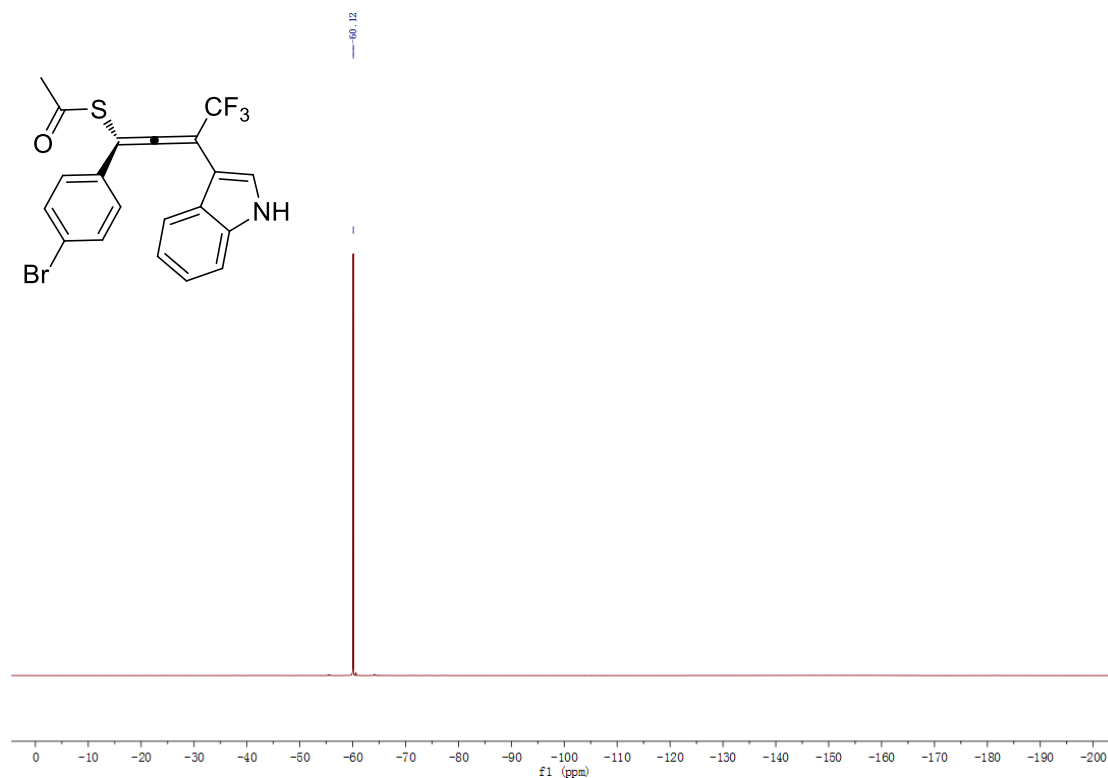

**(S)-S-(4,4,4-trifluoro-3-(1H-indol-3-yl)-1-(p-tolyl)buta-1,2-dien-1-yl) ethanethioate (3da)**

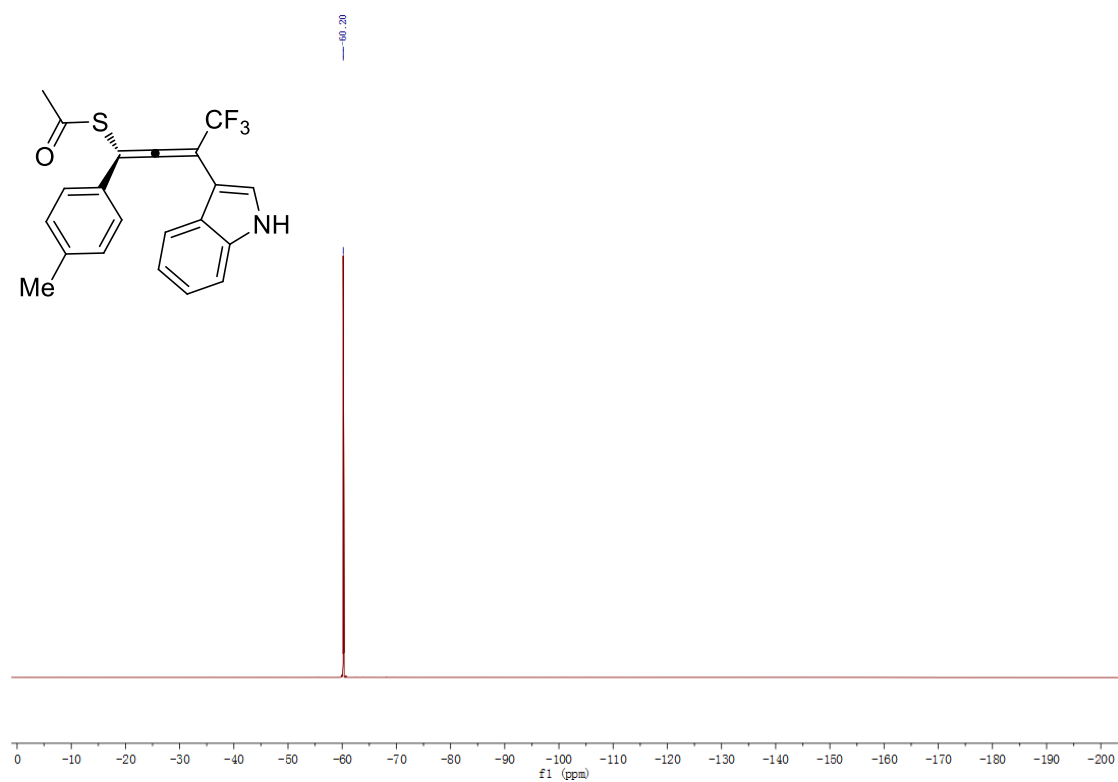

**(S)-S-(4,4,4-trifluoro-3-(1H-indol-3-yl)-1-(4-methoxyphenyl)buta-1,2-dien-1-yl) ethanethioate (3ea)**

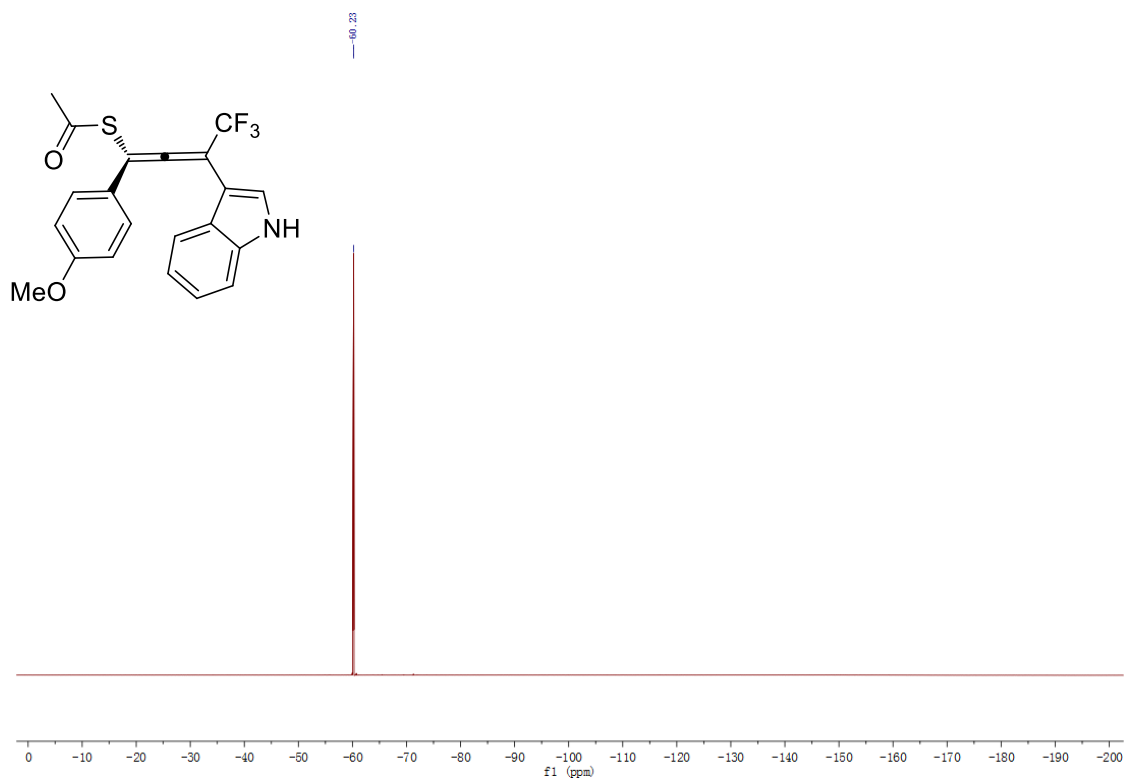

**(S)-S-(4,4,4-trifluoro-1-(3-fluorophenyl)-3-(1H-indol-3-yl)buta-1,2-dien-1-yl) ethanethioate (3fa)**

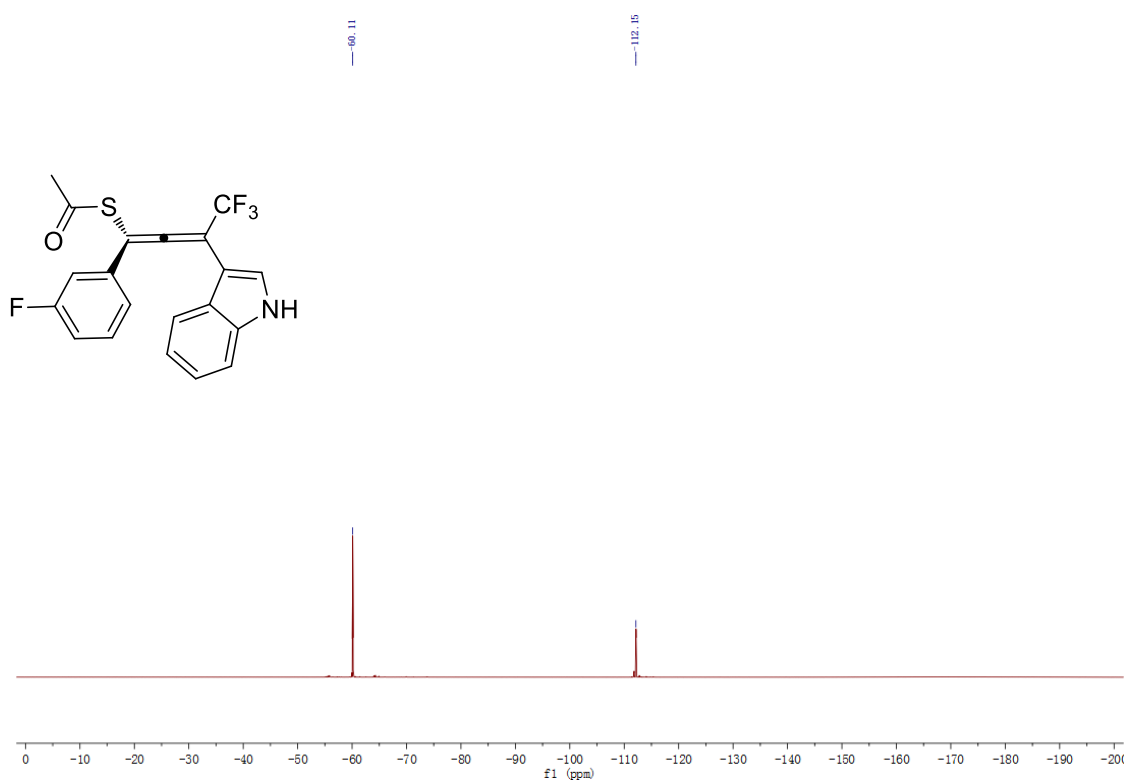

**(S)-S-(1-(3-chlorophenyl)-4,4,4-trifluoro-3-(1H-indol-3-yl)buta-1,2-dien-1-yl)ethanethioate (3ga)**

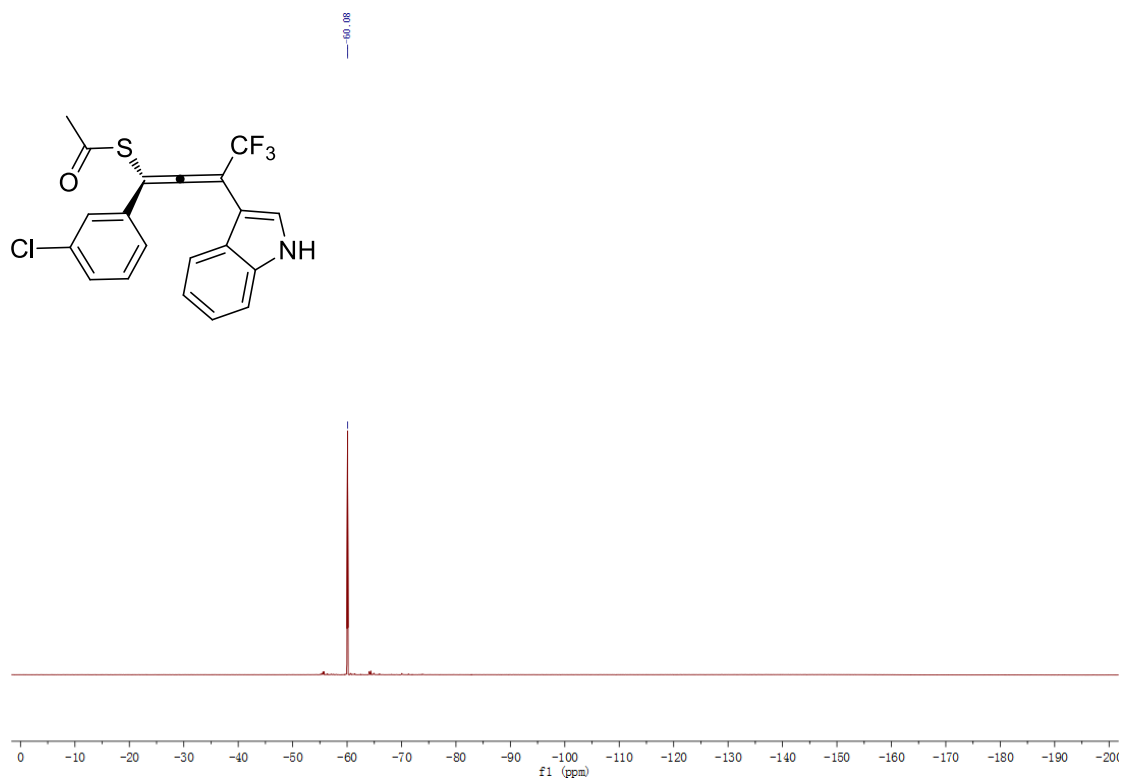

**(S)-S-(4,4,4-trifluoro-3-(1H-indol-3-yl)-1-(m-tolyl)buta-1,2-dien-1-yl)ethanethioate (3ha)**

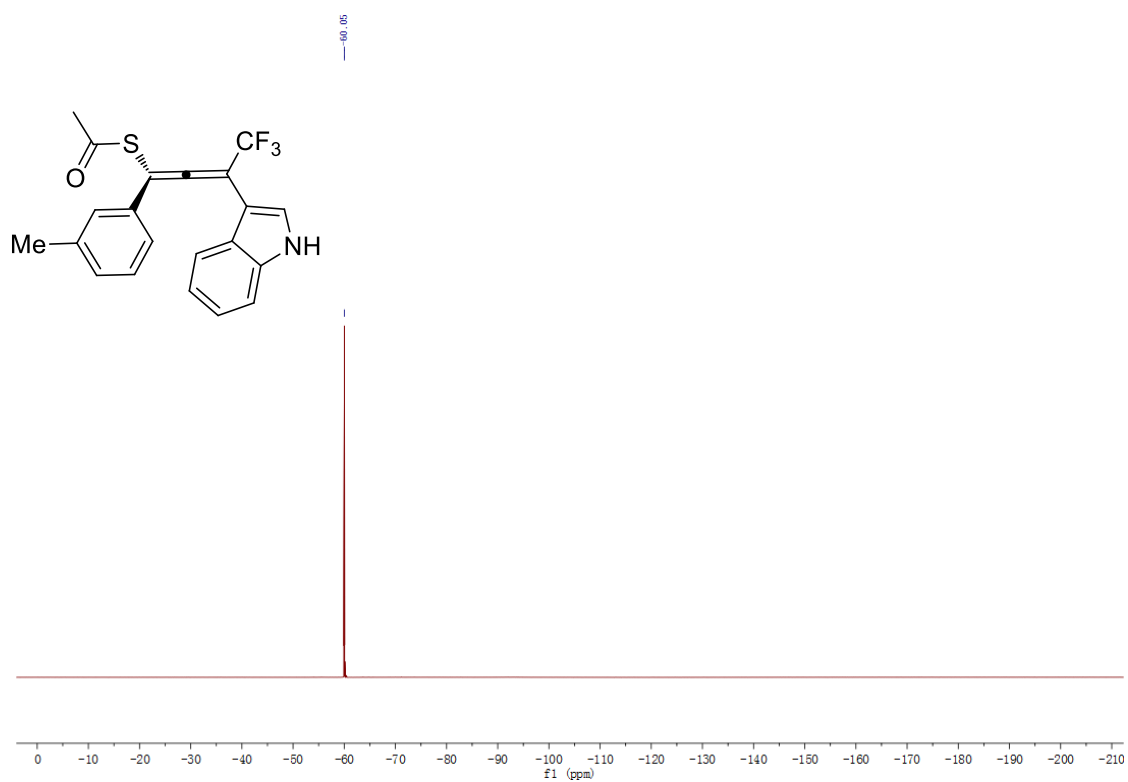

**(S)-S-(4,4,4-trifluoro-3-(1H-indol-3-yl)-1-(3-methoxyphenyl)buta-1,2-dien-1-yl) ethanethioate (3ia)**

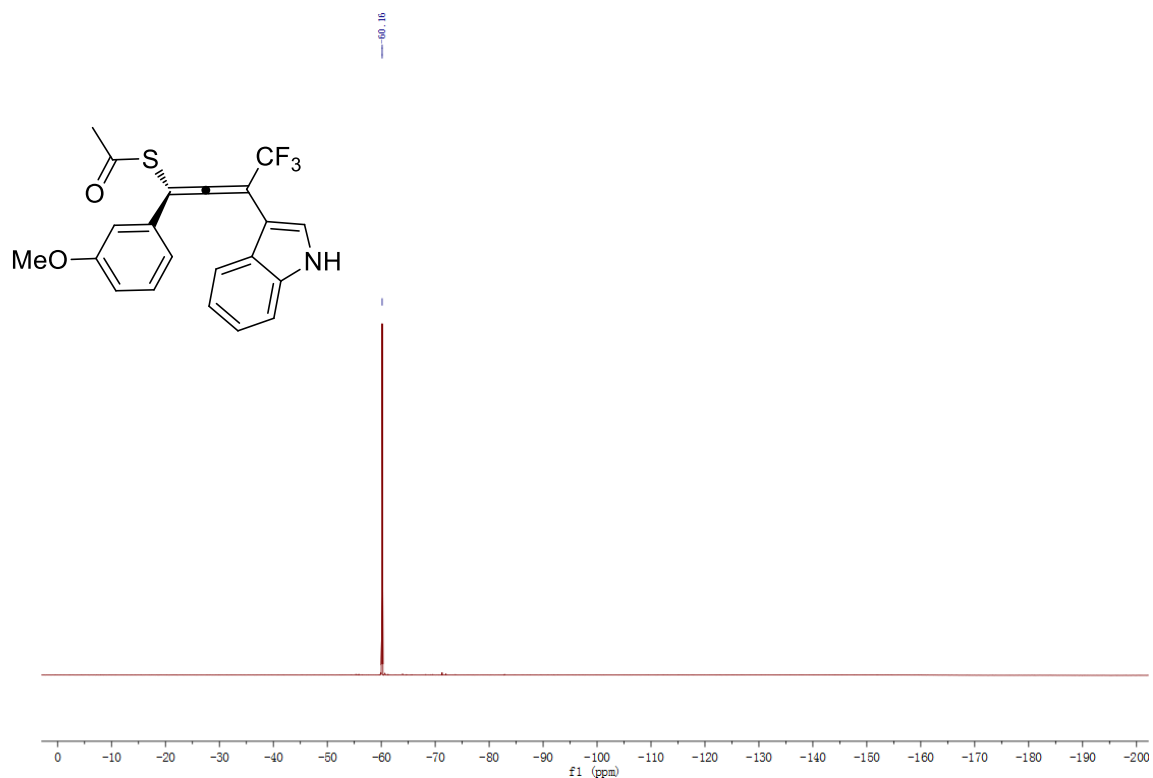

**(S)-S-(4,4,4-trifluoro-1-(2-fluorophenyl)-3-(1H-indol-3-yl)buta-1,2-dien-1-yl) ethanethioate (3ja)**

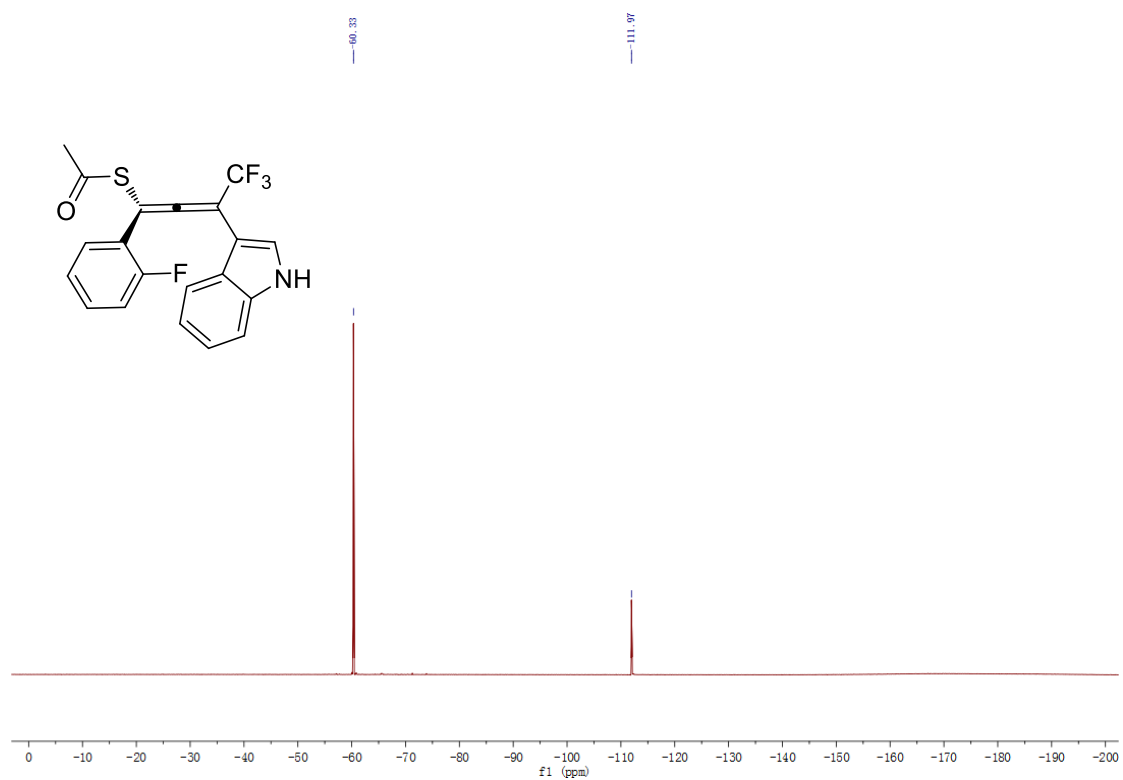

**(S)-S-(1-(2-chlorophenyl)-4,4,4-trifluoro-3-(1H-indol-3-yl)buta-1,2-dien-1-yl)ethanethioate (3ka)**

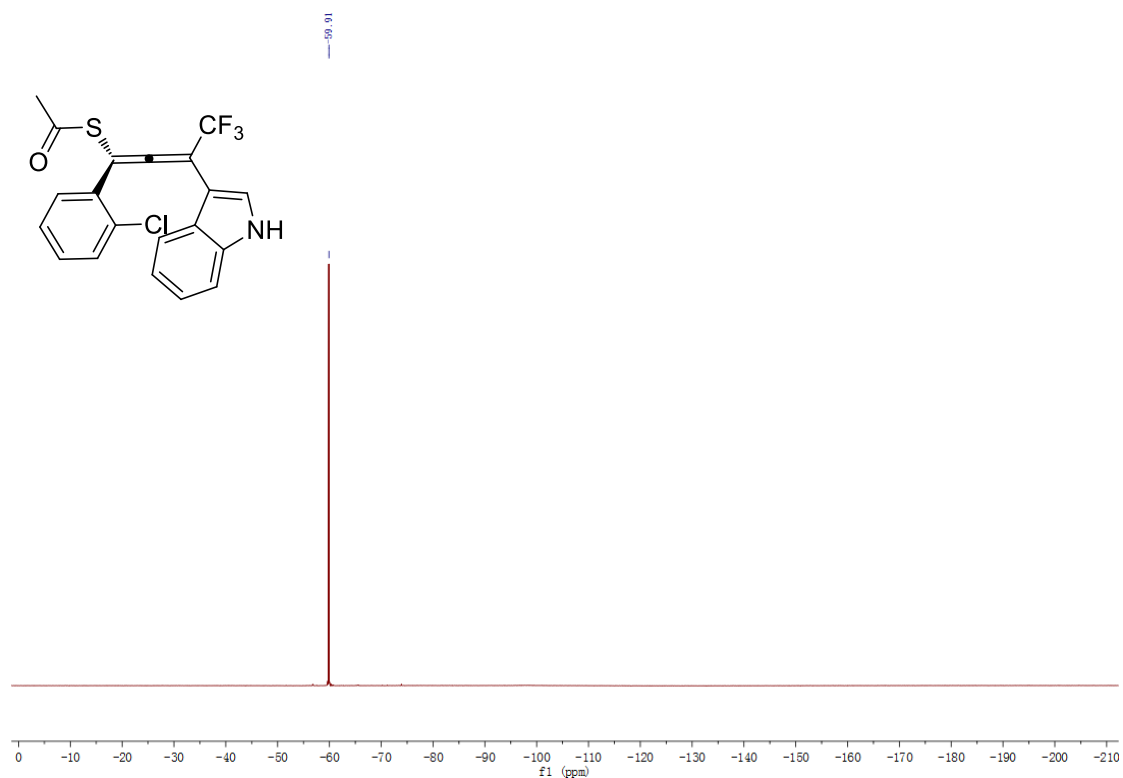

**(S)-S-(4,4,4-trifluoro-3-(1H-indol-3-yl)-1-(thiophen-3-yl)buta-1,2-dien-1-yl)ethanethioate (3la)**

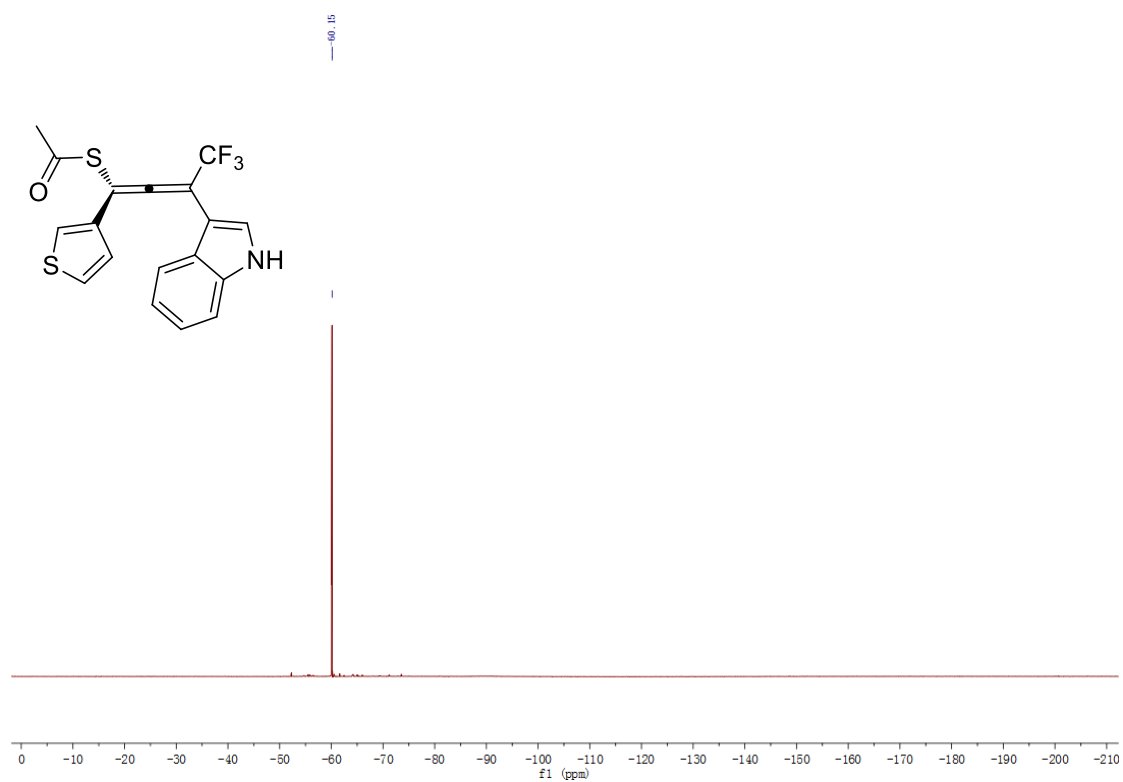

**(S)-S-(1,1,1-trifluoro-2-(1H-indol-3-yl)hepta-2,3-dien-4-yl) ethanethioate (3ma)**

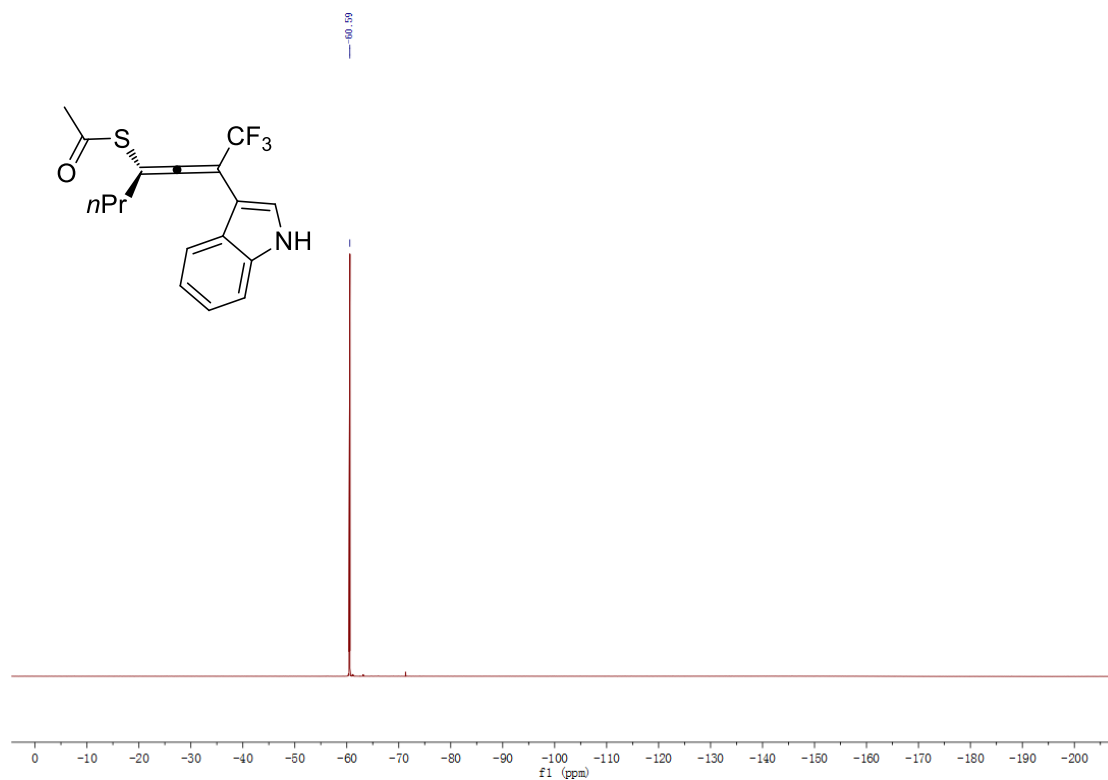

**(S)-S-(1,1,1-trifluoro-2-(1H-indol-3-yl)octa-2,3-dien-4-yl) ethanethioate (3na)**

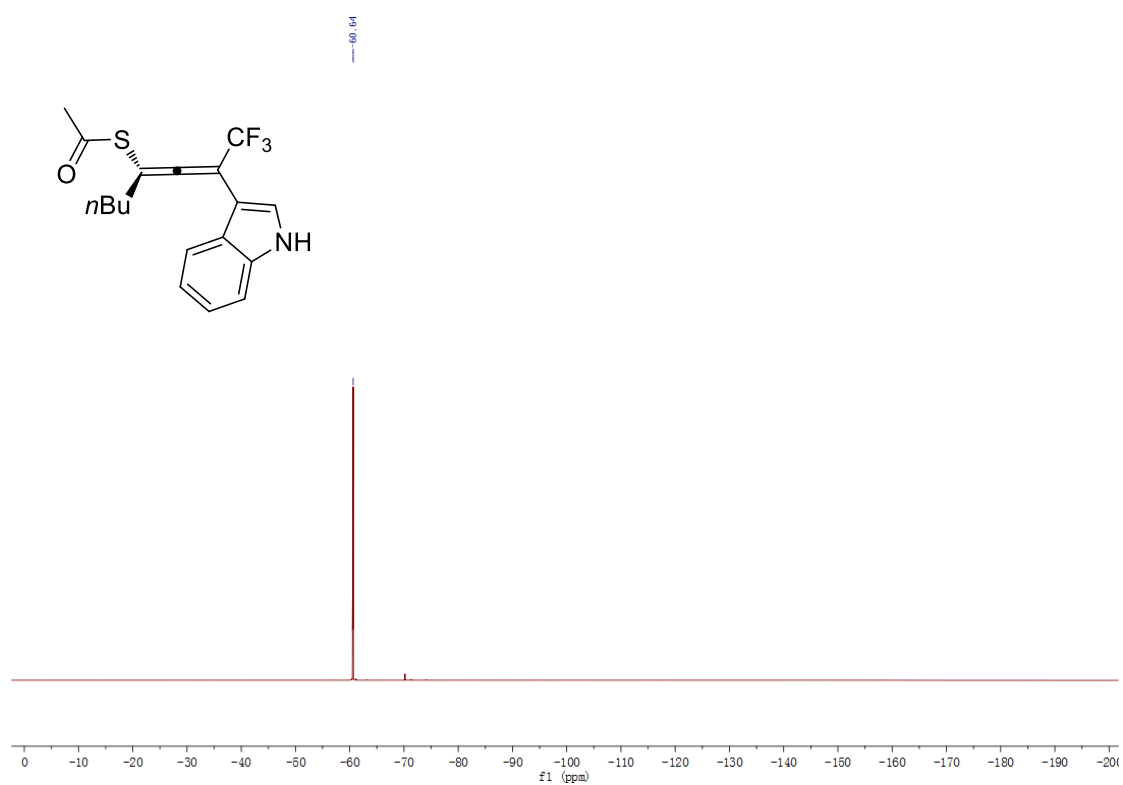

**(S)-S-(1-cyclopropyl-4,4,4-trifluoro-3-(1H-indol-3-yl)buta-1,2-dien-1-yl)**

**ethanethioate (30a)**

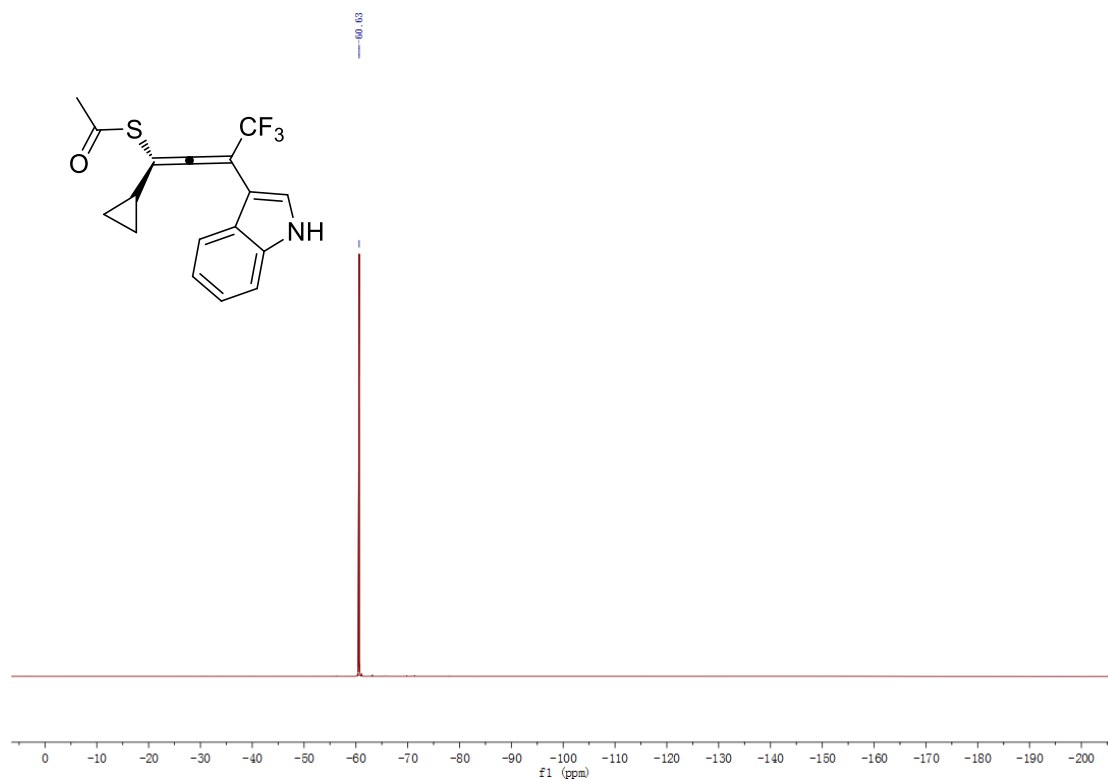

**(S)-S-(4,4,4-trifluoro-3-(5-fluoro-1H-indol-3-yl)-1-phenylbuta-1,2-dien-1-yl) ethanethioate (3pa)**

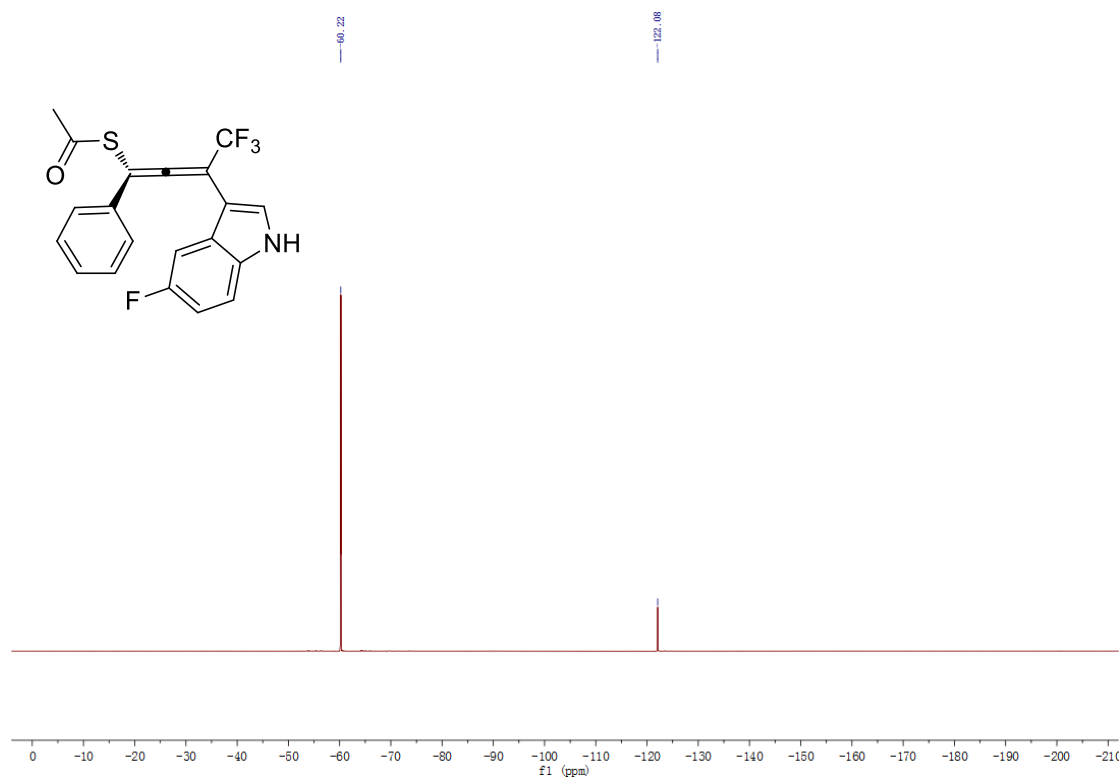

**(S)-S-(3-(5-chloro-1H-indol-3-yl)-4,4,4-trifluoro-1-phenylbuta-1,2-dien-1-yl)**

**ethanethioate (3qa)**

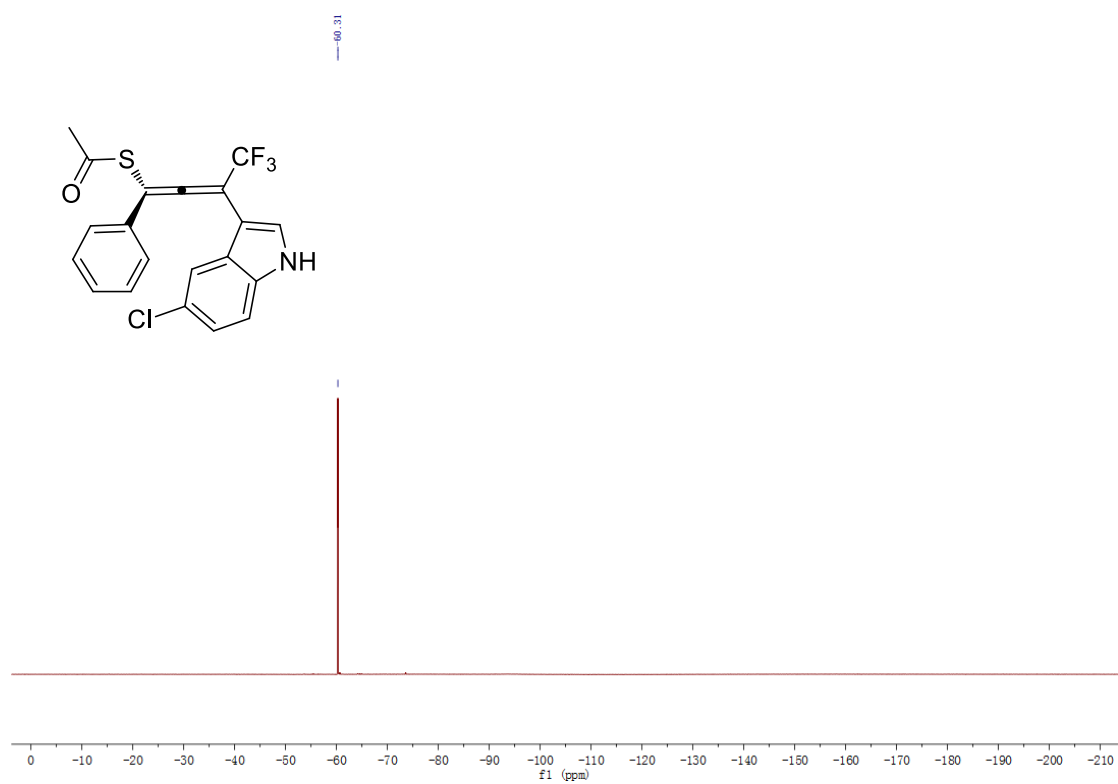

**(S)-S-(3-(5-bromo-1H-indol-3-yl)-4,4,4-trifluoro-1-phenylbuta-1,2-dien-1-yl)ethanethioate (3ra)**

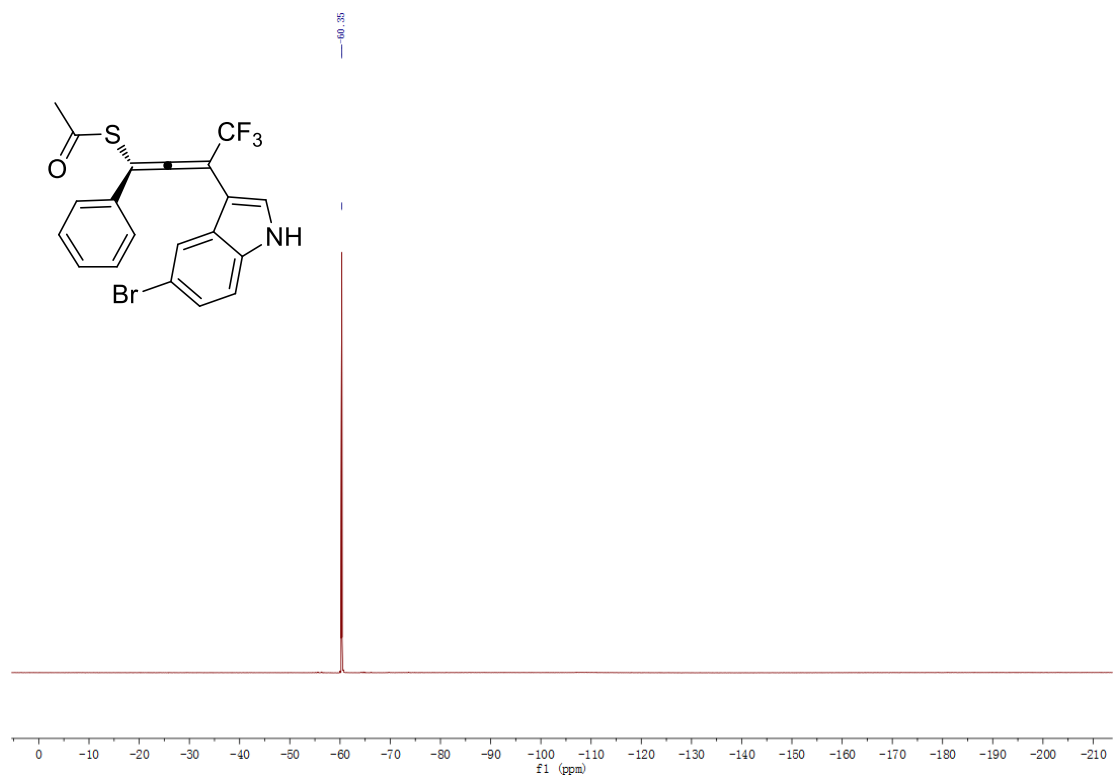

**(S)-S-(4,4,4-trifluoro-3-(5-methyl-1H-indol-3-yl)-1-phenylbuta-1,2-dien-1-yl)**



**ethanethioate (3sa)**

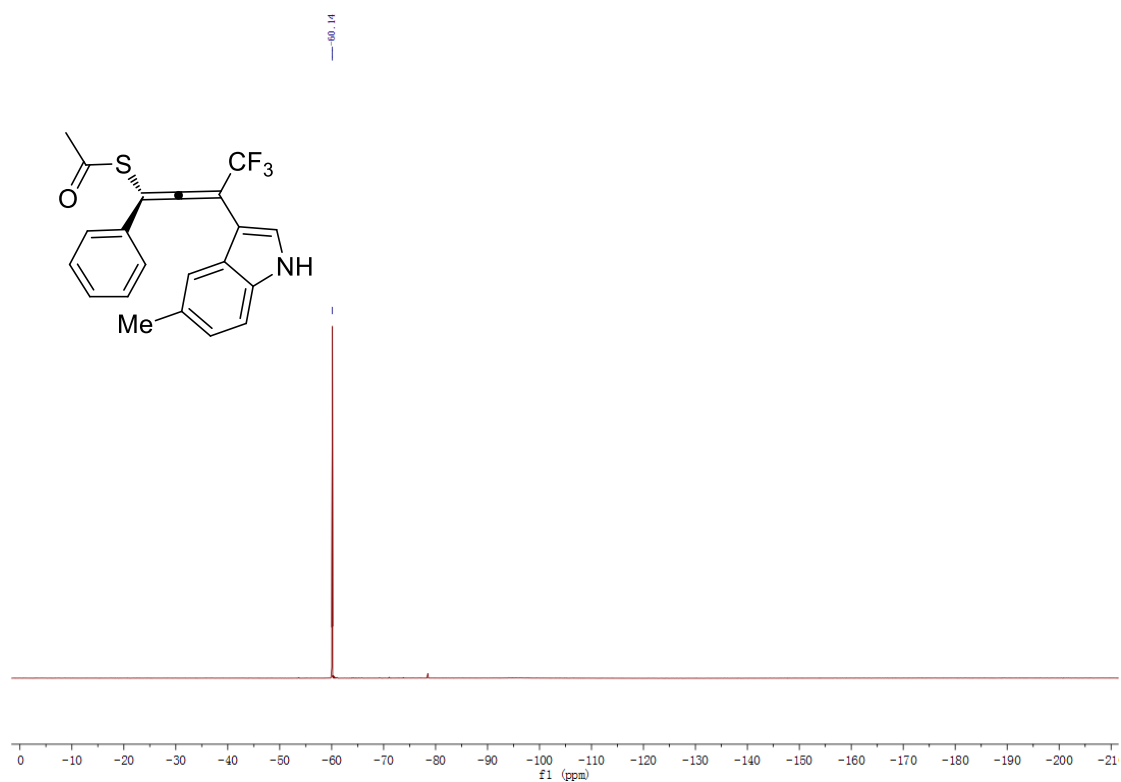

**(S)-S-(4,4,4-trifluoro-3-(6-fluoro-1H-indol-3-yl)-1-phenylbuta-1,2-dien-1-yl) ethanethioate (3ta)**

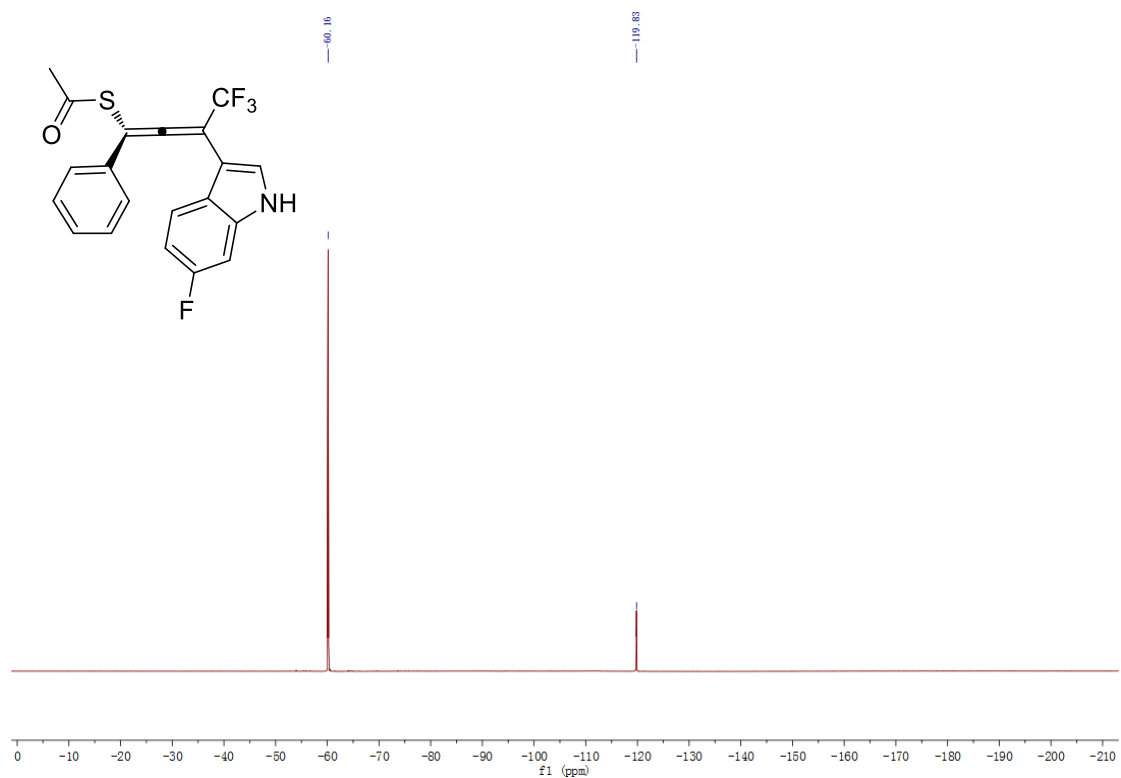

**(S)-S-(4,4,4-trifluoro-3-(6-methyl-1H-indol-3-yl)-1-phenylbuta-1,2-dien-1-yl)**

**ethanethioate (3ua)**

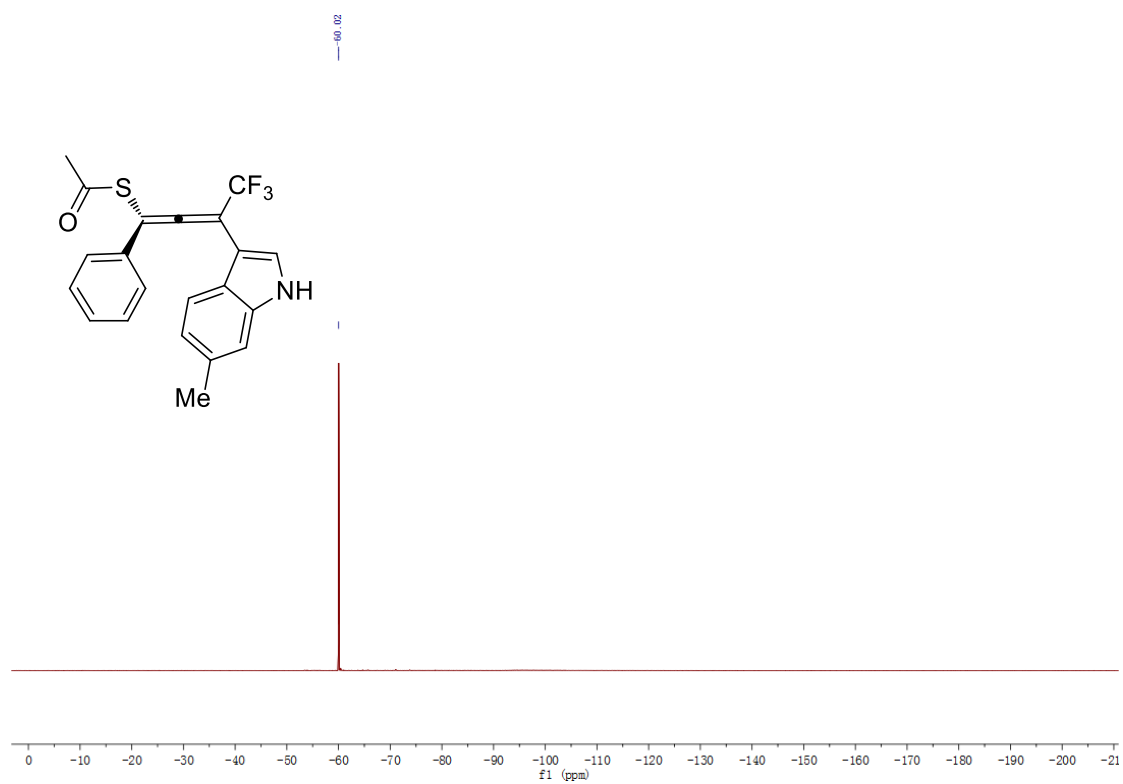

**(S)-S-(4,4,4-trifluoro-3-(7-methyl-1H-indol-3-yl)-1-phenylbuta-1,2-dien-1-yl) ethanethioate (3va)**

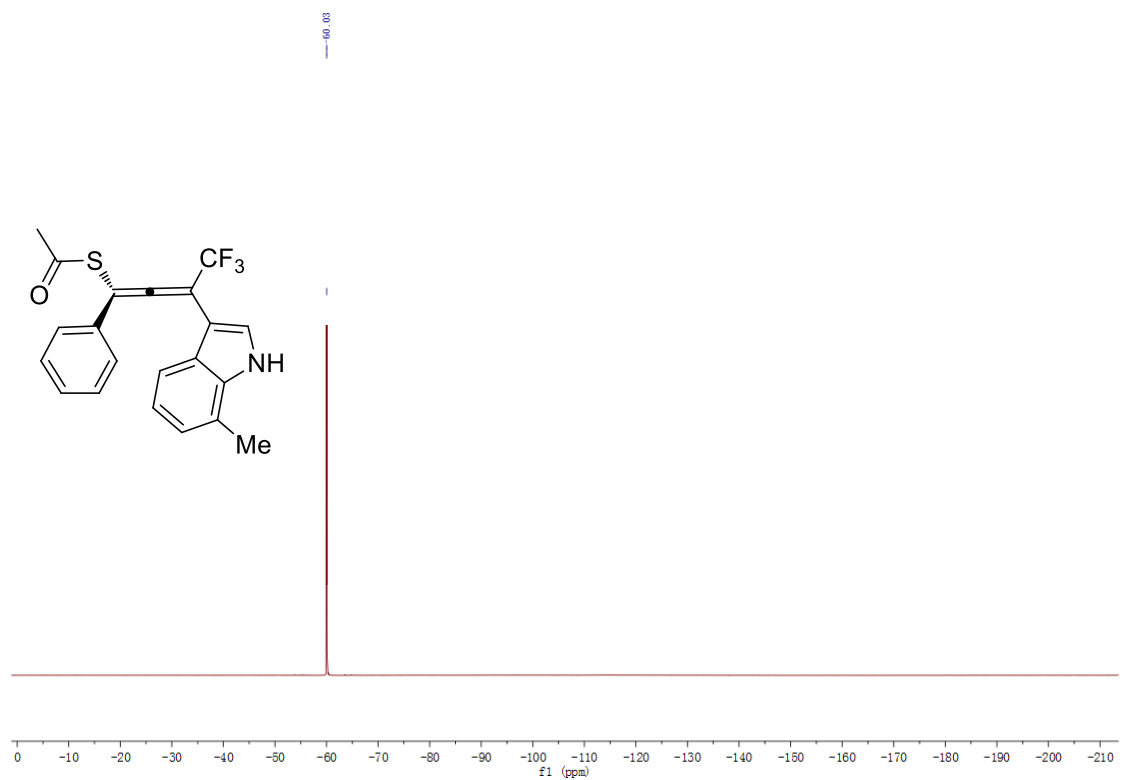

**(S)-S-(4,4,4-trifluoro-3-(1H-indol-3-yl)-1-phenylbuta-1,2-dien-1-yl) benzothioate**

(3ab)

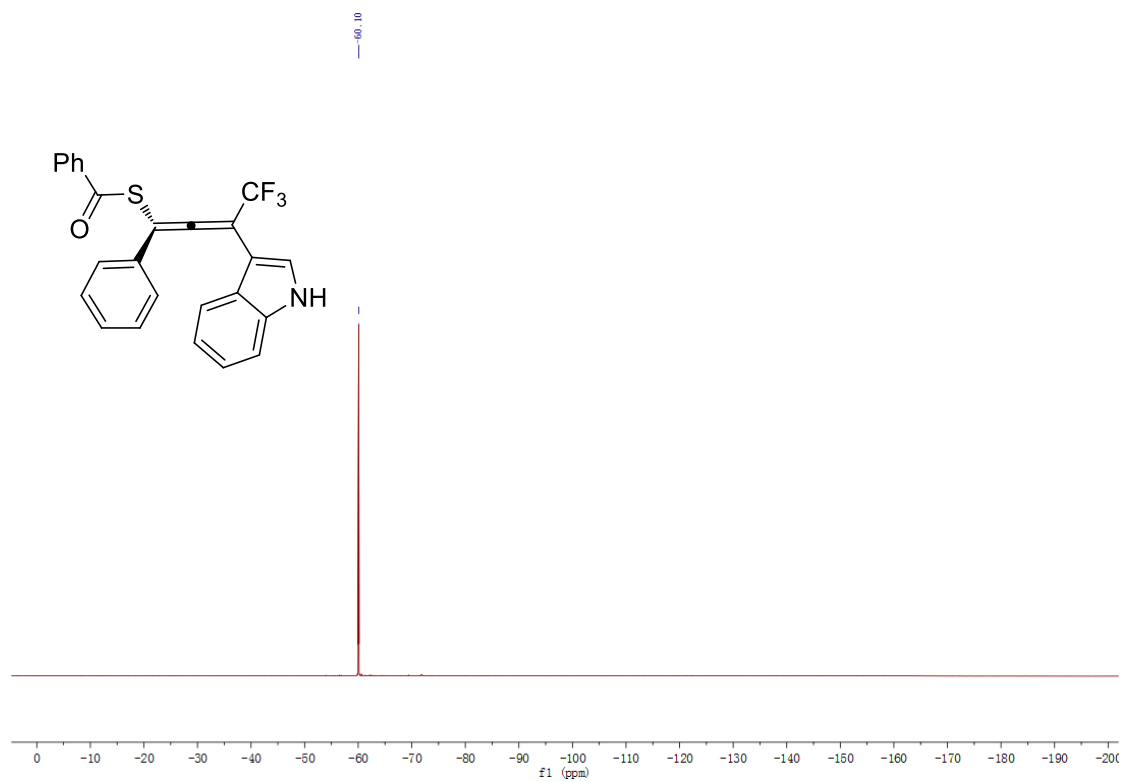

# K: X-ray Analysis

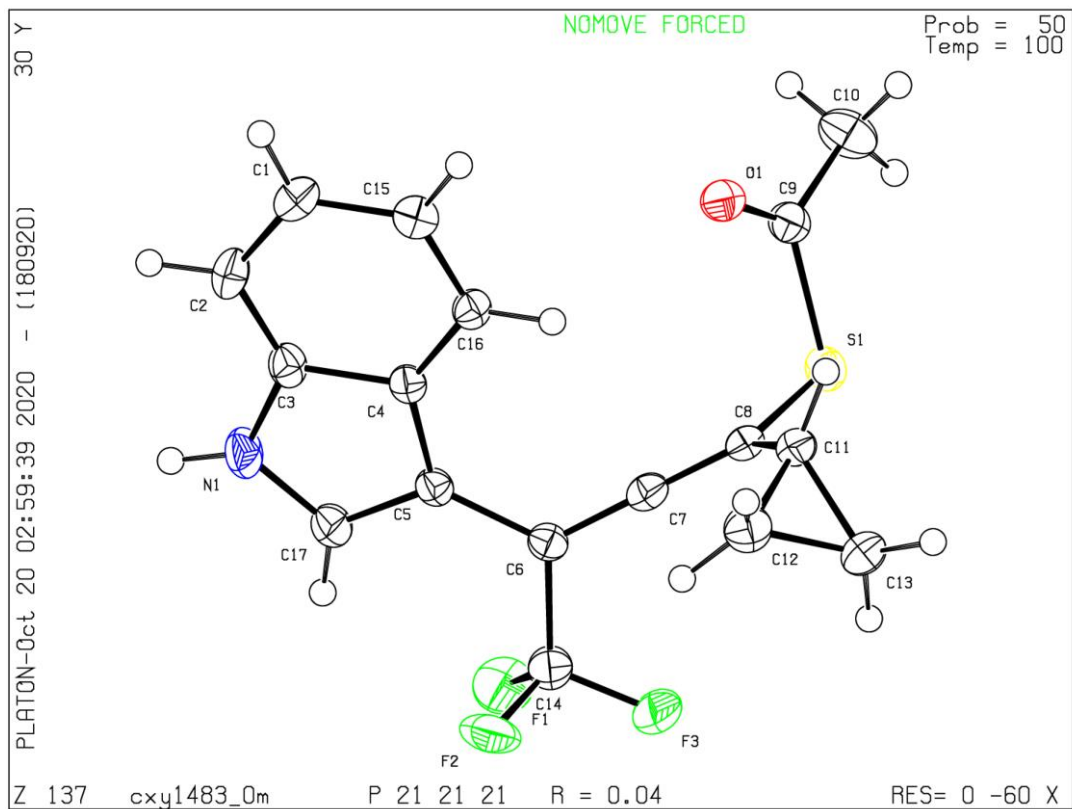

**Table Crystal data and structure refinement for 3oa.**

|                                             |                                                               |
|---------------------------------------------|---------------------------------------------------------------|
| Identification code                         | <b>3oa</b>                                                    |
| Empirical formula                           | C <sub>17</sub> H <sub>14</sub> F <sub>3</sub> NOS            |
| Formula weight                              | 337.35                                                        |
| Temperature/K                               | 100                                                           |
| Crystal system                              | orthorhombic                                                  |
| Space group                                 | P2 <sub>1</sub> 2 <sub>1</sub> 2 <sub>1</sub>                 |
| a/Å                                         | 8.9035(15)                                                    |
| b/Å                                         | 9.1118(17)                                                    |
| c/Å                                         | 20.094(4)                                                     |
| α/°                                         | 90                                                            |
| β/°                                         | 90                                                            |
| γ/°                                         | 90                                                            |
| Volume/Å <sup>3</sup>                       | 1630.1(5)                                                     |
| Z                                           | 4                                                             |
| ρ <sub>calc</sub> /g/cm <sup>3</sup>        | 1.375                                                         |
| μ/mm <sup>-1</sup>                          | 0.231                                                         |
| F(000)                                      | 696.0                                                         |
| Crystal size/mm <sup>3</sup>                | 0.31 × 0.24 × 0.14                                            |
| Radiation                                   | MoKα (λ = 0.71073)                                            |
| 2θ range for data collection/°              | 4.908 to 55.626                                               |
| Index ranges                                | -11 ≤ h ≤ 11, -11 ≤ k ≤ 11, -25 ≤ l ≤ 26                      |
| Reflections collected                       | 27976                                                         |
| Independent reflections                     | 3831 [R <sub>int</sub> = 0.0760, R <sub>sigma</sub> = 0.0439] |
| Data/restraints/parameters                  | 3831/0/209                                                    |
| Goodness-of-fit on F <sup>2</sup>           | 1.047                                                         |
| Final R indexes [I >= 2σ (I)]               | R <sub>1</sub> = 0.0358, wR <sub>2</sub> = 0.0802             |
| Final R indexes [all data]                  | R <sub>1</sub> = 0.0508, wR <sub>2</sub> = 0.0863             |
| Largest diff. peak/hole / e Å <sup>-3</sup> | 0.23/-0.21                                                    |
| Flack parameter                             | 0.01(4)                                                       |

## **L: Reference**

1. E. Martinelli, A. Vicini, M. Mancinelli, A. Mazzanti, P. Zani, L. Bernardi, M. Fochi, *Chem. Commun.* **2015**, *51*, 658-660.
2. X. Li, J. Sun, *Angew.Chem. Int. Ed.* **2020**, *59*, 17049-17054.
